# Supplementary material for: Highly planar diarylamine-fused porphyrins and their remarkably stable radical cations
Source: PubMed Central journal article supplement — Chem Sci. 2016 Aug 1;8(1):189–99. doi: 10.1039/c6sc02721k (PMC5308406; doi:10.1039/c6sc02721k), 2016-08-01
Supplement: SC-008-C6SC02721K-s001.pdf [file SC-008-C6SC02721K-s001.pdf]

## Supplementary Information for

# Highly planar diarylamine-fused porphyrins and their remarkably stable radical cations

Norihito Fukui,<sup>a</sup> Wonhee Cha,<sup>b</sup> Daiki Shimizu,<sup>a</sup> Juwon Oh,<sup>b</sup> Ko Furukawa,<sup>c</sup> Hideki Yorimitsu,<sup>a</sup>  
Dongho Kim,<sup>b</sup> and Atsuhiko Osuka<sup>a</sup>

<sup>a</sup>Department of Chemistry, Graduate School of Science, Kyoto University, Sakyo-ku, Kyoto 606-8502,  
Japan.

<sup>b</sup>Spectroscopy Laboratory of Functional  $\pi$ -Electronic Systems and Department of Chemistry, Yonsei  
University, Seoul 120-749, Korea.

<sup>c</sup>Center for Instrumental Analysis, Niigata University, Nishi-ku, Niigata 950-2181, Japan.

### Contents

1. Instrumentation and Materials
2. Experimental Procedures
3. Compound Data
4. <sup>1</sup>H NMR Dilution Titration
5. X-Ray Crystal Structures
6. Electrochemical Properties
7. ESR Spectra
8. Temperature Dependent Magnetic Susceptibility
9. DFT Calculations
10. Fluorescence Decay and Time-resolved TA Spectra
11. Z-Scan Curves in TPA Measurements
12. References

## **1. Instrumentation and Materials**

<sup>1</sup>H NMR (600 MHz) and <sup>13</sup>C NMR (151 MHz) spectra were taken on a JEOL ECA-600 spectrometer. Chemical shifts were reported as delta scale in ppm relative to CHCl<sub>3</sub> ( $\delta = 7.26$ ) for <sup>1</sup>H NMR and to CDCl<sub>3</sub> ( $\delta = 77.16$ ) for <sup>13</sup>C NMR. UV/Vis absorption spectra were recorded on a Shimadzu UV-3600 spectrometer. High-resolution APCI-TOF mass spectra were taken on a Bruker micrOTOF. X-Ray data were taken at  $-180$  °C with a Rigaku XtaLAB P200 diffractometer by using graphite monochromated Cu-K $\alpha$  radiation ( $\lambda = 1.54187$  Å). The structures were solved by direct method SIR-97 and refined by SHELXL-97 program.<sup>[S1]</sup> Preparative separations were performed by silica gel column chromatography (Wako gel C-200, C-300, and C-400). Toluene was distilled from CaH<sub>2</sub>. THF was purified by passing through a neutral alumina column under N<sub>2</sub>. CHCl<sub>3</sub> was purified by passing through an alumina column. Unless otherwise noted, materials obtained from commercial suppliers were used without further purification. Palau'Chlor was purchased from Sigma-Aldrich.

## 2. Experimental Procedures

**Singly phenoxazine-fused Ni(II) porphyrin 9.** A flask containing *meso*-phenoxazino Ni(II) porphyrin **7** (111 mg, 100  $\mu\text{mol}$ ), DDQ (227 mg, 1.0 mmol), and Sc(OTf)<sub>3</sub> (492 mg, 1.0 mmol) was purged with argon, and then charged with ClCH<sub>2</sub>CH<sub>2</sub>Cl (17.5 mL) and MeNO<sub>2</sub> (17.5 mL). The mixture was stirred at 70 °C for 1 h. The reaction was quenched by addition of a saturated aqueous NaHCO<sub>3</sub> solution. The organic phase was separated and washed with water and brine, and dried over anhydrous Na<sub>2</sub>SO<sub>4</sub>. After removal of the solvent *in vacuo*, the reaction mixture was diluted with THF and filtered through a small plug of alumina with copious washings (THF). After removal of the solvent *in vacuo*, the residue was separated by silica gel chromatography eluting with CH<sub>2</sub>Cl<sub>2</sub>/hexane. Recrystallization from CH<sub>2</sub>Cl<sub>2</sub>/MeOH gave **9** (63.9 mg, 57.5  $\mu\text{mol}$ , 58%). <sup>1</sup>H NMR (600 MHz, CDCl<sub>3</sub>, 60 °C):  $\delta$  = 9.16 (d, *J* = 4.6 Hz, 1H,  $\beta$ ), 8.97 (s, 1H,  $\beta$ ), 8.68 (d, *J* = 4.6 Hz, 1H,  $\beta$ ), 8.66 (d, *J* = 4.6 Hz, 1H,  $\beta$ ), 8.63 (d, *J* = 4.6 Hz, 1H,  $\beta$ ), 8.60 (d, *J* = 4.6 Hz, 1H,  $\beta$ ), 8.52 (d, *J* = 4.6 Hz, 1H,  $\beta$ ), 8.17 (d, *J* = 7.8 Hz, 1H, phenoxazine), 7.79 (t, *J* = 1.8 Hz, 1H, Ar), 7.72 (t, *J* = 1.8 Hz, 1H, Ar), 7.71 (t, *J* = 1.8 Hz, 1H, Ar), 7.47 (t, *J* = 7.8 Hz, 1H, phenoxazine), 7.31 (d, *J* = 7.8 Hz, 1H, phenoxazine), 7.21 (d, *J* = 7.8 Hz, 1H, phenoxazine), 7.03 (t, *J* = 7.8 Hz, 1H, phenoxazine), 7.00 (d, *J* = 7.8 Hz, 1H, phenoxazine), 6.59 (t, *J* = 7.8 Hz, 1H, phenoxazine), and 1.60-1.30 (m, 54H, *tert*-butyl) ppm (The signals for the some protons of the 3,5-di-*tert*-butylphenyl groups are too broad to analyze because of flapping of the porphyrin skeleton and/or rotation of the 3,5-di-*tert*-butylphenyl groups.); <sup>13</sup>C NMR (151 MHz, CDCl<sub>3</sub>, 60 °C):  $\delta$  = 149.74, 149.41, 149.34, 148.40, 147.85, 144.40, 143.80, 143.21, 142.94, 141.33, 140.26, 140.11, 139.83, 139.78, 134.88, 134.76, 134.48, 133.83, 133.13, 132.90, 132.60, 131.58, 131.25, 128.75, 128.71, 128.63 (overlap), 127.57, 126.01, 124.58, 123.57, 121.39, 121.34, 121.20, 121.13 (overlap), 119.19, 119.07, 117.99, 117.35, 116.10, 115.34, 114.89, 114.40, 35.25, 35.18 (overlap), 31.91, and 31.87 (overlap) ppm; APCI-TOF-MS: *m/z* = 1109.5472. Calcd for C<sub>74</sub>H<sub>77</sub>N<sub>5</sub><sup>58</sup>NiO: 1109.5487 [M]<sup>+</sup>; UV/Vis (CH<sub>2</sub>Cl<sub>2</sub>):  $\lambda_{\text{max}}$  ( $\epsilon$  [M<sup>-1</sup>cm<sup>-1</sup>]) = 393 (4.10 × 10<sup>4</sup>), 462 (1.48 × 10<sup>5</sup>), and 621 nm (2.52 × 10<sup>4</sup>).

**Doubly phenoxazine-fused Ni(II) porphyrin 4Ni.** A flask containing **9** (11.1 mg, 10  $\mu\text{mol}$ ) was purged with argon, and then charged with ClCH<sub>2</sub>CH<sub>2</sub>Cl (3.0 mL) and FeCl<sub>3</sub> (16.2 mg, 100  $\mu\text{mol}$ ) dissolved in MeNO<sub>2</sub> (0.5 mL). The mixture was stirred at 90 °C for 1 h. The reaction was quenched by addition of a saturated aqueous NaHCO<sub>3</sub> solution. The organic phase was separated and washed with water and brine, and dried over anhydrous Na<sub>2</sub>SO<sub>4</sub>. After removal of the solvent *in vacuo*, the reaction mixture was diluted with THF and filtered through a small plug of alumina with copious washings (THF). After removal of the solvent *in vacuo*, the residue was passed through a small plug of silica gel with copious washings (CHCl<sub>3</sub>). After removal of the solvent *in vacuo*, a flask containing the residue, Pd<sub>2</sub>(dba)<sub>3</sub> (9.2 mg, 10  $\mu\text{mol}$ ), and SPhos (8.2 mg, 20  $\mu\text{mol}$ ) was purged with argon, and then charged with toluene (1.0 mL), NEt<sub>3</sub> (14  $\mu\text{L}$ , 100  $\mu\text{mol}$ ), and HCOOH (4  $\mu\text{L}$ , 100  $\mu\text{mol}$ ). The mixture was stirred at 120 °C for 1 h. The reaction mixture was diluted with CH<sub>2</sub>Cl<sub>2</sub> and filtered through a small plug of Celite<sup>®</sup> with copious washings (CH<sub>2</sub>Cl<sub>2</sub>). After removal of the solvent *in vacuo*, the residue was separated by silica gel chromatography eluting with CH<sub>2</sub>Cl<sub>2</sub>/hexane. Recrystallization from CH<sub>2</sub>Cl<sub>2</sub>/MeOH gave **4Ni** (6.4 mg, 5.8  $\mu\text{mol}$ , 58%). <sup>1</sup>H NMR (600 MHz, CDCl<sub>3</sub>, 25 °C, 10 mM):  $\delta$  = 8.91 (s, 2H,  $\beta$ ), 8.76 (d, *J* = 4.8 Hz, 2H,  $\beta$ ), 8.71 (d, *J* = 4.8 Hz, 2H,  $\beta$ ), 8.05 (d, *J* = 1.9 Hz, 2H,

Ar), 8.02 (d,  $J = 1.9$  Hz, 4H, Ar), 8.00 (d,  $J = 6.9$  Hz, 2H, phenoxazine), 8.12 (t,  $J = 1.9$  Hz, 2H, Ar), 7.75 (t,  $J = 1.9$  Hz, 1H, Ar), 7.21 (t,  $J = 6.9$  Hz, 2H, phenoxazine), 6.51 (d,  $J = 6.9$  Hz, 2H, phenoxazine), 1.58 (s, 36H, *tert*-butyl), and 1.54 (s, 18H, *tert*-butyl) ppm;  $^{13}\text{C}$  NMR (151 MHz,  $\text{CDCl}_3$ , 25 °C, 10 mM):  $\delta = 149.30, 149.11, 146.34, 144.54, 142.36, 141.80, 141.33, 141.16, 133.52, 130.98, 129.06, 128.82, 127.71, 127.02, 125.25, 121.10, 120.76, 120.18, 120.12, 119.34, 117.80, 114.43, 114.40, 113.66, 111.72, 35.27, 35.21, 32.00, \text{ and } 31.95$  ppm; APCI-TOF-MS:  $m/z = 1107.5294$ . Calcd for  $\text{C}_{74}\text{H}_{75}\text{N}_5^{58}\text{NiO}$ : 1107.5331 [M] $^-$ ; UV/Vis ( $\text{CH}_2\text{Cl}_2$ ):  $\lambda_{\text{max}}$  ( $\epsilon$  [ $\text{M}^{-1}\text{cm}^{-1}$ ]) = 447 ( $1.62 \times 10^5$ ), 570 ( $1.27 \times 10^4$ ), and 614 nm ( $3.33 \times 10^4$ ).

**Doubly phenoxazine-fused free base porphyrin 4H<sub>2</sub>.** Conc.  $\text{H}_2\text{SO}_4$  (1.0 mL) was added slowly to a mixture of **4Ni** (23.9 mg, 21.5  $\mu\text{mol}$ ) and TFA (2.0 mL) at 0 °C. The reaction mixture was stirred at 0 °C in air for 1.5 h, and then poured into water at 0 °C. After neutralization with NaOH and  $\text{Na}_2\text{CO}_3$  at 0 °C, the product was extracted with  $\text{CH}_2\text{Cl}_2$ , and the organic extract was washed with brine, and dried over anhydrous  $\text{Na}_2\text{SO}_4$ . After removal of the solvent *in vacuo*, the residue was separated by silica gel chromatography eluting with  $\text{CH}_2\text{Cl}_2$ /hexane. Recrystallization of the separated solids from  $\text{CH}_2\text{Cl}_2$ /MeOH gave **4H<sub>2</sub>** (9.5 mg, 9.0  $\mu\text{mol}$ , 42%).  $^1\text{H}$  NMR (600 MHz,  $\text{CDCl}_3$ , 25 °C, 5.0 mM):  $\delta = 9.18$  (s, 2H,  $\beta$ ), 8.77 (d,  $J = 4.6$  Hz, 2H,  $\beta$ ), 8.64 (d,  $J = 4.6$  Hz, 2H,  $\beta$ ), 8.40 (d,  $J = 6.9$  Hz, 2H, phenoxazine), 8.19 (d,  $J = 1.9$  Hz, 4H, Ar), 8.07 (d,  $J = 1.9$  Hz, 2H, Ar), 7.86 (t,  $J = 1.9$  Hz, 2H, Ar), 7.76 (t,  $J = 1.9$  Hz, 1H, Ar), 7.58 (t,  $J = 6.9$  Hz, 2H, phenoxazine), 7.13 (d,  $J = 6.9$  Hz, 2H, phenoxazine), 1.60 (s, 36H, *tert*-butyl), 1.54 (s, 18H, *tert*-butyl), and -0.53 (br s, 2H, inner NH) ppm;  $^{13}\text{C}$  NMR (151 MHz,  $\text{CDCl}_3$ , 25 °C, 5.0 mM):  $\delta = 149.37, 148.93, 145.45, 142.07, 141.57, 129.67, 129.51, 126.32, 121.38, 121.32, 121.17, 120.66, 120.56, 118.92, 114.96, 114.31, 113.09, 112.54, 35.31, 35.18, \text{ and } 31.99$  (overlap) ppm (The signals for the carbons of the porphyrin skeleton were too broad to analyze because of exchange of the inner NH protons.); APCI-TOF-MS:  $m/z = 1051.6089$ . Calcd for  $\text{C}_{74}\text{H}_{77}\text{N}_5\text{O}$ : 1051.6134 [M] $^-$ ; UV/Vis ( $\text{CH}_2\text{Cl}_2$ ):  $\lambda_{\text{max}}$  ( $\epsilon$  [ $\text{M}^{-1}\text{cm}^{-1}$ ]) = 367 ( $3.31 \times 10^4$ ), 452 ( $1.56 \times 10^5$ ), 549 ( $8.56 \times 10^3$ ), 591 ( $2.23 \times 10^4$ ), 620 ( $1.29 \times 10^5$ ), and 680 nm ( $3.74 \times 10^4$ ); Fluorescence ( $\text{CH}_2\text{Cl}_2$ ,  $\lambda_{\text{ex}} = 452$  nm):  $\lambda_{\text{max}} = 686$  and 755 nm,  $\Phi_{\text{F}} = 24.3\%$ .

**Doubly phenoxazine-fused Zn(II) porphyrin 4Zn.** **4H<sub>2</sub>** (7.5 mg, 7.1  $\mu\text{mol}$ ) was dissolved in  $\text{CH}_2\text{Cl}_2$  (5 mL). After addition of an excess amount of  $\text{Zn}(\text{OAc})_2 \cdot 2\text{H}_2\text{O}$  (10 mg, 46  $\mu\text{mol}$ ) dissolved in MeOH (1 mL), the mixture was stirred for 1.5 h at room temperature with shielded from the light in air. The residue was passed through a small plug of silica-gel with copious washings ( $\text{CH}_2\text{Cl}_2$ ). After removal of the solvent *in vacuo*, the residue was separated by silica gel chromatography eluting with  $\text{CH}_2\text{Cl}_2$ /hexane. Recrystallization of the separated solids from  $\text{CH}_2\text{Cl}_2$ /MeOH gave **4Zn** (4.5 mg, 4.0  $\mu\text{mol}$ , 57%).  $^1\text{H}$  NMR (600 MHz,  $\text{CDCl}_3$ , 25 °C, 1.5 mM):  $\delta = 9.29$  (s, 2H,  $\beta$ ), 8.91 (d,  $J = 4.6$  Hz, 2H,  $\beta$ ), 8.78 (d,  $J = 4.6$  Hz, 2H,  $\beta$ ), 8.44 (d,  $J = 7.8$  Hz, 2H, phenoxazine), 8.20 (d,  $J = 1.4$  Hz, 4H, Ar), 8.04 (d,  $J = 1.4$  Hz, 2H, Ar), 7.86 (t,  $J = 1.4$  Hz, 2H, Ar), 7.74 (t,  $J = 1.6$  Hz, 1H, Ar), 7.57 (t,  $J = 7.8$  Hz, 2H, phenoxazine), 7.13 (d,  $J = 7.8$  Hz, 2H, phenoxazine), 1.59 (s, 36H, *tert*-butyl), and 1.52 (s, 18H, *tert*-butyl) ppm;  $^{13}\text{C}$  NMR (151 MHz,  $\text{CDCl}_3$ , 25 °C, 5.0 mM):  $\delta = 154.13, 149.43, 149.17, 149.04, 148.84, 145.07, 142.41, 142.35, 133.71, 133.57, 131.42, 129.77,$



129.41, 128.18, 125.92, 122.55, 121.49, 120.96, 120.50, 120.20, 118.95, 115.54, 115.50, 114.25, 111.98, 35.31, 35.19, 32.01, and 31.68; APCI-TOF-MS:  $m/z$  = 1113.5233. Calcd for  $C_{74}H_{75}N_{564}ZnO$ : 1113.5269 [M]<sup>-</sup>; UV/Vis ( $CH_2Cl_2$ ):  $\lambda_{max}$  ( $\epsilon$  [ $M^{-1}cm^{-1}$ ]) = 436 ( $9.88 \times 10^4$ ), 450 ( $2.71 \times 10^5$ ), 591 ( $1.27 \times 10^4$ ), and 640 nm ( $3.75 \times 10^4$ ); Fluorescence ( $CH_2Cl_2$ ,  $\lambda_{ex}$  = 452 nm):  $\lambda_{max}$  = 648 and 706 nm,  $\Phi_F$  = 15.7%.

**Doubly diphenylamine-fused free base porphyrin 10H<sub>2</sub>. 10Ni** (21.9 mg, 20  $\mu$ mol) was placed in a Schlenk flask. The flask was filled with argon. Toluene (1.0 mL) was added to the flask. To the solution, 4-methylphenylmagnesium bromide (0.26 mL, 0.2 mmol, 0.66 M THF solution) was then added. The mixture was stirred at room temperature for 1.5 h. The reaction was quenched with 3 M HCl aq. and extracted with  $CH_2Cl_2$  three times. The combined organic layer was washed with a saturated aqueous  $NaHCO_3$  solution and brine and then dried over anhydrous  $Na_2SO_4$ . After removal of the solvent *in vacuo*, the residue was separated by silica gel chromatography eluting with  $CH_2Cl_2$ /hexane. Recrystallization of the separated solids from  $CH_2Cl_2$ /MeOH gave **10H<sub>2</sub>** (11.7 mg, 11.3  $\mu$ mol, 56%). <sup>1</sup>H NMR (600 MHz,  $CDCl_3$ , 25 °C):  $\delta$  = 9.38 (s, 2H,  $\beta$ ), 9.07 (d,  $J$  = 8.7 Hz, 2H, diphenylamine), 9.02 (d,  $J$  = 8.7 Hz, 2H, diphenylamine), 8.84 (d,  $J$  = 4.6 Hz, 2H,  $\beta$ ), 8.68 (d,  $J$  = 4.6 Hz, 2H,  $\beta$ ), 8.32-8.10 (br d,  $J$  = 518 Hz, 4H, Ar), 8.04 (d,  $J$  = 1.9 Hz, 2H, Ar), 7.88 (t,  $J$  = 1.9 Hz, 2H, Ar), 7.83 (t,  $J$  = 8.7 Hz, 2H, diphenylamine), 7.76-7.70 (m, 3H, Ar + diphenylamine), 1.61 (br s, 36H, *tert*-butyl), 1.52 (s, 18H, *tert*-butyl), and -0.58 (br s, 2H, inner NH) ppm; <sup>13</sup>C NMR (151 MHz,  $CDCl_3$ , 25 °C):  $\delta$  = 149.40, 148.87, 142.05, 141.51, 134.82, 132.22, 131.03, 129.85, 129.67, 126.00, 125.52, 125.24, 123.91, 123.69, 121.72, 121.19, 120.70, 118.65, 114.99, 113.74, 35.31, 35.16, and 31.96 (overlap) ppm (The signals for the carbons of the porphyrin skeleton were too broad to analyze because of exchange of the inner NH protons.); APCI-TOF-MS:  $m/z$  = 1037.6308. Calcd for  $C_{74}H_{79}N_5$ : 1037.6341 [M]<sup>-</sup>; UV/Vis ( $CH_2Cl_2$ ):  $\lambda_{max}$  ( $\epsilon$  [ $M^{-1}cm^{-1}$ ]) = 440 ( $1.79 \times 10^5$ ), 453 ( $1.79 \times 10^5$ ), 551 ( $9.66 \times 10^3$ ), 593 ( $2.65 \times 10^4$ ), 618 ( $1.20 \times 10^4$ ), and 678 nm ( $3.52 \times 10^4$ ); Fluorescence ( $CH_2Cl_2$ ,  $\lambda_{ex}$  = 452 nm):  $\lambda_{max}$  = 683 and 750 nm,  $\Phi_F$  = 16.8%.

**Doubly diphenylamine-fused Zn(II) porphyrin 10Zn. 10H<sub>2</sub>** (19.4 mg, 18.7  $\mu$ mol) was dissolved in  $CH_2Cl_2$  (30 mL). After addition of an excess amount of  $Zn(OAc)_2 \cdot 2H_2O$  (22.5 mg, 0.10 mmol) dissolved in MeOH (1.0 mL), the mixture was stirred for 1.5 h at room temperature with shielded from the light in air. The residue was passed through a small plug of silica-gel with copious washings ( $CH_2Cl_2$ ). After removal of the solvent *in vacuo*, the residue was separated by silica gel chromatography eluting with  $CH_2Cl_2$ /hexane. Recrystallization of the separated solids from  $CH_2Cl_2$ /hexane gave **10Zn** (13.7 mg, 12.4  $\mu$ mol, 67%). <sup>1</sup>H NMR (600 MHz,  $CDCl_3$ , 25 °C):  $\delta$  = 9.45 (s, 2H,  $\beta$ ), 9.10 (d,  $J$  = 8.3 Hz, 2H, diphenylamine), 9.04 (d,  $J$  = 8.3 Hz, 2H, diphenylamine), 8.95 (d,  $J$  = 4.6 Hz, 2H,  $\beta$ ), 8.81 (d,  $J$  = 4.6 Hz, 2H,  $\beta$ ), 8.32-8.10 (br d,  $J$  = 866 Hz, 4H, Ar), 8.05 (d,  $J$  = 1.8 Hz, 2H, Ar), 7.88 (t,  $J$  = 1.8 Hz, 2H, Ar), 7.83 (t,  $J$  = 8.3 Hz, 2H, diphenylamine), 7.76-7.70 (m, 3H, Ar + diphenylamine), 1.61 (br s, 36H, *tert*-butyl), and 1.53 (s, 18H, *tert*-butyl) ppm; <sup>13</sup>C NMR (151 MHz,  $CDCl_3$ , 25 °C):  $\delta$  = 153.68, 150.15, 149.18, 149.09, 148.79, 142.35, 142.26, 135.49, 134.76, 133.50, 131.45, 130.41, 129.71, 129.54, 126.13, 125.30, 125.10, 123.94, 123.83, 122.90, 120.99, 120.52, 119.32, 116.23, 114.92, 35.31, 35.17, and 31.98 (overlap) ppm; APCI-TOF-MS:  $m/z$  = 1099.5463. Calcd for  $C_{74}H_{77}N_{564}Zn$ :

1099.5476 [M]<sup>-</sup>; UV/Vis (CH<sub>2</sub>Cl<sub>2</sub>):  $\lambda_{\max}$  ( $\epsilon$  [M<sup>-1</sup>cm<sup>-1</sup>]) = 439 (2.31 × 10<sup>5</sup>), 453 (3.68 × 10<sup>5</sup>), 585 (1.58 × 10<sup>3</sup>), and 632 nm (4.66 × 10<sup>4</sup>); Fluorescence (CH<sub>2</sub>Cl<sub>2</sub>,  $\lambda_{\text{ex}}$  = 452 nm):  $\lambda_{\text{max}}$  = 640 and 695 nm,  $\Phi_{\text{F}}$  = 12.9%.

**$\beta$ -Dichloro phenoxazine-fused Ni(II) porphyrin 13.** 4Ni (22.2 mg, 20  $\mu$ mol) was dissolved in CHCl<sub>3</sub> (12 mL). The mixture was stirred at 0 °C, and Palau'Chlor (2.0 mL, 44  $\mu$ mol, 22 mM CHCl<sub>3</sub> solution) was added dropwise over 10 min. Then, the mixture was stirred at room temperature for 2.5 h. The reaction mixture was diluted with CH<sub>2</sub>Cl<sub>2</sub> and filtered through a small plug of silica gel with copious washings (CH<sub>2</sub>Cl<sub>2</sub>). After removal of the solvent *in vacuo*, recrystallization from CHCl<sub>3</sub>/MeOH gave **13** (18.2 mg, 15.4  $\mu$ mol, 77%). <sup>1</sup>H NMR (600 MHz, CDCl<sub>3</sub>, 25 °C, 1.6 mM):  $\delta$  = 9.12 (d,  $J$  = 6.8 Hz, 2H, phenoxazine), 8.86 (d,  $J$  = 5.0 Hz, 2H,  $\beta$ ), 8.60 (d,  $J$  = 5.0 Hz, 2H,  $\beta$ ), 7.82 (d,  $J$  = 1.9 Hz, 2H, Ar), 7.72-7.68 (m, 5H, Ar), 7.67 (t,  $J$  = 1.9 Hz, 2H, Ar), 7.41 (t,  $J$  = 6.8 Hz, 2H, phenoxazine), 6.96 (d,  $J$  = 6.8 Hz, 2H, phenoxazine), and 1.46 (br s, 54H, *tert*-butyl) ppm; The <sup>13</sup>C NMR signals were too weak to analyze because of the low solubility.; APCI-TOF-MS:  $m/z$  = 1175.4510. Calcd for C<sub>74</sub>H<sub>73</sub>N<sub>5</sub><sup>58</sup>NiO<sup>35</sup>Cl<sub>2</sub>: 1175.4551 [M]<sup>-</sup>; UV/Vis (CH<sub>2</sub>Cl<sub>2</sub>):  $\lambda_{\max}$  ( $\epsilon$  [M<sup>-1</sup>cm<sup>-1</sup>]) = 402 (4.37 × 10<sup>4</sup>), 455 (1.68 × 10<sup>5</sup>), 598 (1.46 × 10<sup>4</sup>), and 628 nm (2.94 × 10<sup>4</sup>).

**$\beta$ -Dichloro phenoxazine-fused Ni(II) porphyrinium hexachloroantimonate [13]<sup>+</sup>.** **13** (9.4 mg, 8.0  $\mu$ mol) was dissolved in CH<sub>2</sub>Cl<sub>2</sub> (20 mL). The mixture was stirred at room temperature, and tris(4-bromophenyl)aminium hexachloroantimonate (10 mL, 8.8  $\mu$ mol, 0.88 mM CH<sub>2</sub>Cl<sub>2</sub> solution) was added to the mixture. Then, the mixture was stirred at room temperature in air for 10 min. The reaction mixture was diluted with CH<sub>2</sub>Cl<sub>2</sub> and filtered through a small plug of silica gel with copious washings (CH<sub>2</sub>Cl<sub>2</sub>). After removal of the solvent *in vacuo*, recrystallization from CH<sub>2</sub>Cl<sub>2</sub>/hexane gave [**13**]<sup>+</sup> (9.5 mg, 6.3  $\mu$ mol, 79%). <sup>1</sup>H NMR (600 MHz, CDCl<sub>3</sub>, 25 °C):  $\delta$  = 1.64 (br s, 18H, *tert*-butyl) and 1.58 (br s, 36H, *tert*-butyl) ppm; UV/Vis (CH<sub>2</sub>Cl<sub>2</sub>):  $\lambda_{\max}$  ( $\epsilon$  [M<sup>-1</sup>cm<sup>-1</sup>]) = 403 (5.34 × 10<sup>4</sup>), 467 (7.01 × 10<sup>4</sup>), 543 (1.93 × 10<sup>4</sup>), 609 (1.19 × 10<sup>4</sup>), 677 (1.19 × 10<sup>4</sup>), 1092 nm (1.11 × 10<sup>4</sup>), and 1583 nm (7.05 × 10<sup>2</sup>).

**$\beta$ -Dichloro diphenylamine-fused porphyrin 14.** 10Ni (11.0 mg, 10  $\mu$ mol) was dissolved in CHCl<sub>3</sub> (2.0 mL). The mixture was stirred at 0 °C, and Palau'Chlor (0.5 mL, 21  $\mu$ mol, 42 mM CHCl<sub>3</sub> solution) was added dropwise over 10 min. Then, the mixture was stirred at room temperature for 7 h. The reaction mixture was diluted with CH<sub>2</sub>Cl<sub>2</sub> and filtered through a small plug of silica gel with copious washings (CH<sub>2</sub>Cl<sub>2</sub>). After removal of the solvent *in vacuo*, recrystallization from CH<sub>2</sub>Cl<sub>2</sub>/MeOH gave **14** (10.1 mg, 8.7  $\mu$ mol, 87%). <sup>1</sup>H NMR (600 MHz, CDCl<sub>3</sub>, 25 °C):  $\delta$  = 9.63 (d,  $J$  = 7.8 Hz, 2H, diphenylamine), 8.81 (d,  $J$  = 5.0 Hz, 2H,  $\beta$ ), 8.74 (d,  $J$  = 7.8 Hz, 2H, diphenylamine), 8.61 (d,  $J$  = 5.0 Hz, 2H,  $\beta$ ), 7.86 (d,  $J$  = 1.9 Hz, 2H, Ar), 7.75 (t,  $J$  = 1.9 Hz, 2H, Ar), 7.70 (t,  $J$  = 1.9 Hz, 1H, Ar), 7.68 (t,  $J$  = 7.8 Hz, 2H, diphenylamine), 7.62 (t,  $J$  = 7.8 Hz, 2H, diphenylamine), 1.50 (br s, 36H, *tert*-butyl), and 1.48 (s, 18H, *tert*-butyl) ppm (The signals for the some protons of the 3,5-di-*tert*-butylphenyl groups are too broad to analyze because of flapping of the porphyrin skeleton.); <sup>13</sup>C NMR (151 MHz, CDCl<sub>3</sub>, 25 °C):  $\delta$  = 149.33, 149.27, 146.05, 143.48, 140.07, 139.08, 137.60, 134.33, 133.14, 131.07, 128.84, 128.34, 126.65, 126.48, 126.24, 124.71 (overlap), 122.97, 122.31, 121.14, 121.10,

119.33, 117.98, 116.19, 115.78, 35.18, 35.15, and 31.85 (overlap); APCI-TOF-MS:  $m/z = 1161.4719$ . Calcd for  $C_{74}H_{75}N_5^{58}Ni^{35}Cl_2$ : 1161.4758 [M]<sup>-</sup>; UV/Vis (CH<sub>2</sub>Cl<sub>2</sub>):  $\lambda_{max}$  ( $\epsilon$  [M<sup>-1</sup>cm<sup>-1</sup>]) = 453 ( $1.86 \times 10^5$ ), 570 ( $1.40 \times 10^5$ ), and 615 nm ( $3.27 \times 10^4$ ).

**$\beta$ -Dichloro diphenylamine-fused Ni(II) porphyrinium hexachloroantimonate [14]<sup>+</sup>.** **14** (17.5 mg, 15.0  $\mu$ mol) was dissolved in CH<sub>2</sub>Cl<sub>2</sub> (10 mL). The mixture was stirred at room temperature, and tris(4-bromophenyl)aminium hexachloroantimonate (13.5 mg, 16.5  $\mu$ mol) was added to the mixture. Then, the mixture was stirred at room temperature in air for 5 min. The reaction mixture was diluted with CH<sub>2</sub>Cl<sub>2</sub> and filtered through a small plug of silica gel with copious washings (CH<sub>2</sub>Cl<sub>2</sub>). After removal of the solvent *in vacuo*, recrystallization from CH<sub>2</sub>Cl<sub>2</sub>/hexane gave **[14]<sup>+</sup>** (20.5 mg, 13.7  $\mu$ mol, 91%). <sup>1</sup>H NMR (600 MHz, CDCl<sub>3</sub>, 25 °C):  $\delta = 1.61$  (br s, 18H, *tert*-butyl) and 1.57 (br s, 36H, *tert*-butyl) ppm; UV/Vis (CH<sub>2</sub>Cl<sub>2</sub>):  $\lambda_{max}$  ( $\epsilon$  [M<sup>-1</sup>cm<sup>-1</sup>]) = 441 ( $7.19 \times 10^4$ ), 460 ( $8.00 \times 10^4$ ), 543 ( $2.26 \times 10^4$ ), 663 ( $1.45 \times 10^4$ ), and 903 nm ( $8.89 \times 10^3$ ).

### 3. Compound Data

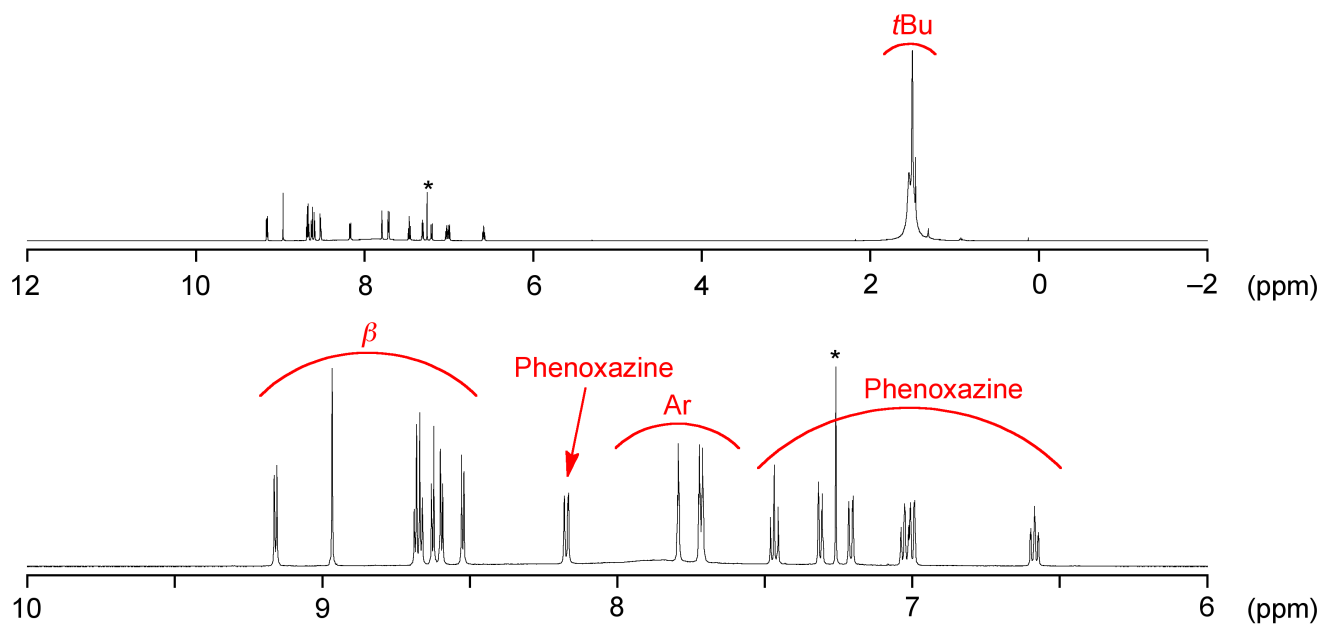

Figure S 1. <sup>1</sup>H NMR spectrum of **9** in CDCl<sub>3</sub> at 60 °C. \*Solvent.

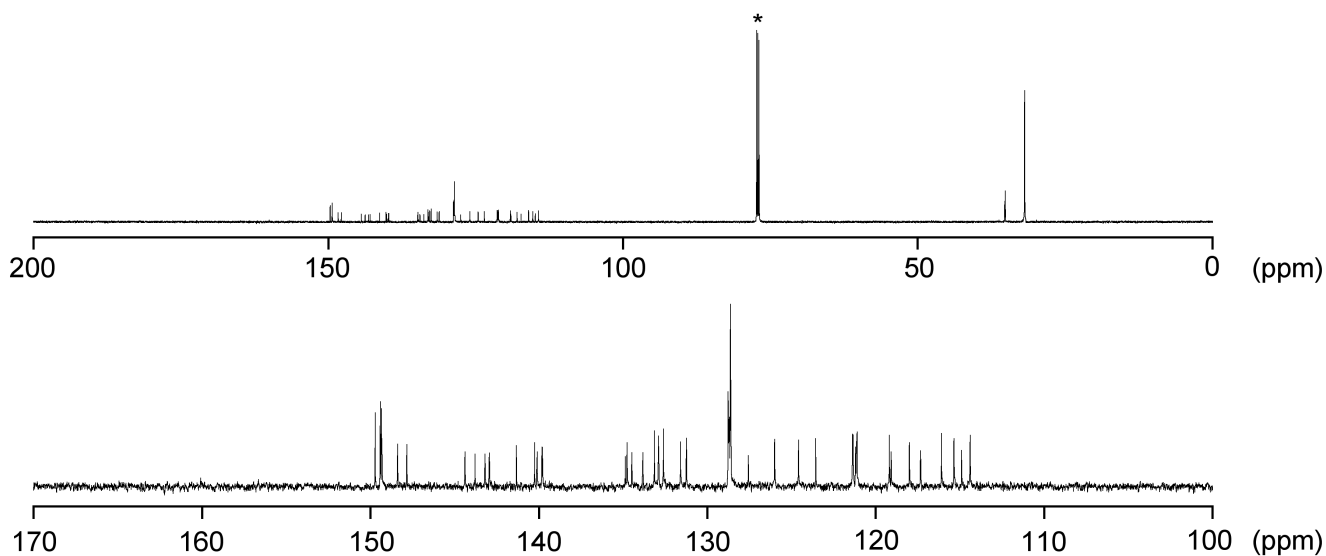

Figure S 2. <sup>13</sup>C NMR spectrum of **9** in CDCl<sub>3</sub> at 60 °C. \*Solvent.

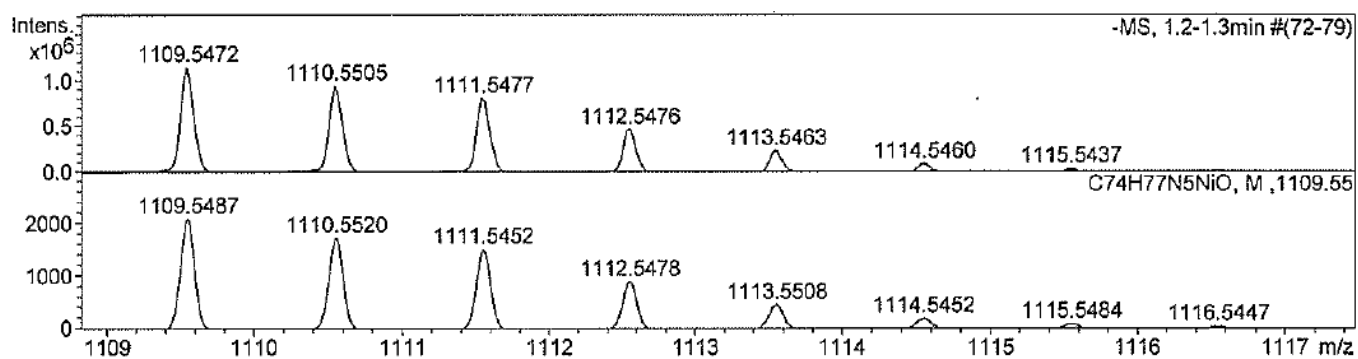

Figure S 3. Observed (top) and simulated (bottom) HR-APCI-TOF MS of 9.

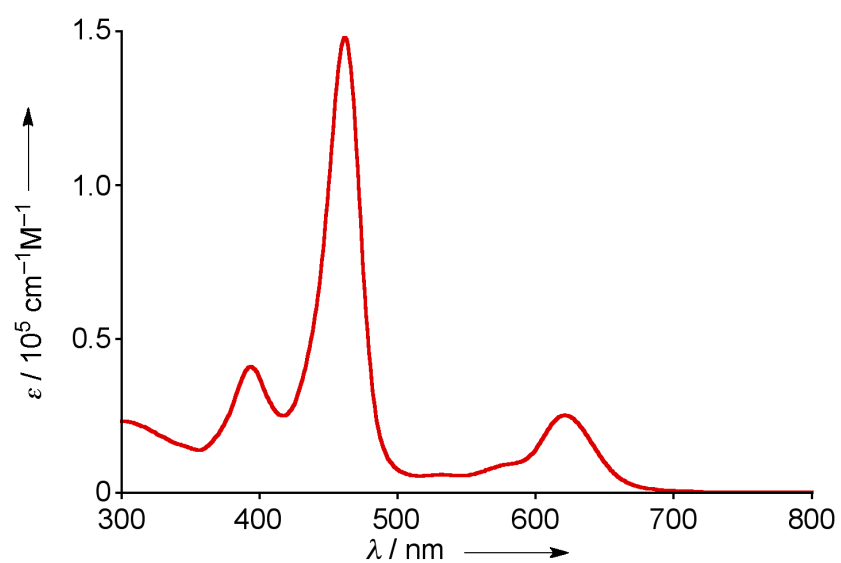

Figure S 4. UV/Vis absorption spectrum of 9 in CH<sub>2</sub>Cl<sub>2</sub>.

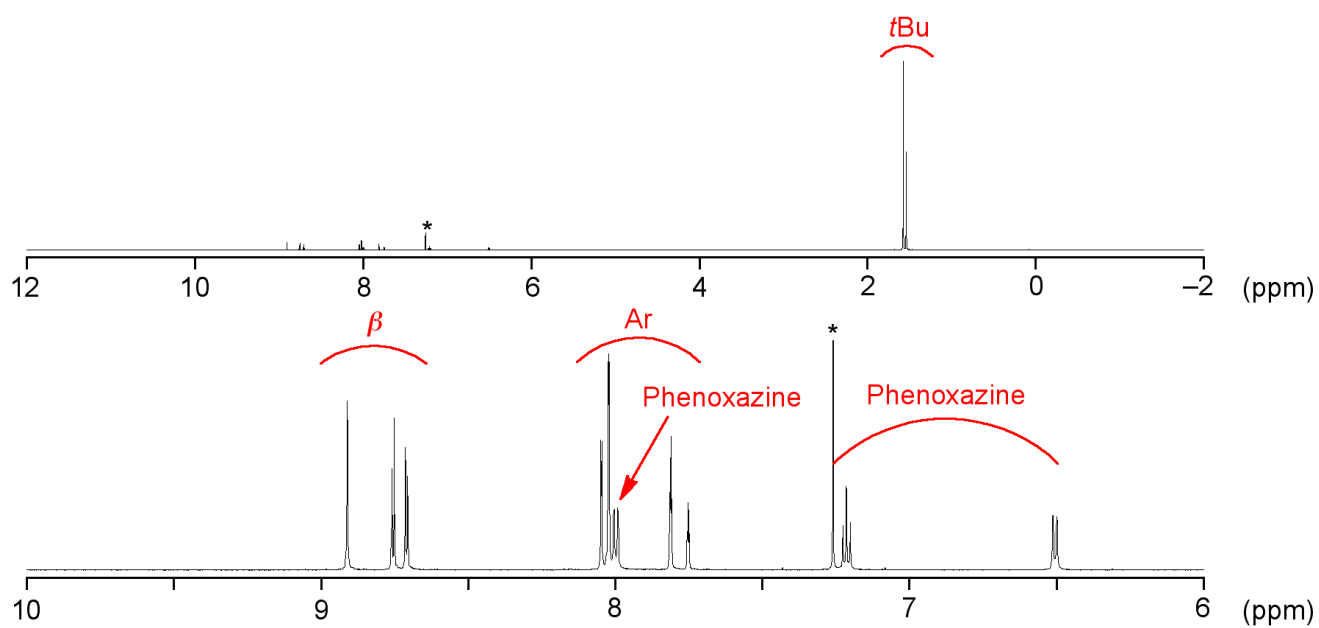

Figure S 5.  $^1\text{H}$  NMR spectrum of **4Ni** in  $\text{CDCl}_3$  at  $25^\circ\text{C}$ . \*Solvent.

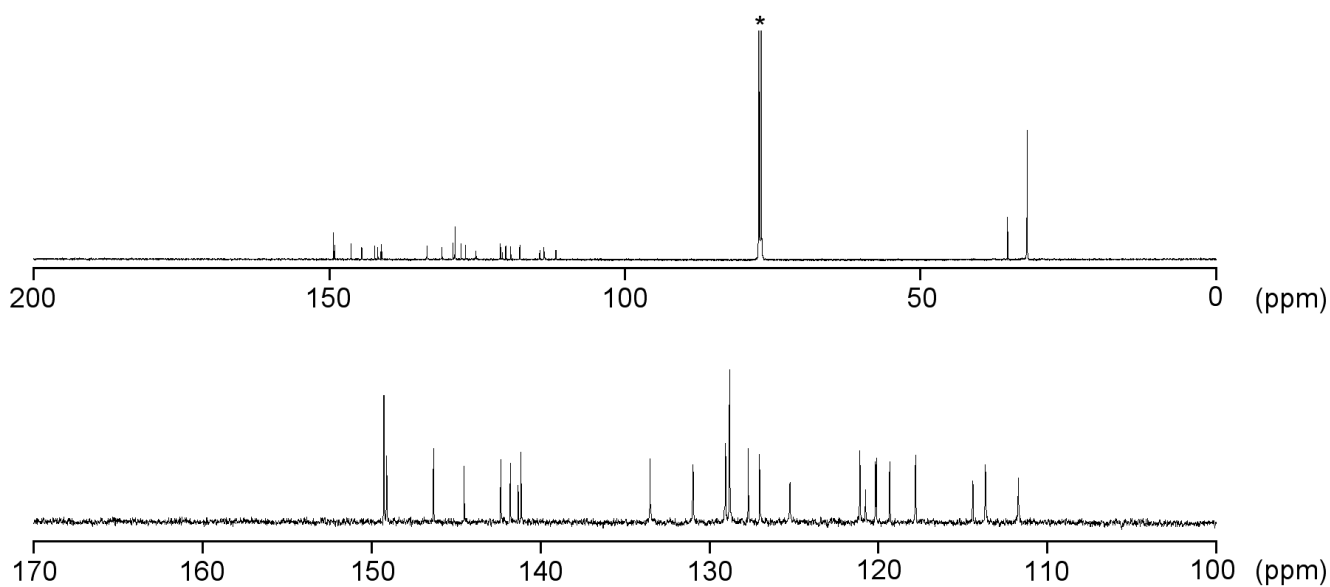

Figure S 6.  $^{13}\text{C}$  NMR spectrum of **4Ni** in  $\text{CDCl}_3$  at  $25^\circ\text{C}$ . \*Solvent.

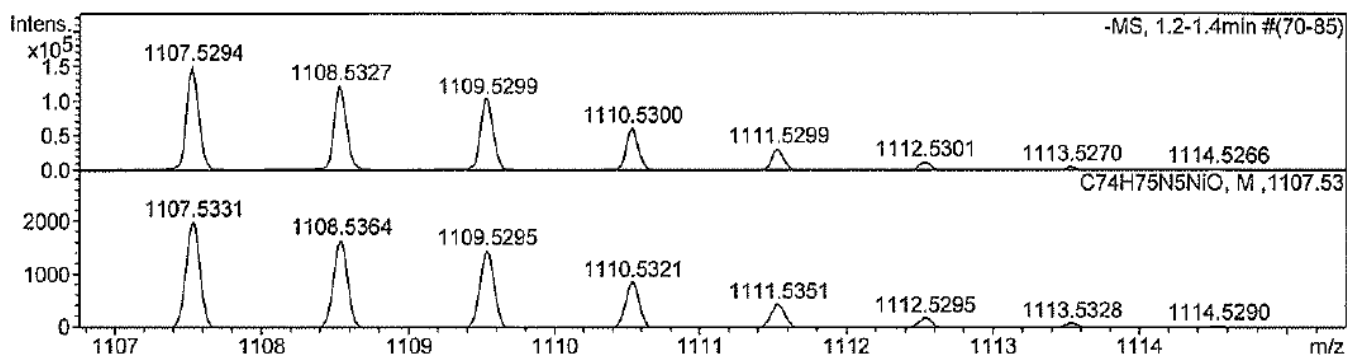

Figure S 7. Observed (top) and simulated (bottom) HR-APCI-TOF MS of **4Ni**.

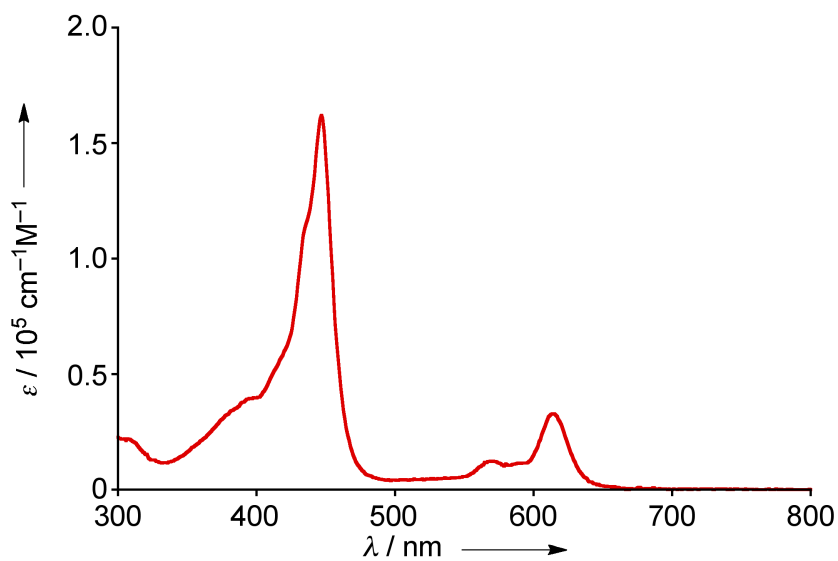

Figure S 8. UV/Vis absorption spectrum of **4Ni** in  $\text{CH}_2\text{Cl}_2$ .

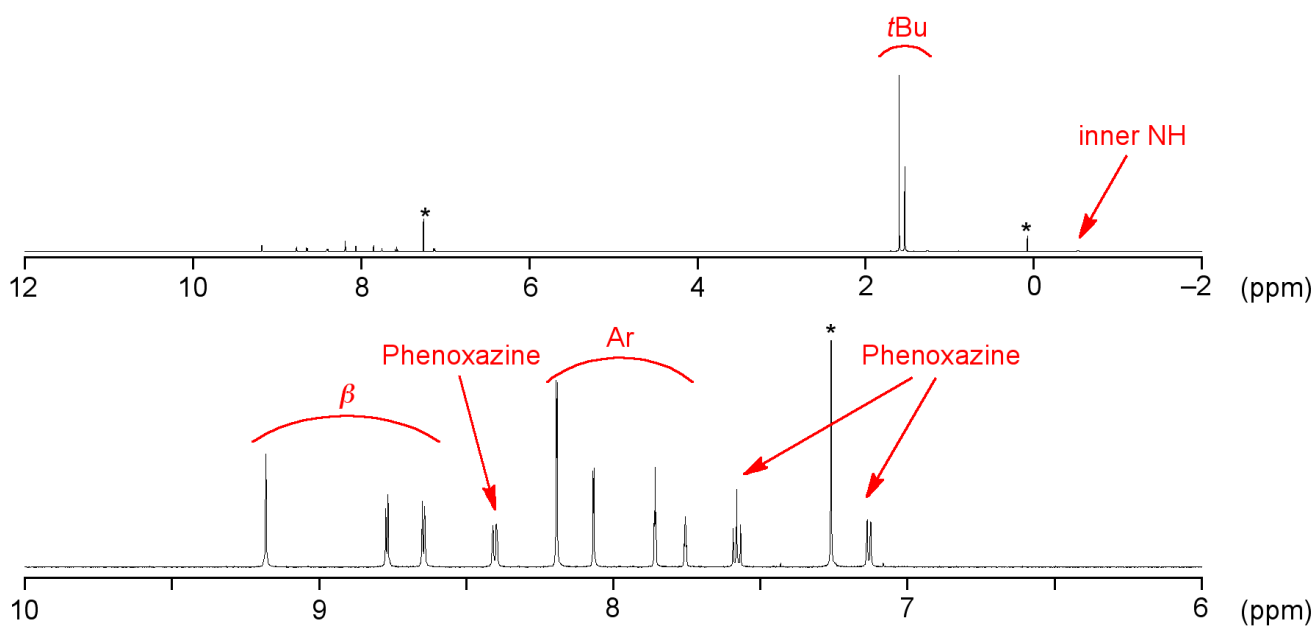

Figure S 9.  $^1\text{H}$  NMR spectrum of **4H<sub>2</sub>** in  $\text{CDCl}_3$  at  $25\text{ }^\circ\text{C}$ . \*Solvent and impurities.

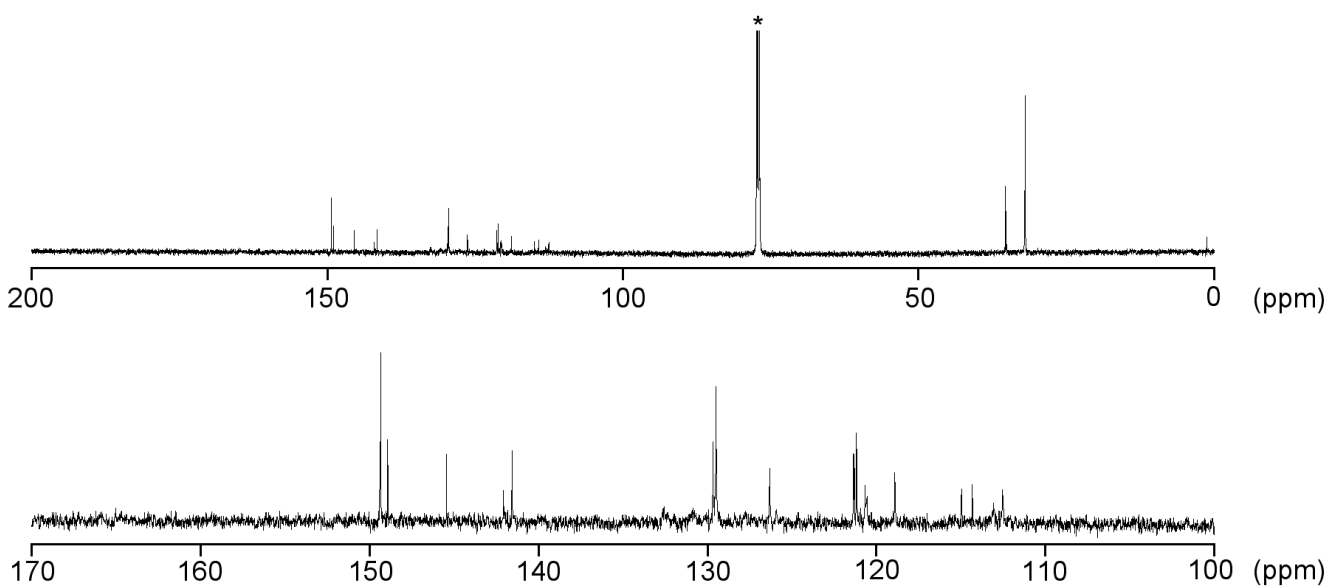

Figure S 10.  $^{13}\text{C}$  NMR spectrum of **4H<sub>2</sub>** in  $\text{CDCl}_3$  at  $25\text{ }^\circ\text{C}$ . \*Solvent.



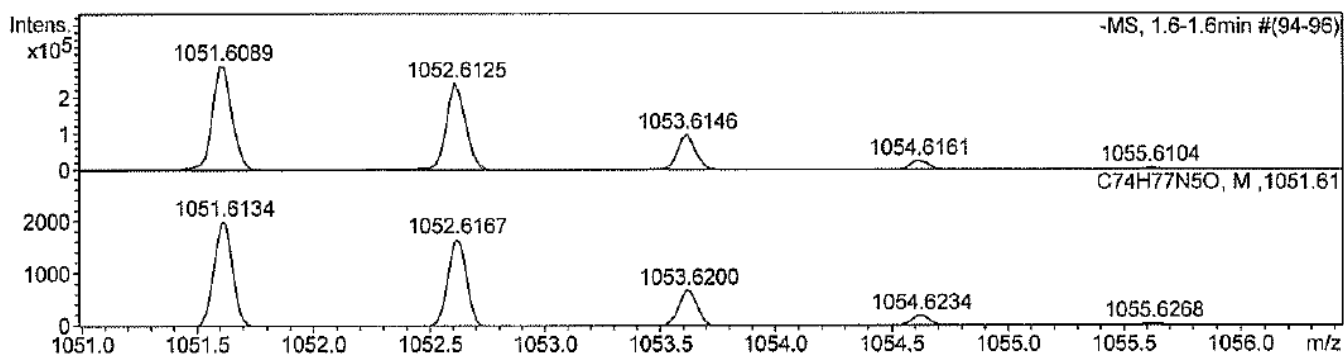

Figure S 11. Observed (top) and simulated (bottom) HR-APCI-TOF MS of **4H<sub>2</sub>**.

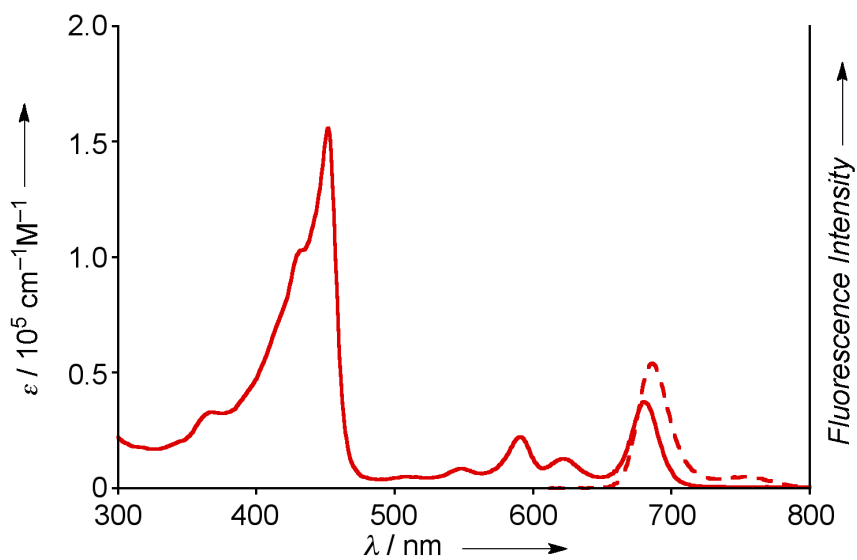

Figure S 12. UV/Vis absorption (solid line) and emission (dashed line) spectra of **4H<sub>2</sub>** in CH<sub>2</sub>Cl<sub>2</sub>.

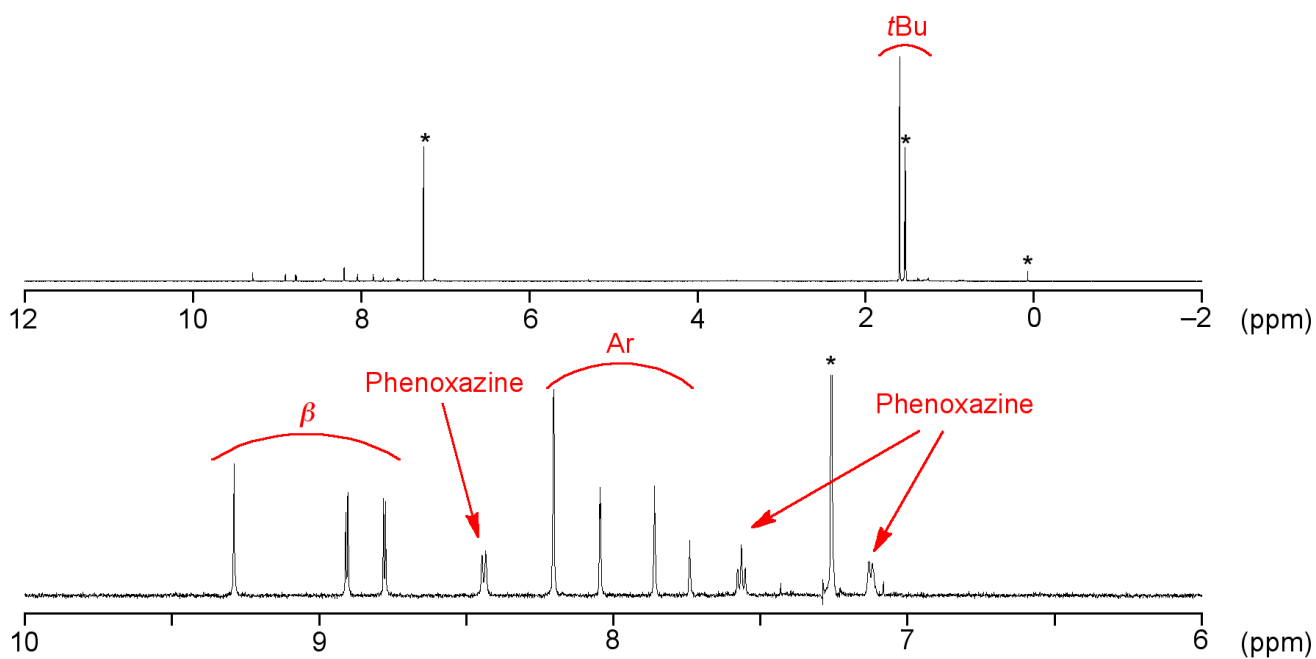

Figure S 13.  $^1\text{H}$  NMR spectrum of **4Zn** in  $\text{CDCl}_3$  at 25 °C. \*Solvent.

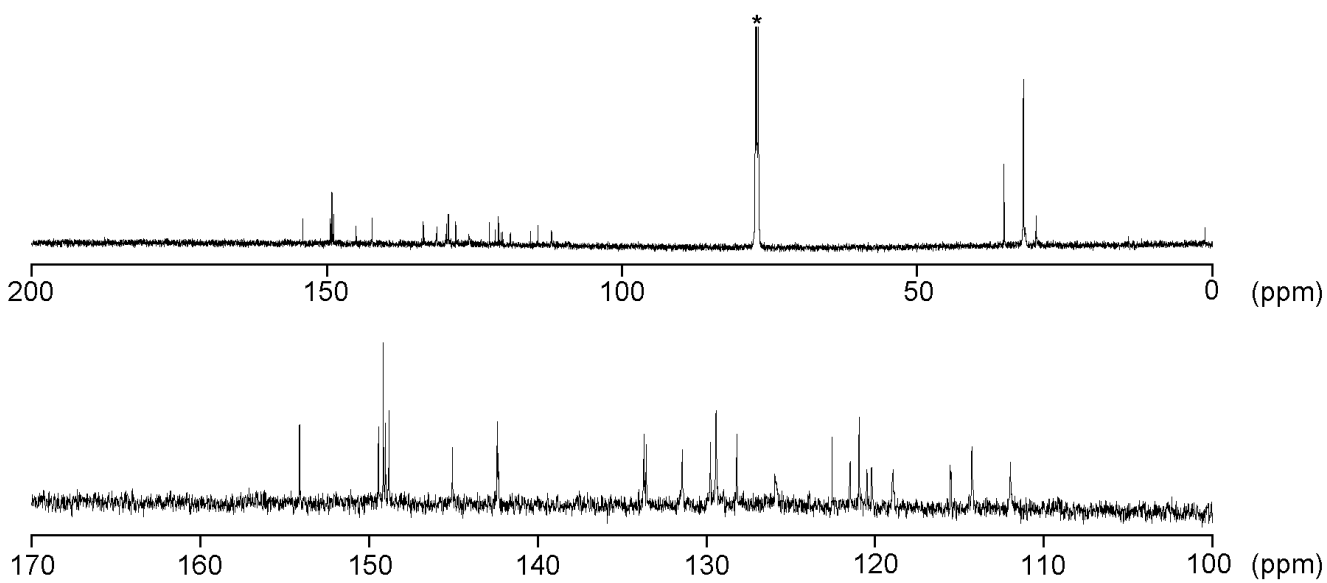

Figure S 14.  $^{13}\text{C}$  NMR spectrum of **4Zn** in  $\text{CDCl}_3$  at 25 °C. \*Solvent.

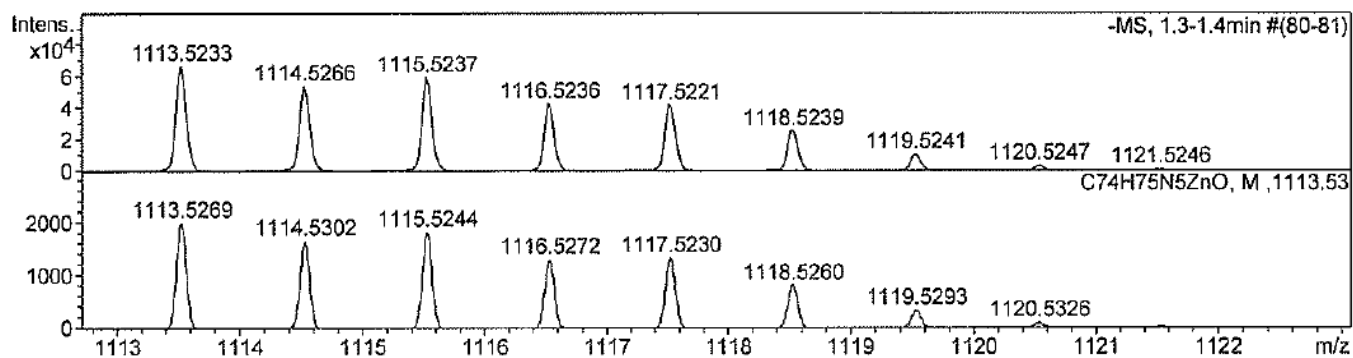

Figure S 15. Observed (top) and simulated (bottom) HR-APCI-TOF MS of **4Zn**.

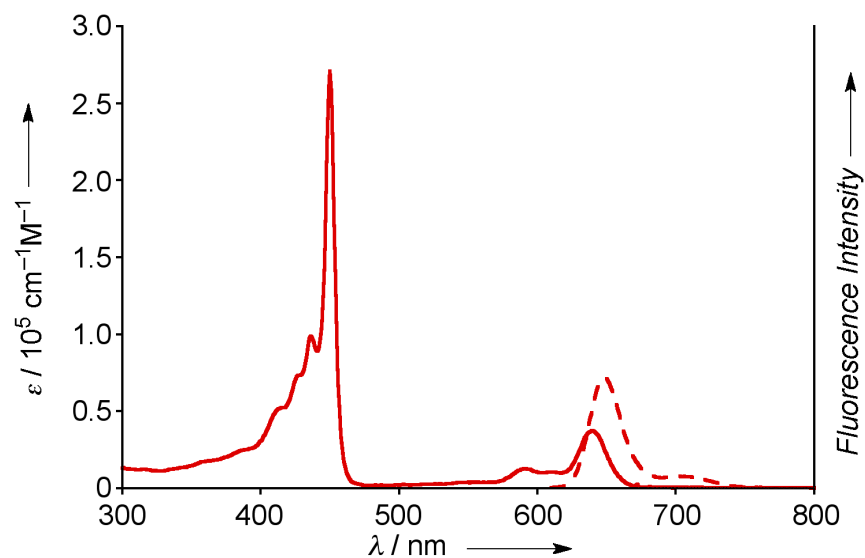

Figure S 16. UV/Vis absorption (solid line) and emission (dashed line) spectra of **4Zn** in  $\text{CH}_2\text{Cl}_2$ .

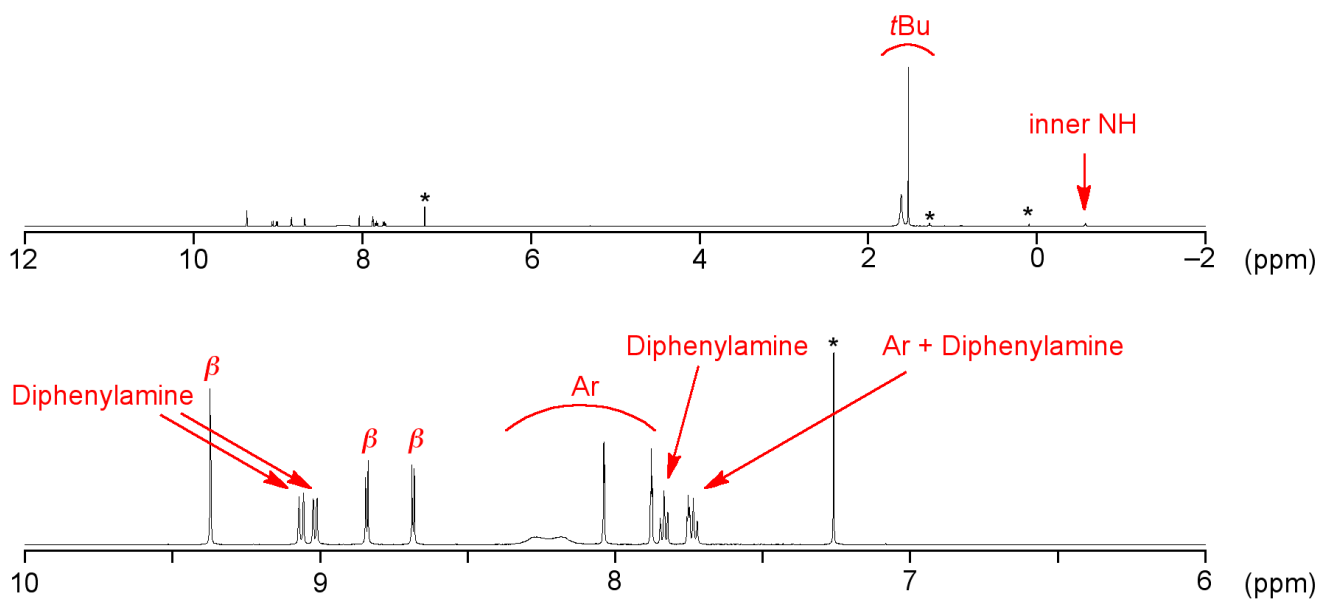

Figure S 17.  $^1\text{H}$  NMR spectrum of  $10\text{H}_2$  in  $\text{CDCl}_3$  at  $25^\circ\text{C}$ . \*Solvent and impurities.

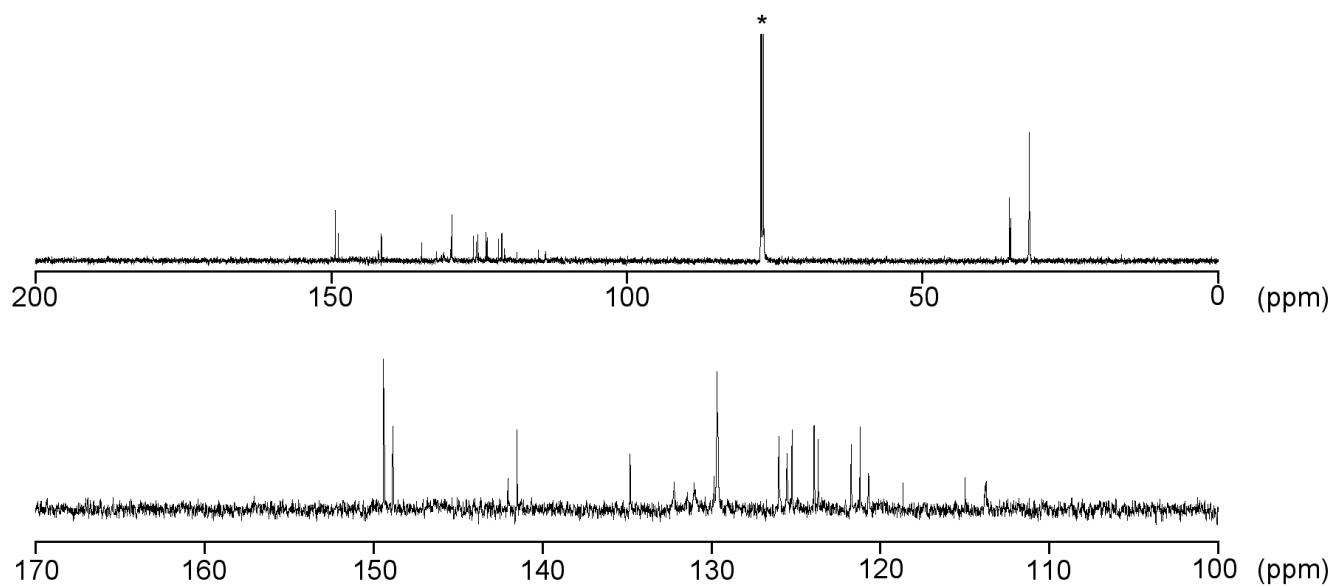

Figure S 18.  $^{13}\text{C}$  NMR spectrum of  $10\text{H}_2$  in  $\text{CDCl}_3$  at  $25^\circ\text{C}$ . \*Solvent.

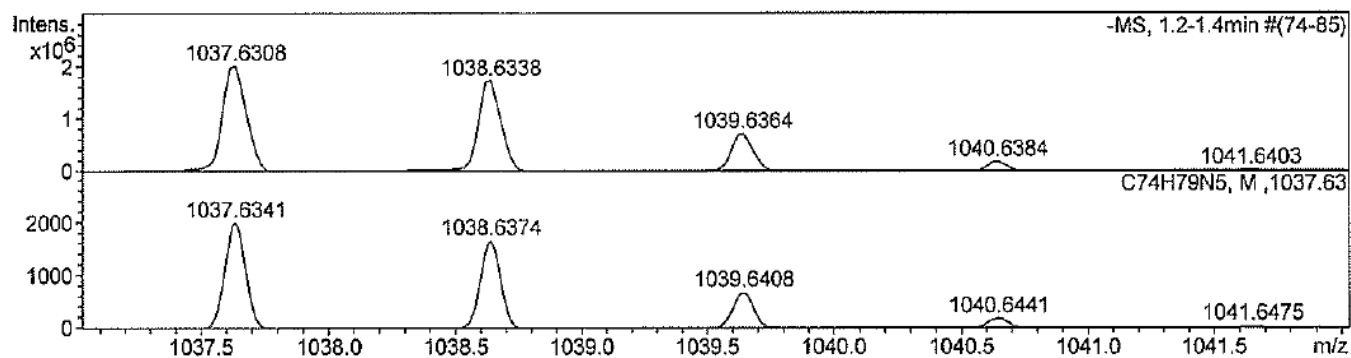

Figure S 19. Observed (top) and simulated (bottom) HR-APCI-TOF MS of **10H<sub>2</sub>**.

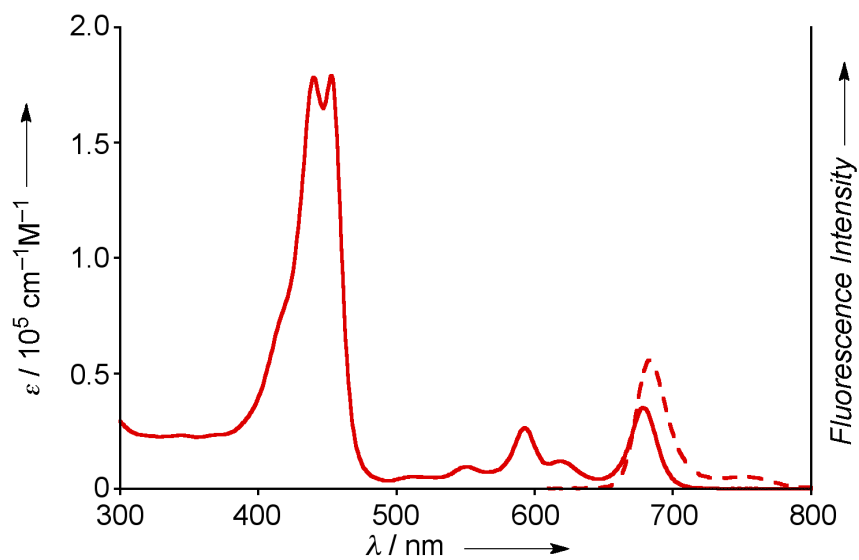

Figure S 20. UV/Vis absorption (solid line) and emission (dashed line) spectra of **10H<sub>2</sub>** in CH<sub>2</sub>Cl<sub>2</sub>.

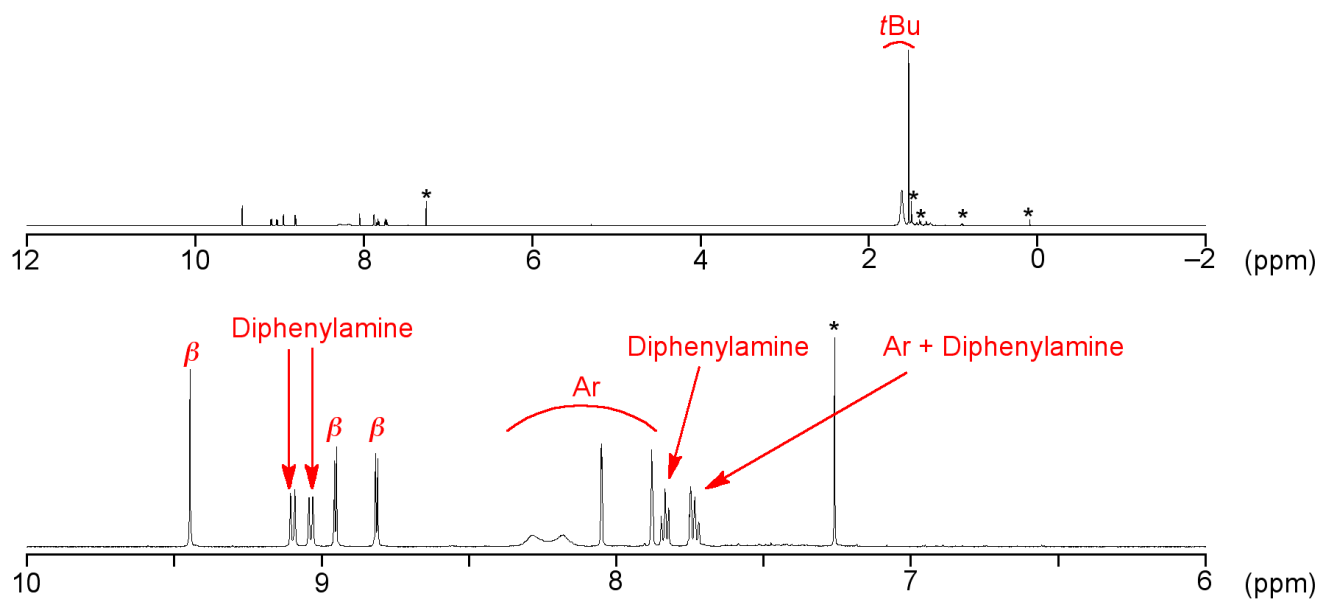

Figure S 21.  $^1\text{H}$  NMR spectrum of **10Zn** in  $\text{CDCl}_3$  at 25 °C. \*Solvent and impurities.

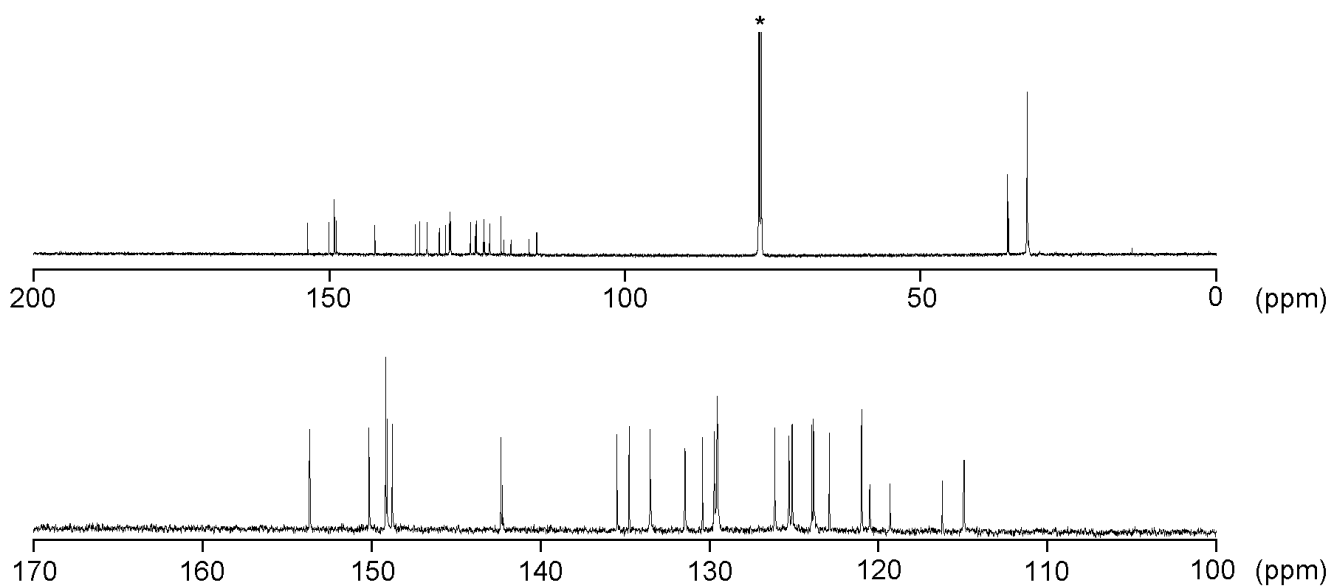

Figure S 22.  $^{13}\text{C}$  NMR spectrum of **10Zn** in  $\text{CDCl}_3$  at 25 °C. \*Solvent.

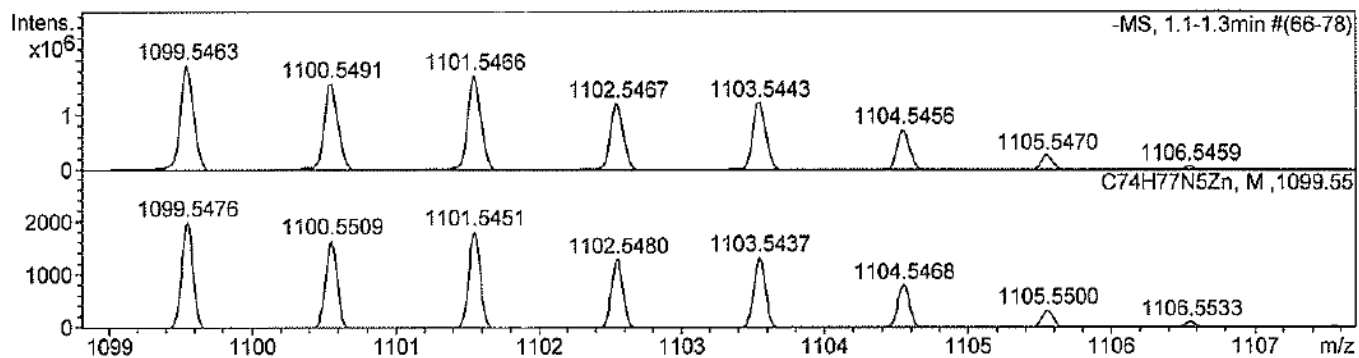

Figure S 23. Observed (top) and simulated (bottom) HR-APCI-TOF MS of **10Zn**.

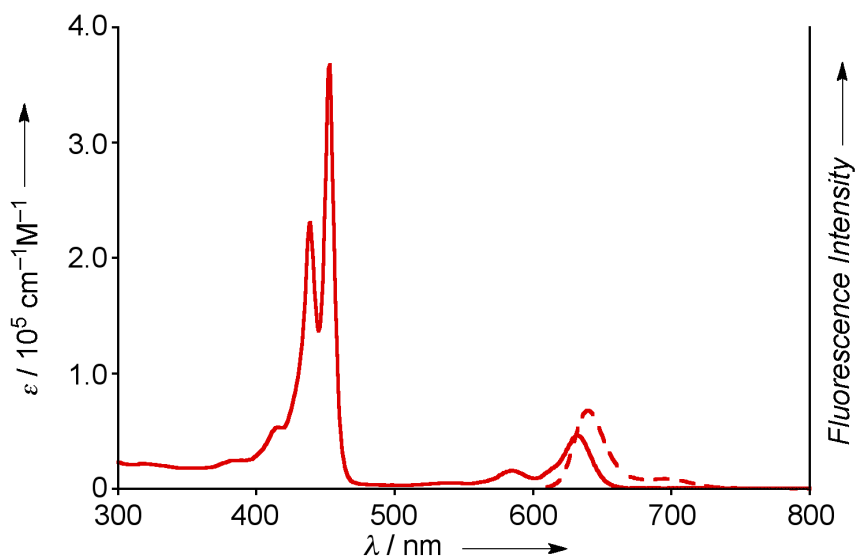

Figure S 24. UV/Vis absorption (solid line) and emission (dashed line) spectra of **10Zn** in  $\text{CH}_2\text{Cl}_2$ .

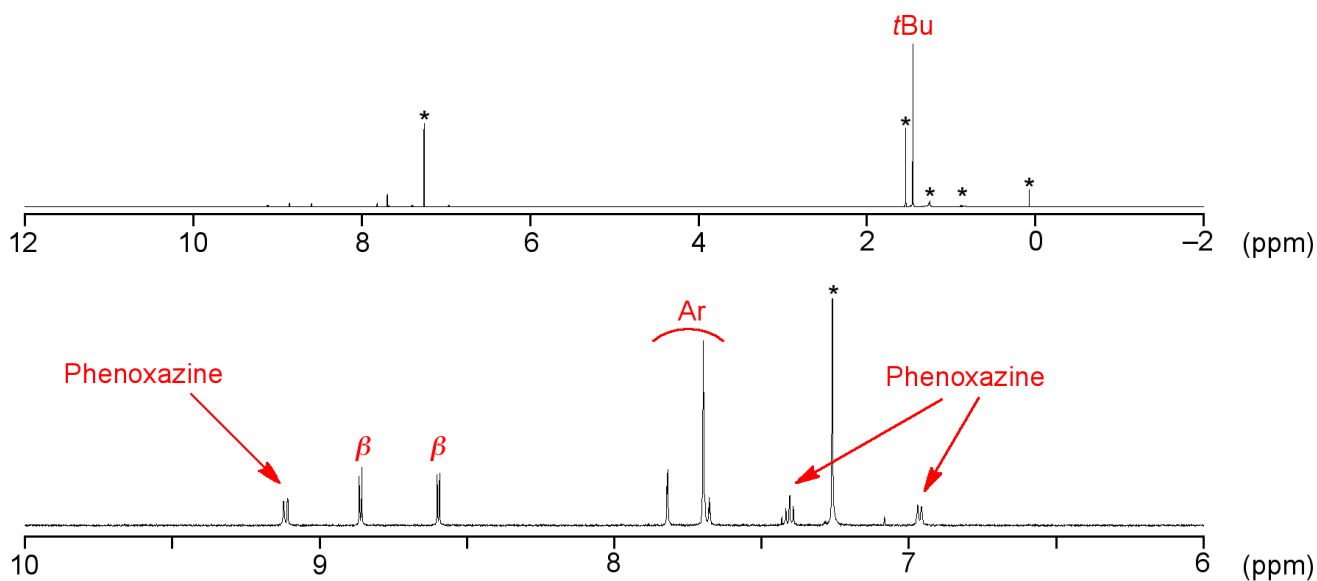

Figure S 25.  $^1\text{H}$  NMR spectrum of **13** in  $\text{CDCl}_3$  at  $25^\circ\text{C}$ . \*Solvent and impurities.

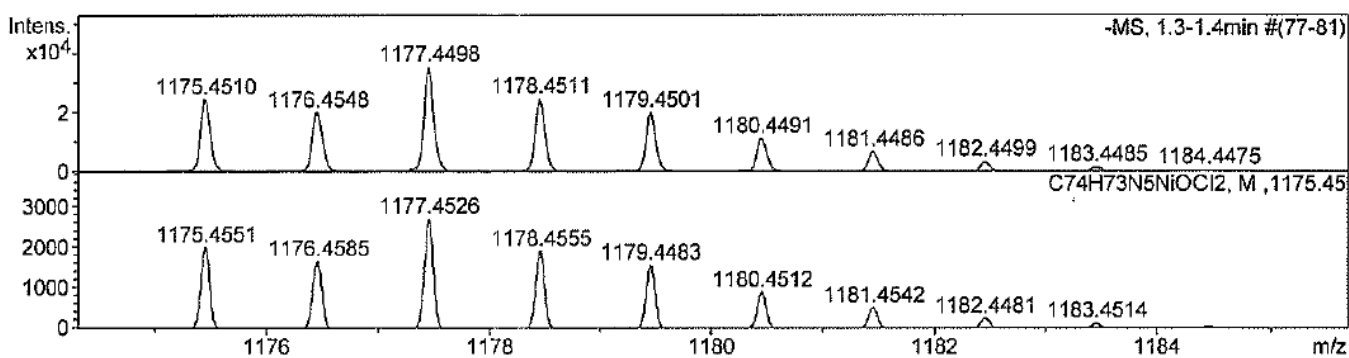

Figure S 26. Observed (top) and simulated (bottom) HR-APCI-TOF MS of **13**.

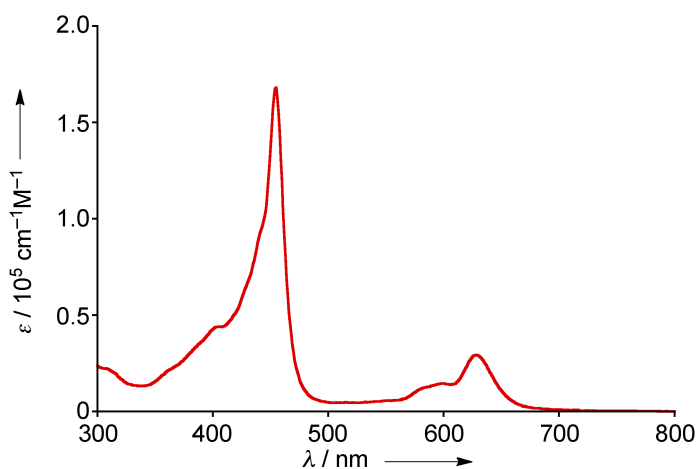

Figure S 27. UV/Vis absorption spectrum of **13** in  $\text{CH}_2\text{Cl}_2$ .



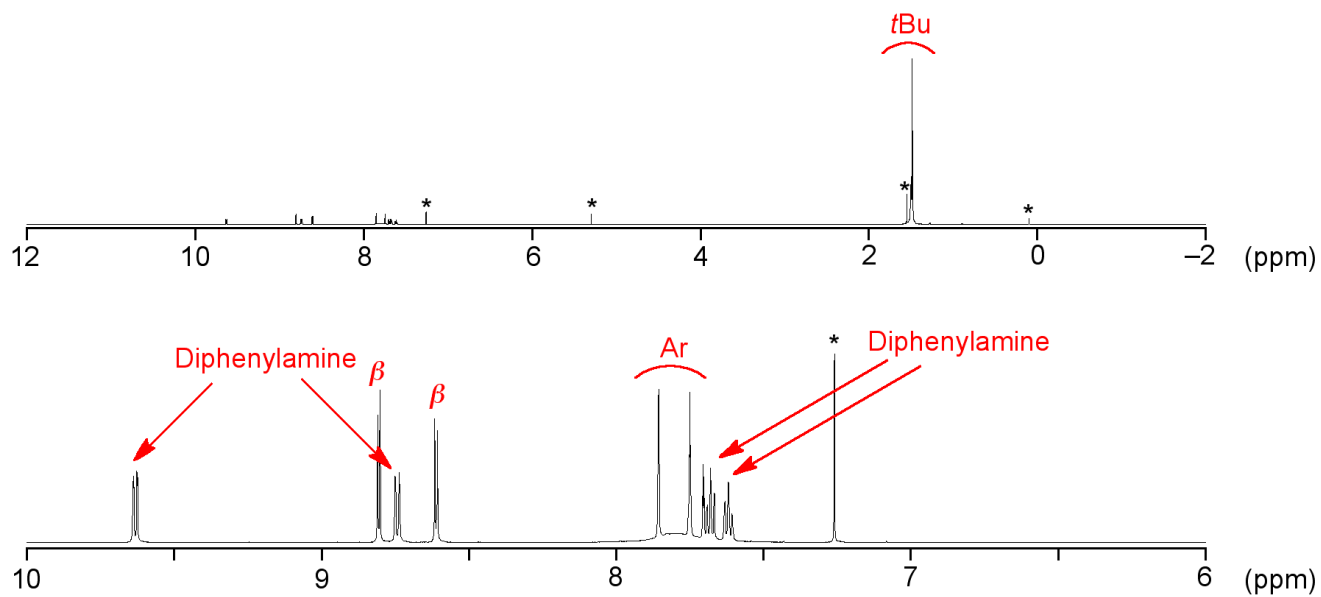

Figure S 28.  $^1\text{H}$  NMR spectrum of **14** in  $\text{CDCl}_3$  at 25 °C. \*Solvent and impurities.

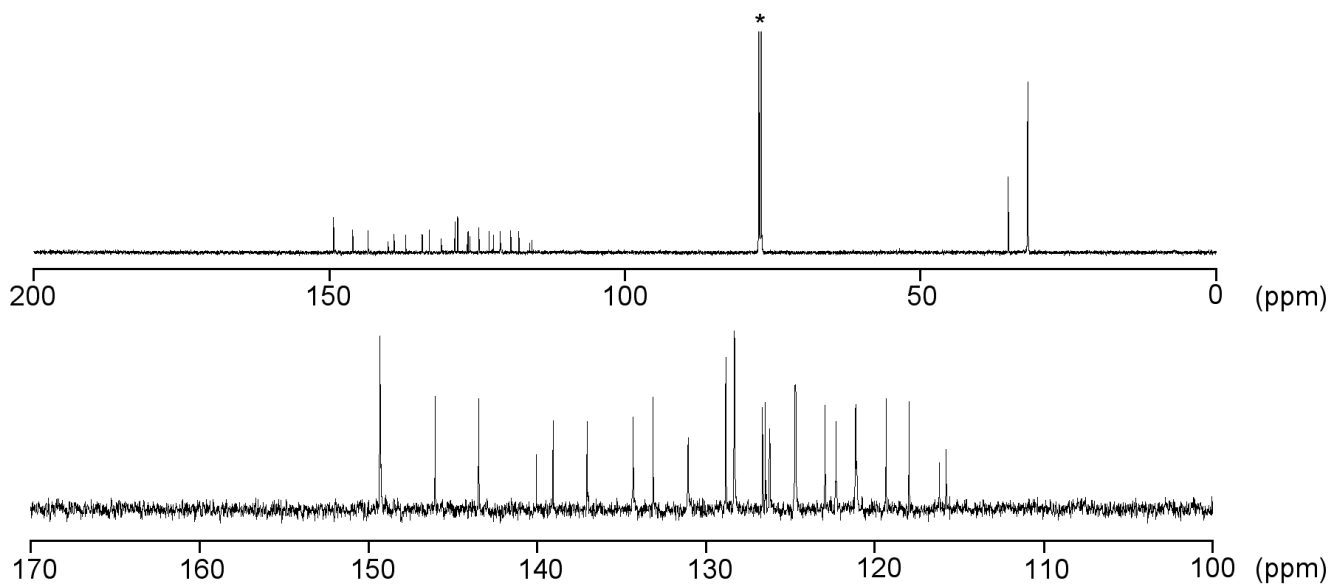

Figure S 29.  $^{13}\text{C}$  NMR spectrum of **14** in  $\text{CDCl}_3$  at 25 °C. \*Solvent.

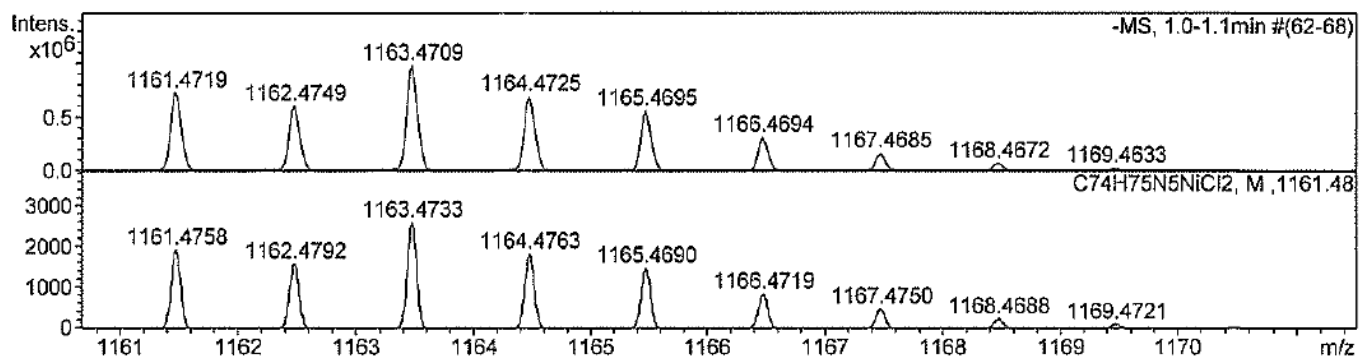

Figure S 30. Observed (top) and simulated (bottom) HR-APCI-TOF MS of **14**.

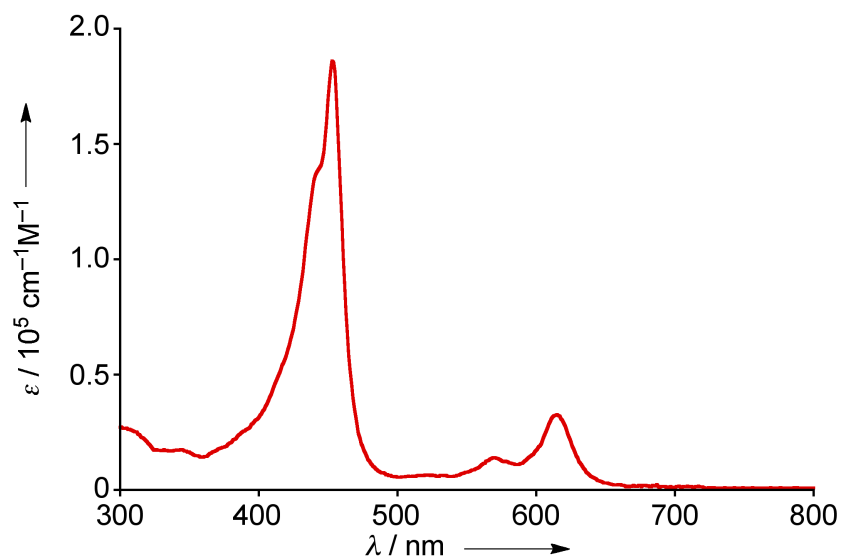

Figure S 31. UV/Vis absorption spectrum of **14** in  $\text{CH}_2\text{Cl}_2$ .

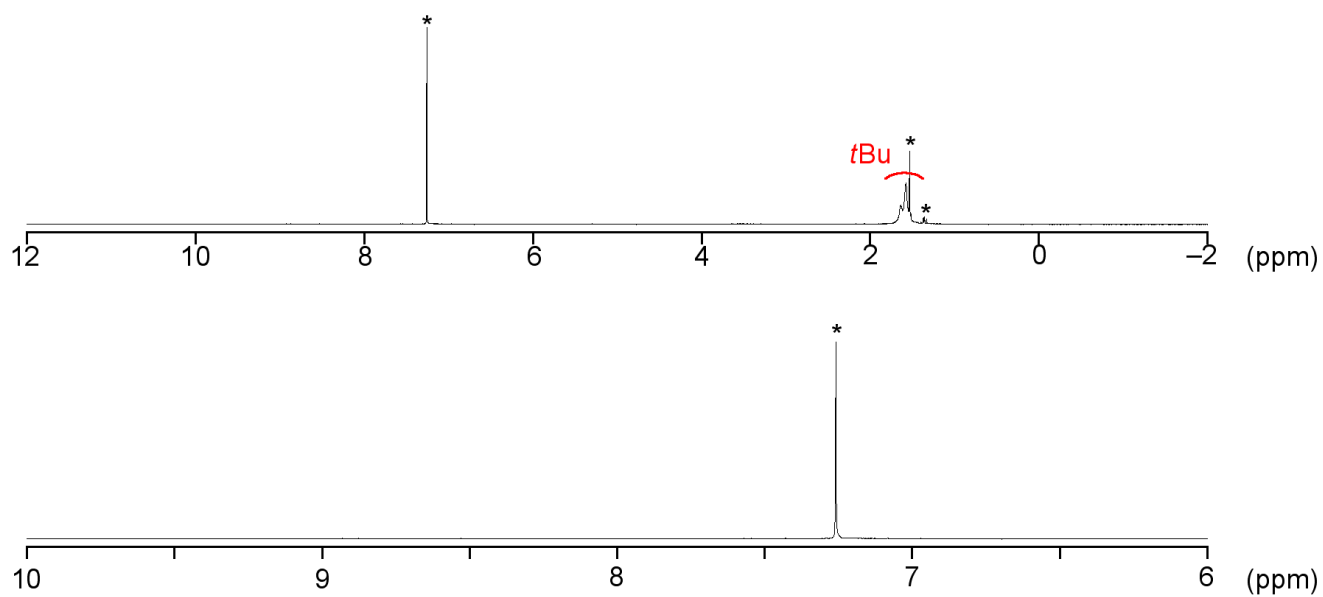

Figure S 32.  $^1\text{H}$  NMR spectrum of  $[\mathbf{13}]^+$  in  $\text{CDCl}_3$  at  $25\text{ }^\circ\text{C}$ . \*Solvent and impurities.

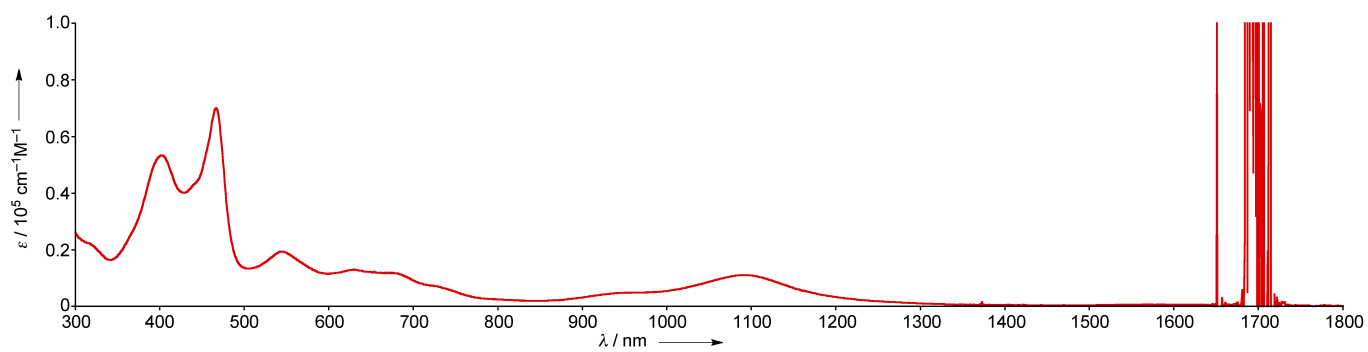

Figure S 33. UV/Vis absorption spectrum of  $[\mathbf{13}]^+$  in  $\text{CH}_2\text{Cl}_2$ .

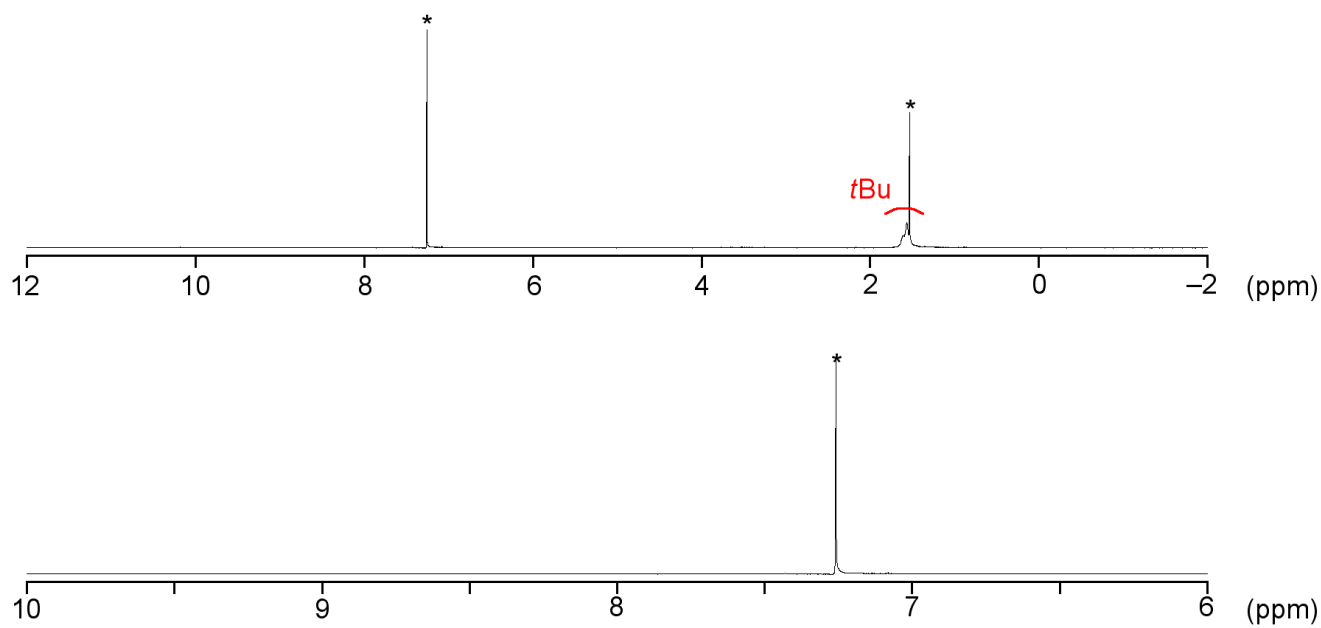

Figure S 34.  $^1\text{H}$  NMR spectrum of  $[\mathbf{14}]^+$  in  $\text{CDCl}_3$  at  $25\text{ }^\circ\text{C}$ . \*Solvent and impurities.

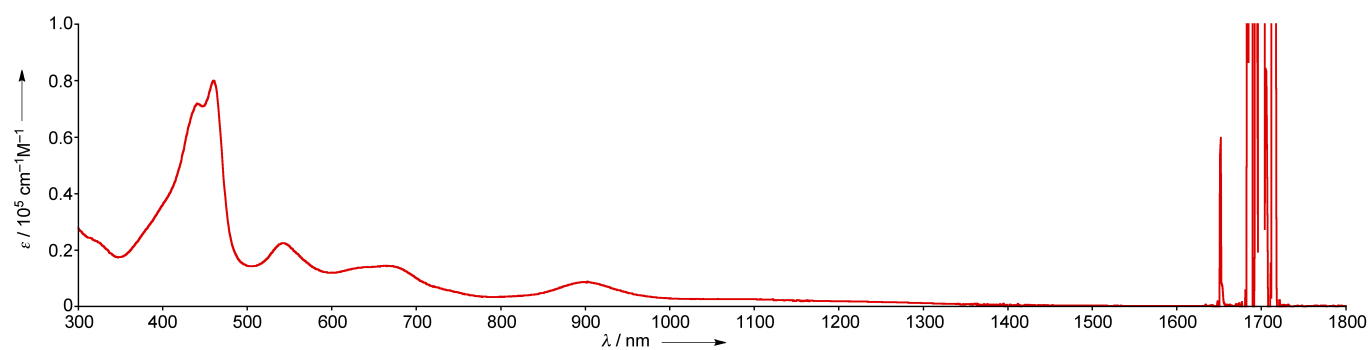

Figure S 35. UV/Vis absorption spectrum of  $[\mathbf{14}]^+$  in  $\text{CH}_2\text{Cl}_2$ .

#### 4. <sup>1</sup>H NMR Dilution Titration<sup>[S2]</sup>

Estimation of the dimerisation constant ( $K_D$ )

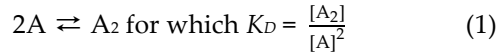

Starting from the *law of mass action* expression for  $K_D$  in Eq. 1, we can write:

$$K_D = \frac{[A_2]}{(C - 2[A_2])^2} \quad (2)$$

where  $[A_2]$  is the dimer concentration and  $C$  is the total concentration of target compound in solution.

Rearrangement of Eq. 2 gives:

$$\frac{1}{2}K_D C = \frac{2[A_2]}{C} + \frac{C}{2[A_2]} - 2 \quad (3)$$

Then, replacing  $\frac{2[A_2]}{C}$  by  $x$  gives Eq. 4.

$$\frac{1}{2}K_D C = x + \frac{1}{x} - 2 \quad (4)$$

Therefore, the value of  $x$ , for which  $0 < x < 1$ , is given by:

$$x = \left(1 + \frac{K_D C}{4}\right) - \sqrt{\left(1 + \frac{K_D C}{4}\right)^2 - 1} \quad (5)$$

The fraction  $x$  is related to the calculated chemical shift  $\delta_{\text{calc}}$  through Eq. 6

$$x = \frac{(\delta_0 - \delta_{\text{calc}})}{(\delta_0 - \delta_{\infty})} \quad (6)$$

where  $\delta_0$  and  $\delta_{\infty}$  are the chemical shifts of the free monomer and dimer, respectively. By using Eq. 5 and Eq. 6,  $\delta_{\text{calc}}$  can be written as:

$$\delta_{\text{calc}} = \delta_0 + (\delta_{\infty} - \delta_0) \left(1 + \frac{1 - \sqrt{8K_D C + 1}}{4K_D C}\right) \quad (6)$$

$K_D$  value was estimated by minimizing the RSS-value (Eq. 7), by iteratively varying  $K_D$ ,  $\delta_0$ , and  $\delta_{\infty}$ , using Solver in Microsoft Excel.

$$RSS = \sum (\delta_{\text{obs}} - \delta_{\text{calc}})^2 \quad (7)$$

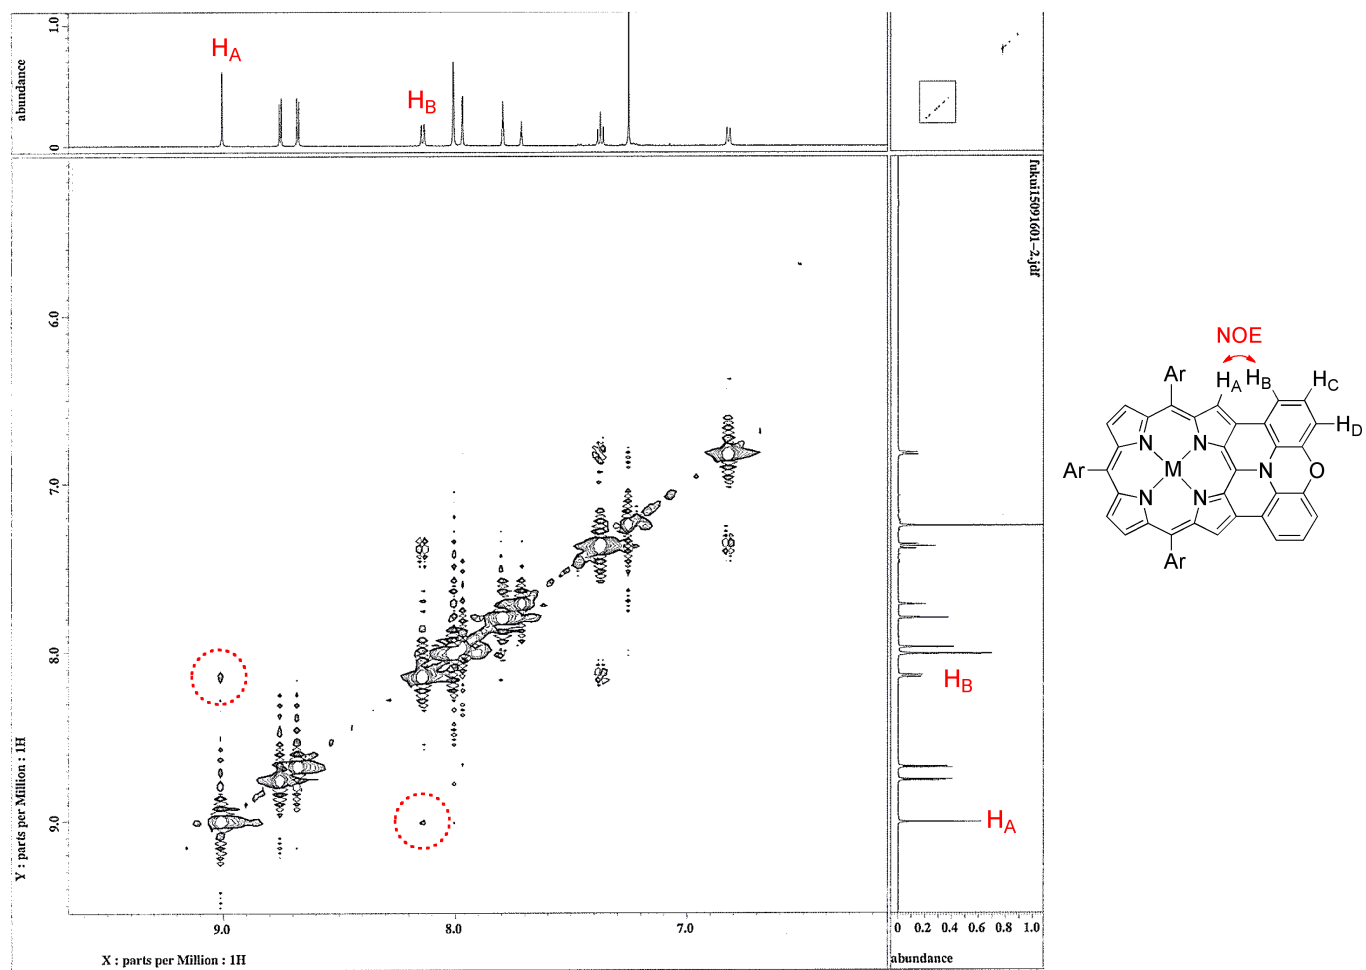

Figure S 36. NOESY spectrum of 4Ni in CDCl<sub>3</sub> at 25 °C.

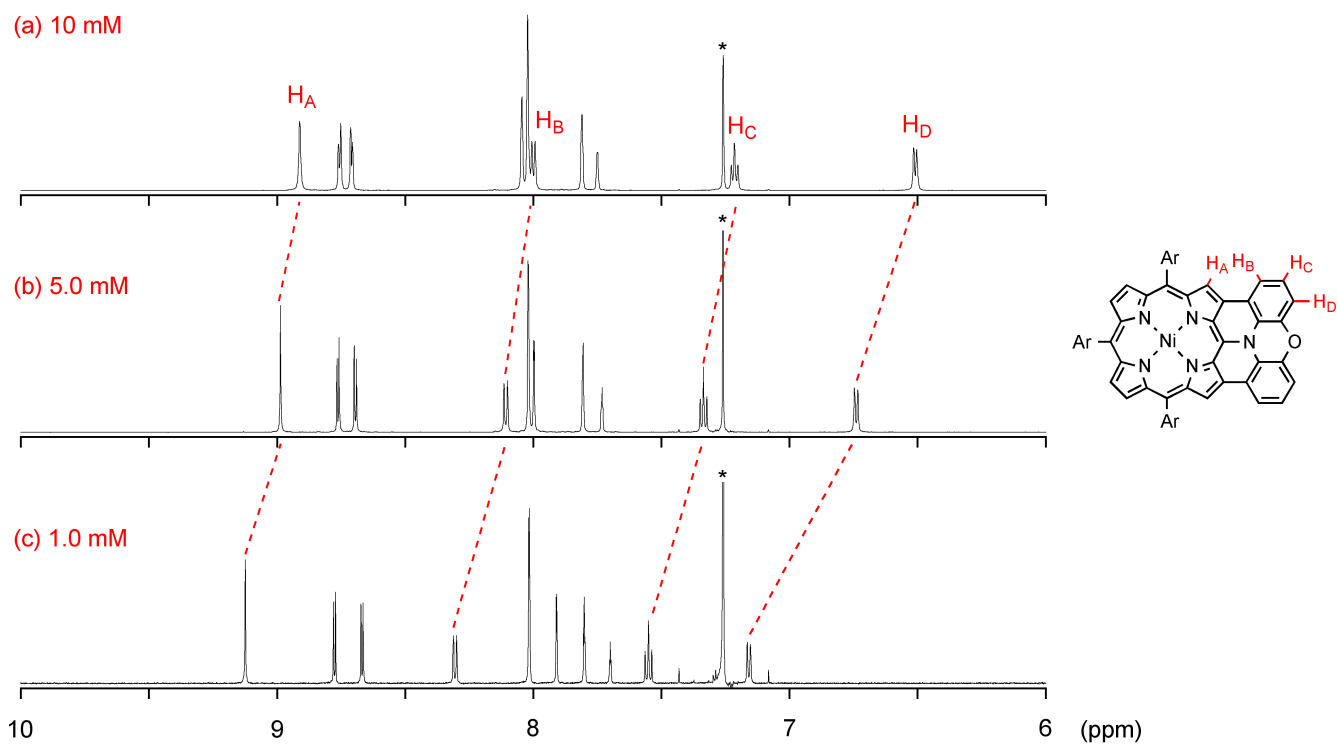

Figure S 37. <sup>1</sup>H NMR spectra of 4Ni in CDCl<sub>3</sub> under different concentrations: (a) 10 mM, (b) 5.0 mM, and (c) 1.0 mM at 25 °C.

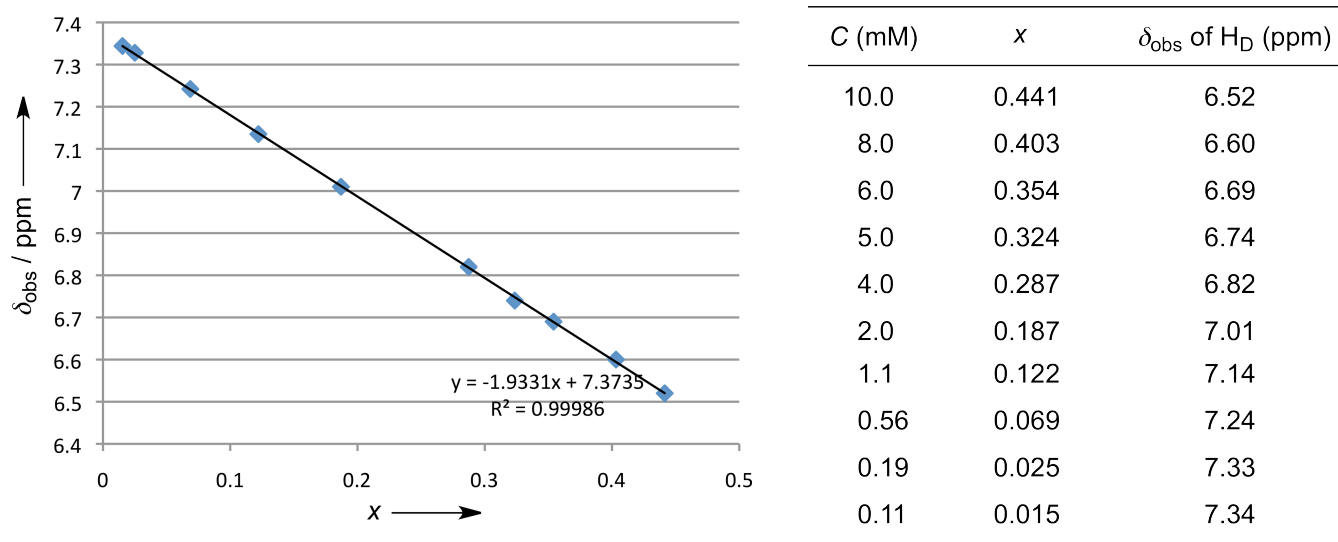

$$K_D = 7.2 \times 10 \text{ M}^{-1}$$

Figure S 38. <sup>1</sup>H NMR dilution titration of 4Ni.

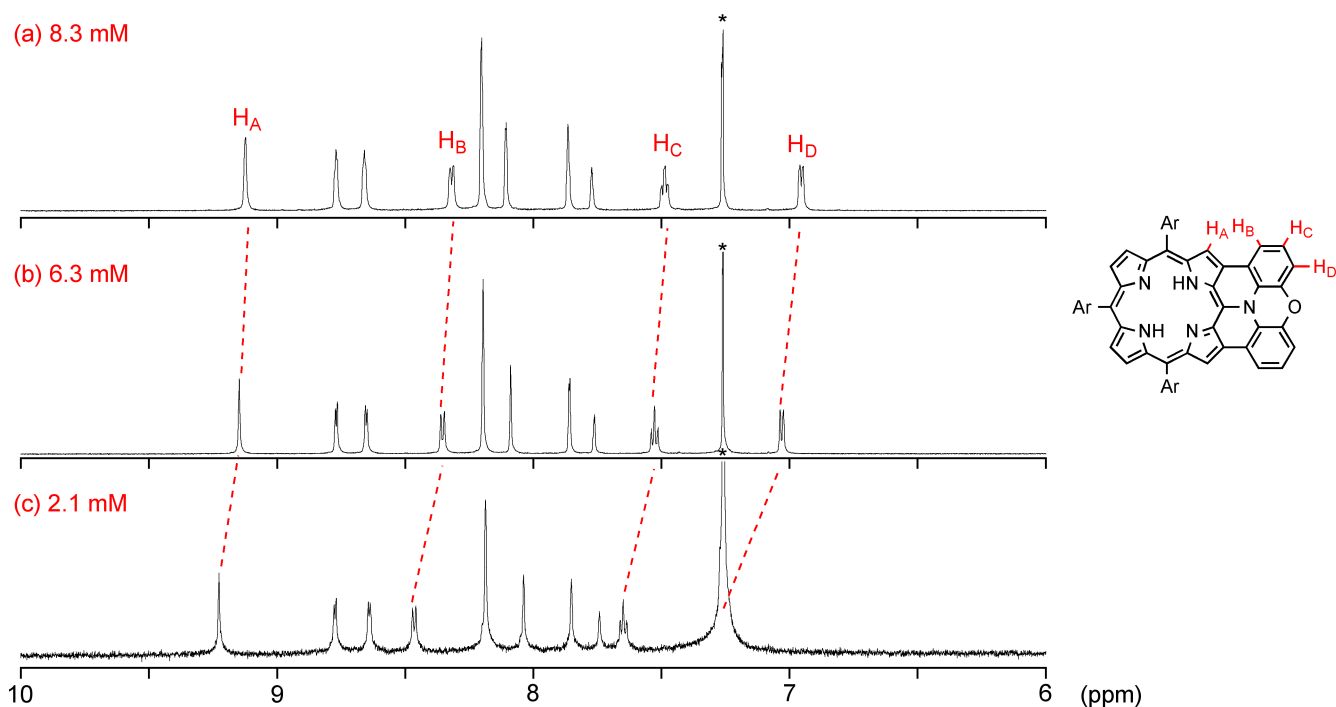

Figure S 39.  $^1\text{H}$  NMR spectra of  $4\text{H}_2$  in  $\text{CDCl}_3$  under different concentrations: (a) 8.3 mM, (b) 6.3 mM, and (c) 2.1 mM at 25  $^\circ\text{C}$ .

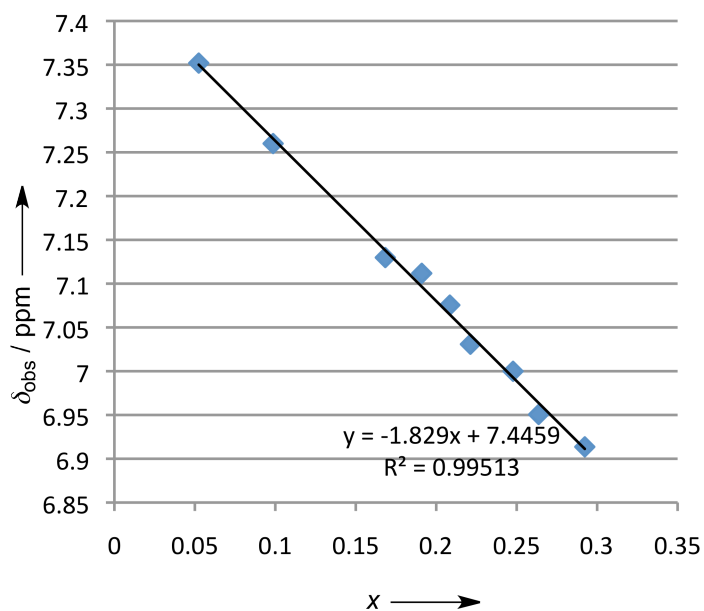

| C (mM) | x     | $\delta_{\text{obs}}$ of $\text{H}_\text{D}$ (ppm) |
|--------|-------|----------------------------------------------------|
| 10.0   | 0.292 | 6.91                                               |
| 8.3    | 0.264 | 6.95                                               |
| 7.5    | 0.245 | 7.00                                               |
| 6.3    | 0.221 | 7.03                                               |
| 5.7    | 0.208 | 7.08                                               |
| 5.0    | 0.191 | 7.11                                               |
| 4.2    | 0.168 | 7.13                                               |
| 2.1    | 0.099 | 7.26                                               |
| 1.0    | 0.052 | 7.35                                               |

$$K_D = 2.9 \times 10 \text{ M}^{-1}$$

Figure S 40.  $^1\text{H}$  NMR dilution titration of  $4\text{H}_2$ .



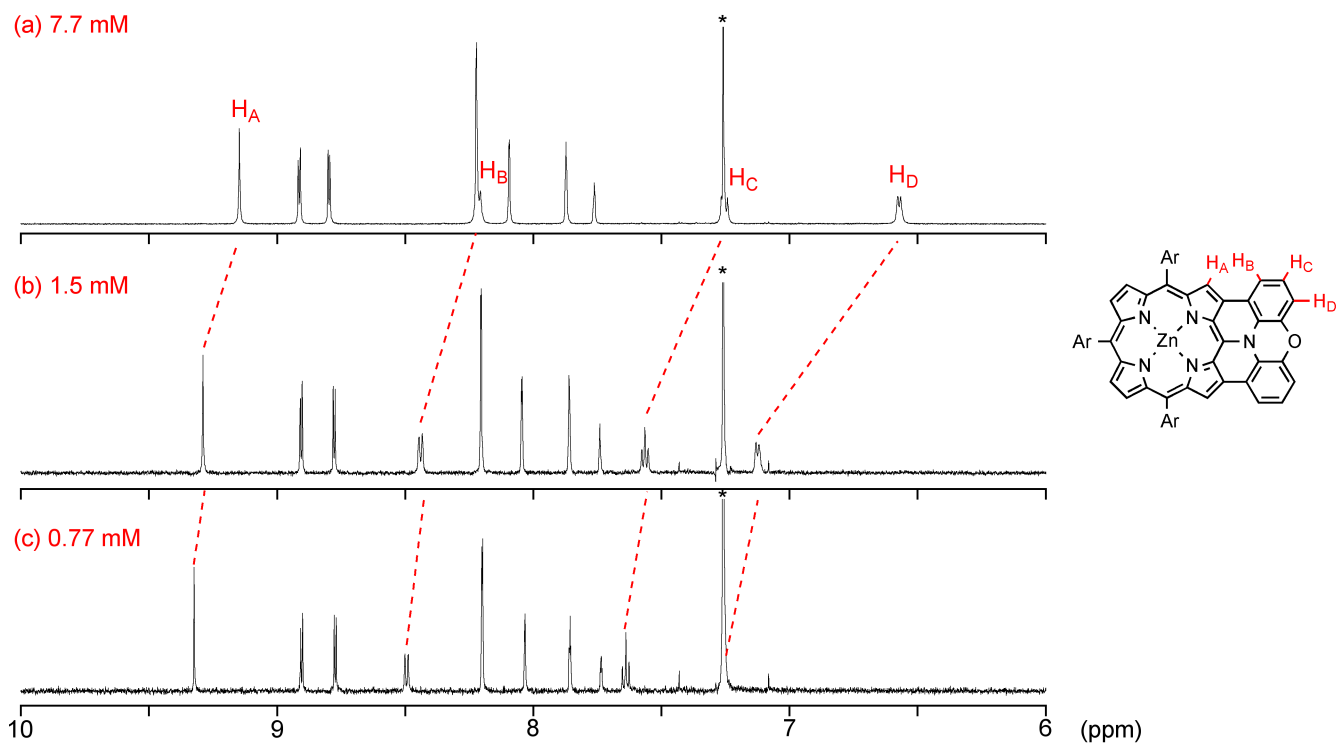

Figure S 41.  $^1\text{H}$  NMR spectra of **4Zn** in  $\text{CDCl}_3$  under different concentrations: (a) 8.3 mM, (b) 6.3 mM, and (c) 2.1 mM at 25  $^\circ\text{C}$ .

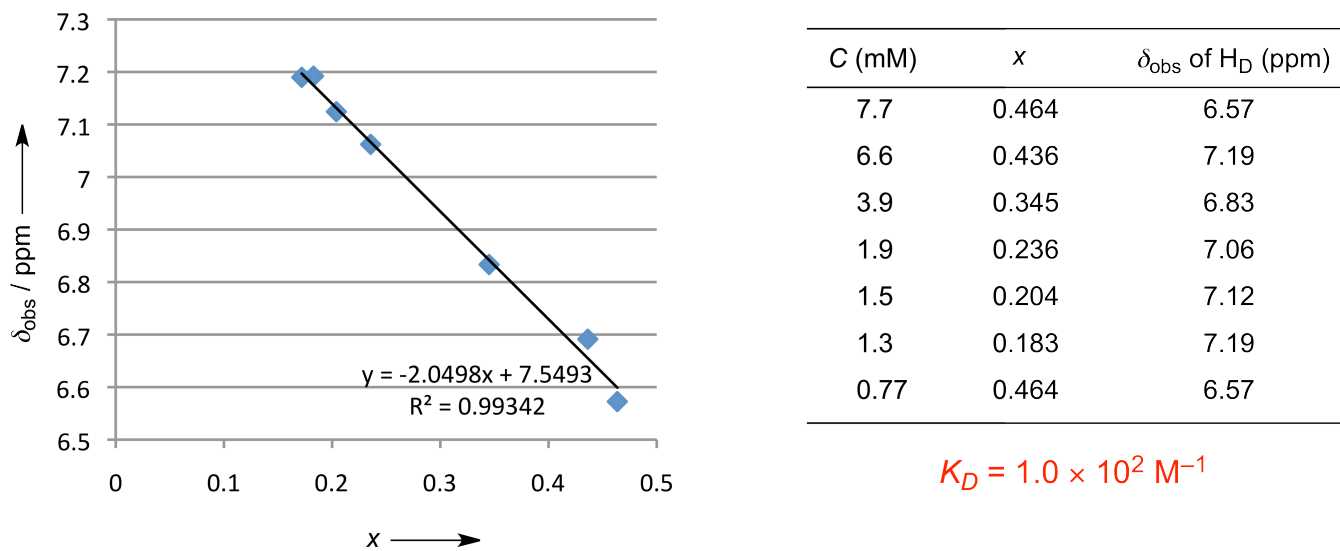

Figure S 42.  $^1\text{H}$  NMR dilution titration of **4Zn**.

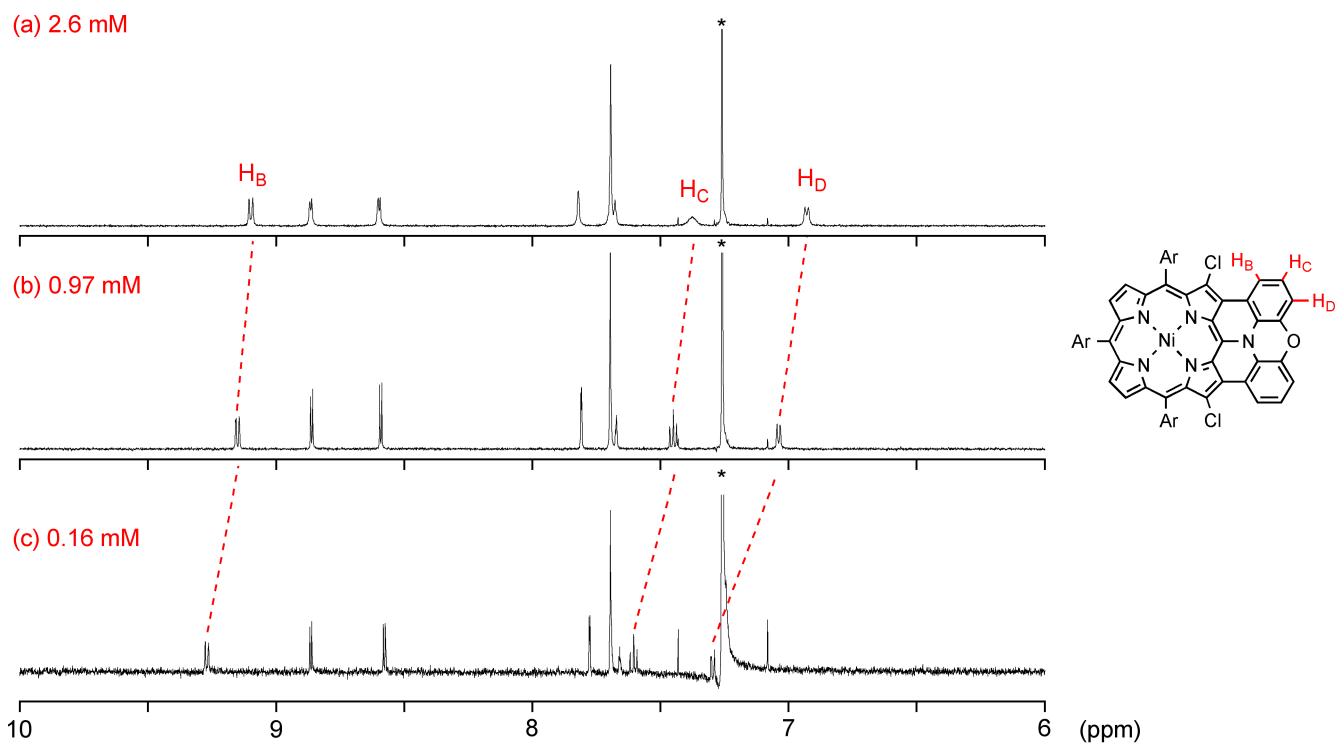

Figure S 43. <sup>1</sup>H NMR spectra of **13** in CDCl<sub>3</sub> under different concentrations: (a) 2.6 mM, (b) 0.97 mM, and (c) 0.16 mM at 25 °C.

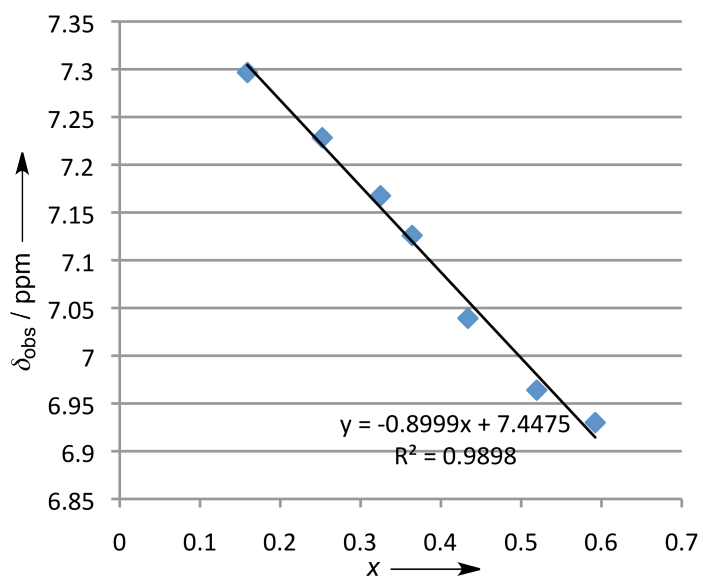

| C (mM) | x     | $\delta_{\text{obs}}$ of H <sub>D</sub> (ppm) |
|--------|-------|-----------------------------------------------|
| 2.6    | 0.592 | 6.93                                          |
| 1.6    | 0.519 | 6.96                                          |
| 0.97   | 0.434 | 7.04                                          |
| 0.65   | 0.364 | 7.13                                          |
| 0.51   | 0.325 | 7.17                                          |
| 0.32   | 0.252 | 7.23                                          |
| 0.16   | 0.159 | 7.30                                          |

$$K_D = 7.0 \times 10^2 \text{ M}^{-1}$$

Figure S 44. <sup>1</sup>H NMR dilution titration of **13**.

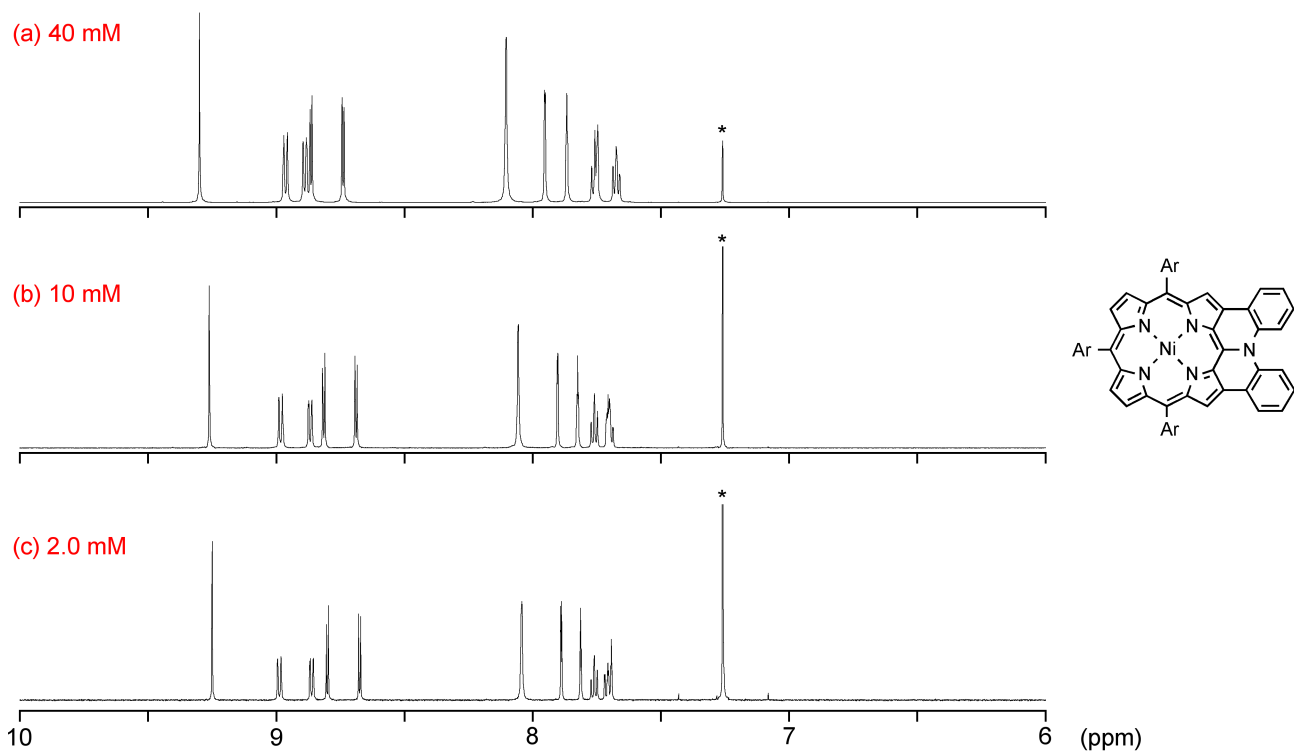

**Figure S 45.**  $^1\text{H}$  NMR spectra of **10Ni** in  $\text{CDCl}_3$  under different concentrations: (a) 40 mM, (b) 10 mM, and (c) 2.0 mM at 25 °C.

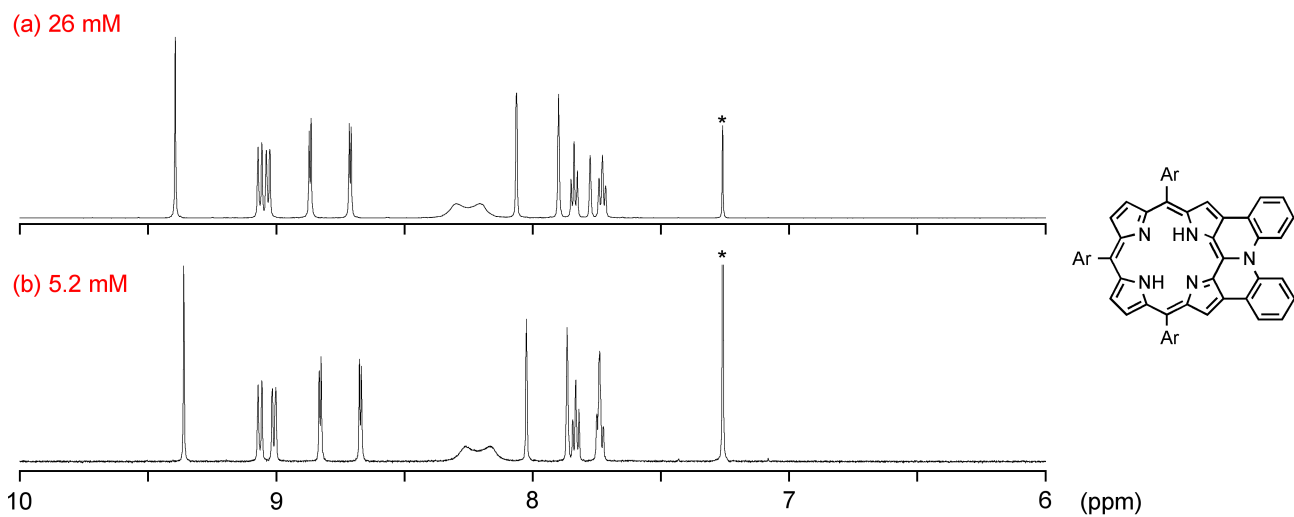

**Figure S 46.**  $^1\text{H}$  NMR spectra of **10H<sub>2</sub>** in  $\text{CDCl}_3$  under different concentrations: (a) 26 mM and (c) 5.2 mM at 25 °C.

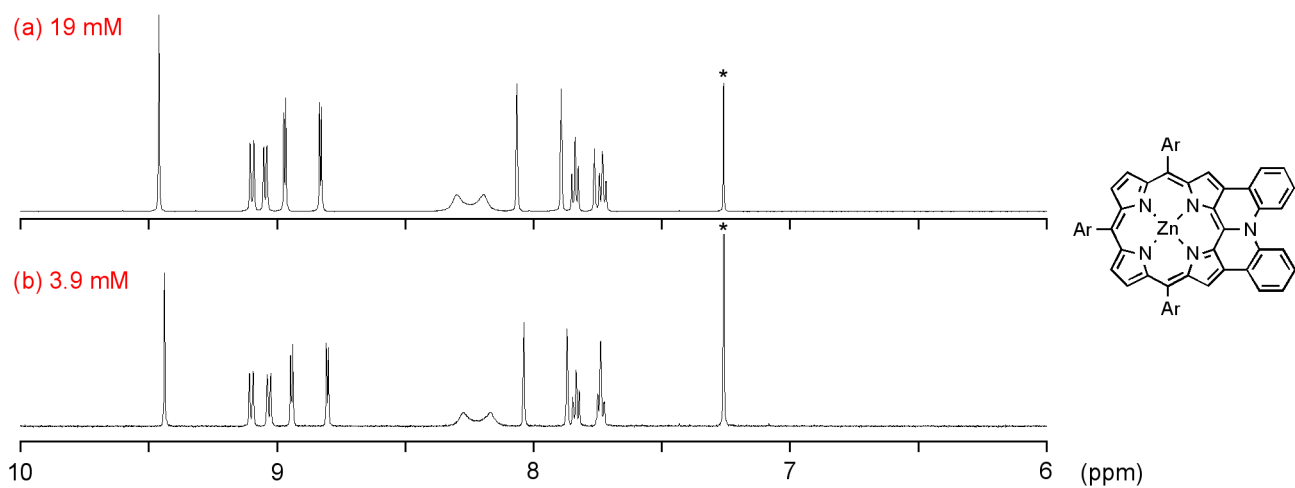

**Figure S 47.**  $^1\text{H}$  NMR spectra of **10Zn** in  $\text{CDCl}_3$  under different concentrations: (a) 19 mM and (c) 3.9 mM at 25  $^\circ\text{C}$ .

## 5. X-Ray Crystal Structures

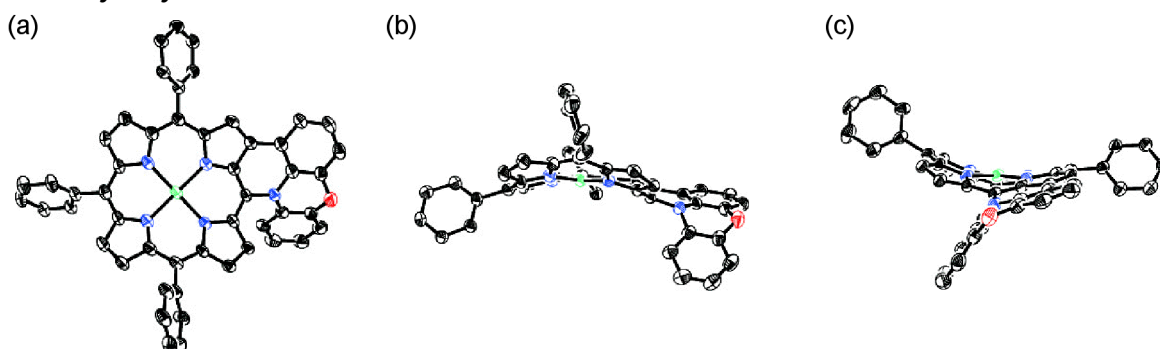

Figure S 48. X-Ray crystal structures of 9. (a) Top view and (b,c) side views. Thermal ellipsoids are shown at the 50% probability level. Solvent molecules, *tert*-butyl groups, and all hydrogen atoms are omitted for clarity.

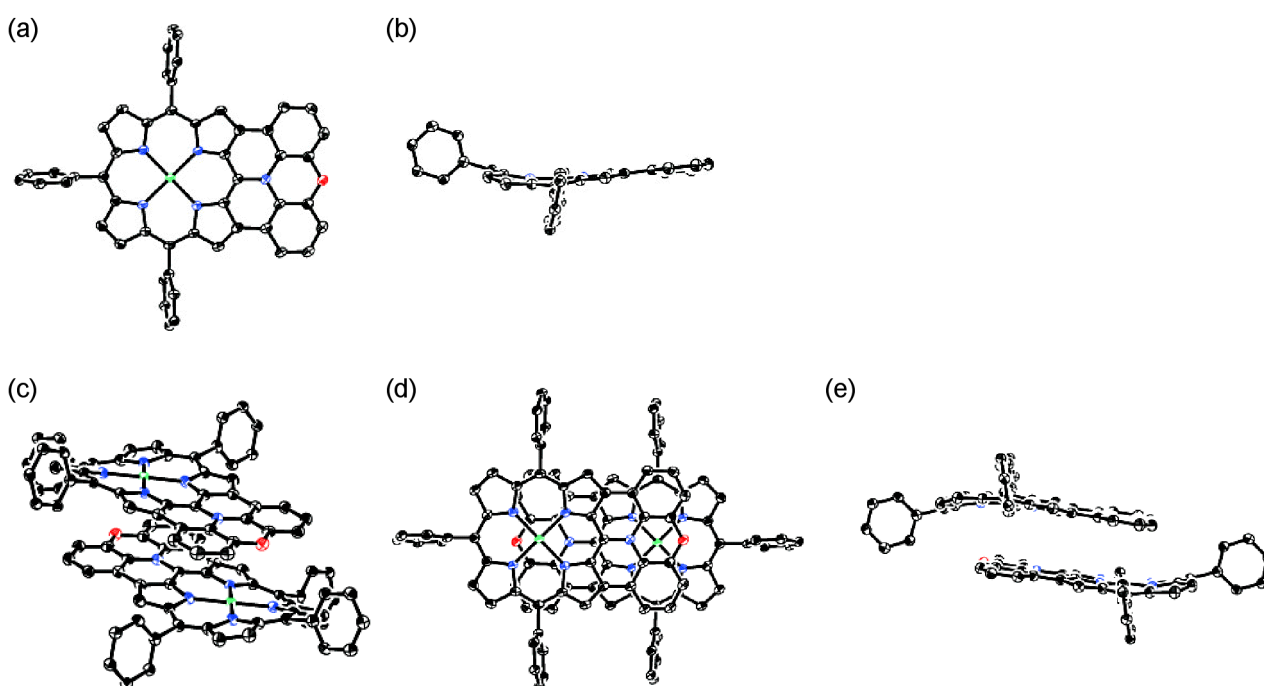

Figure S 49. X-Ray crystal structures of 4Ni. (a) Top view and (b) side view of the single molecule. (c) Over view, (d) top view, and (e) side view of the  $\pi$ -stacked dimer. Thermal ellipsoids are shown at the 50% probability level. Solvent molecules, *tert*-butyl groups, and all hydrogen atoms are omitted for clarity.

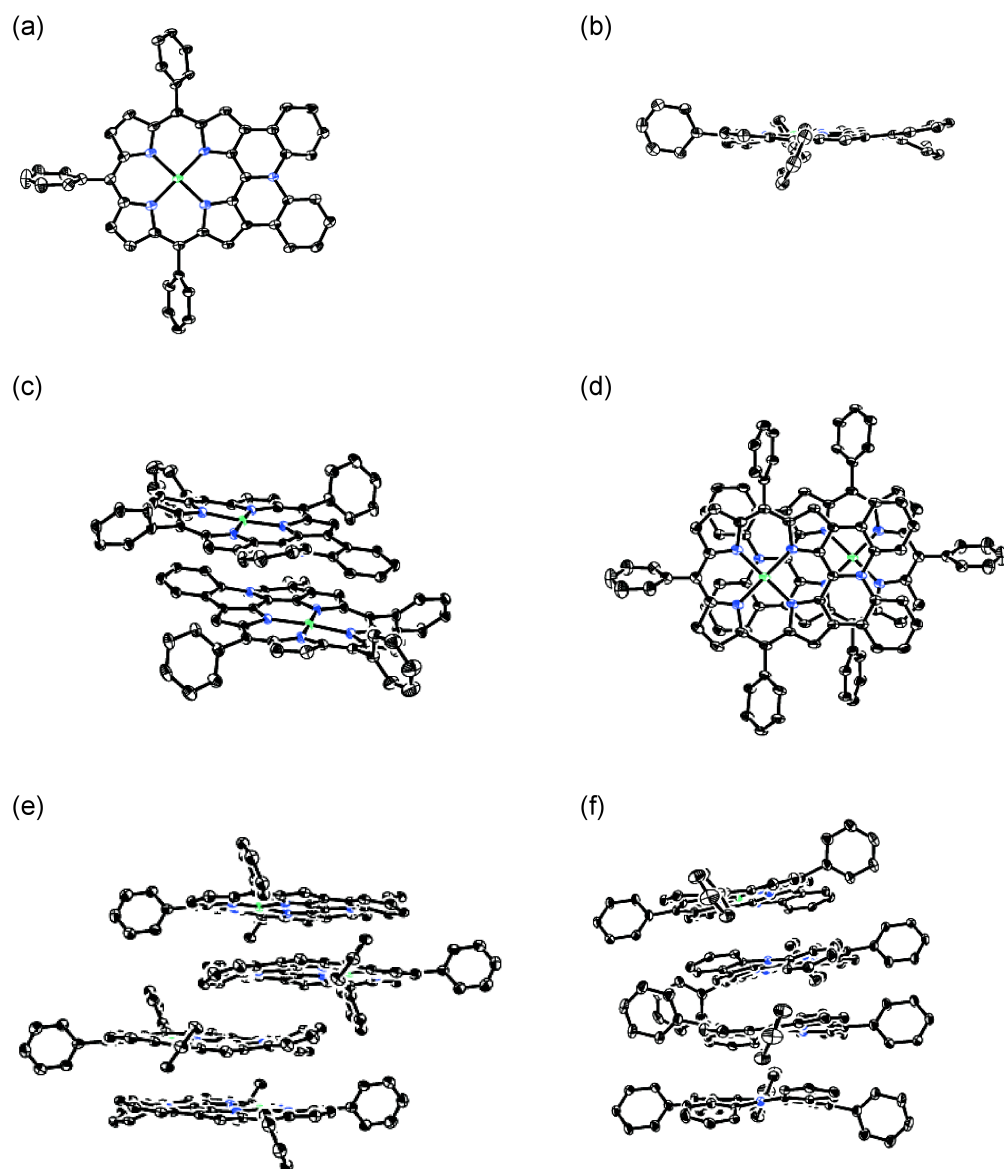

**Figure S 50.** X-Ray crystal structures of 10Ni. (a) Top view and (b) side view of the single molecule. (c) Over view and (d) top view of the  $\pi$ -stacked dimer. (e,f) Side views of the packing structure. Thermal ellipsoids are shown at the 50% probability level. Solvent molecules, *tert*-butyl groups, and all hydrogen atoms are omitted for clarity.

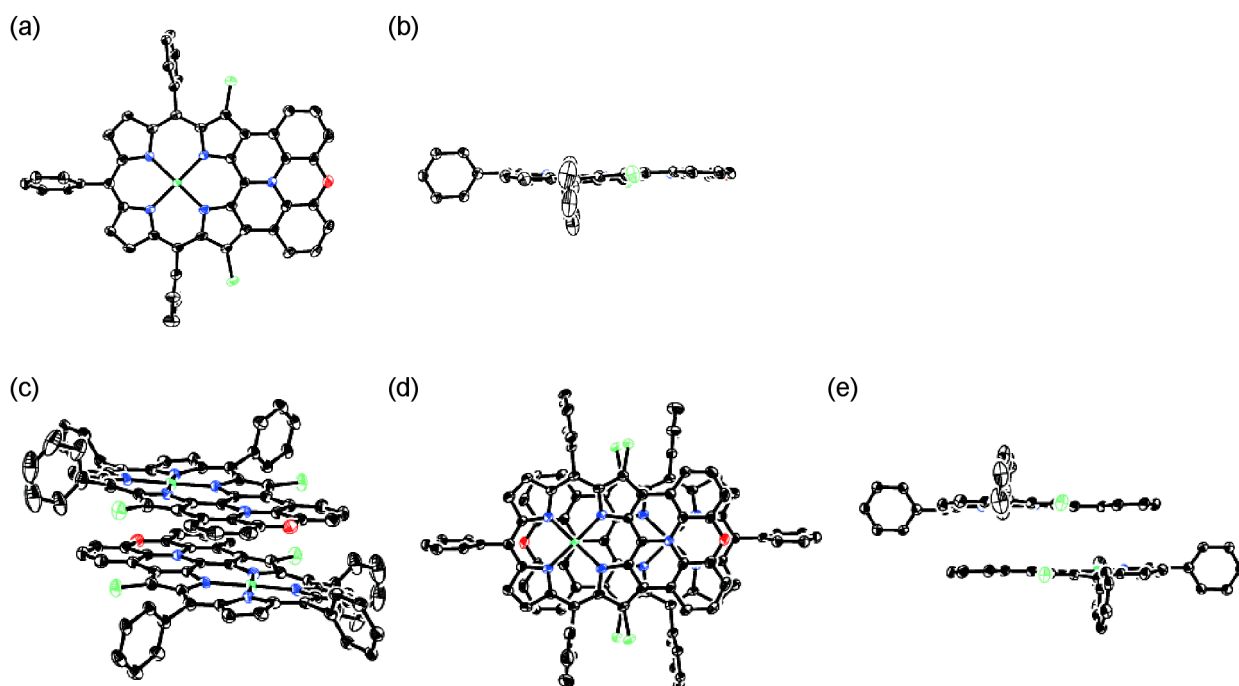

**Figure S 51.** X-Ray crystal structures of **13**. (a) Top view and (b) side view of the single molecule. (c) Over view, (d) top view, and (e) side view of the  $\pi$ -stacked dimer. Thermal ellipsoids are shown at the 50% probability level. Solvent molecules, *tert*-butyl groups, and all hydrogen atoms are omitted for clarity.

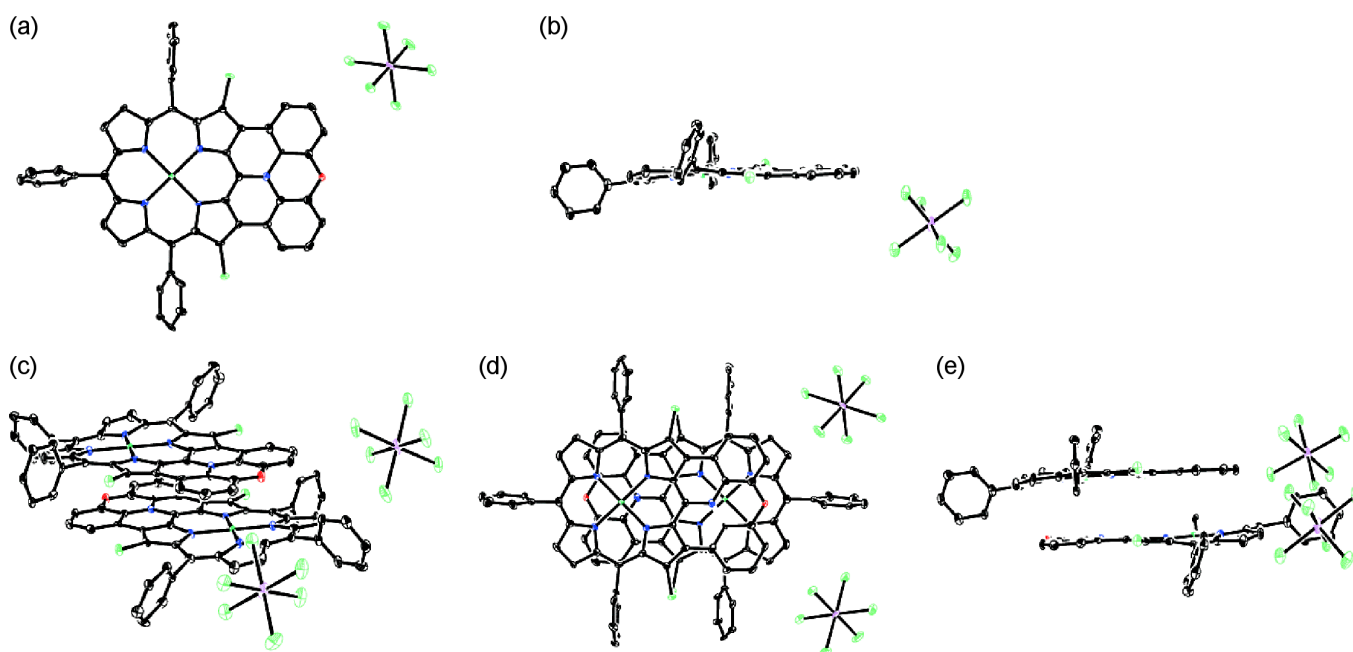

**Figure S 52.** X-Ray crystal structures of **[13]<sup>+</sup>**. (a) Top view and (b) side view of the single molecule. (c) Over view, (d) top view, and (e) side view of the  $\pi$ -stacked dimer. Thermal ellipsoids are shown at the 50% probability level. Solvent molecules, *tert*-butyl groups, and all hydrogen atoms are omitted for clarity.

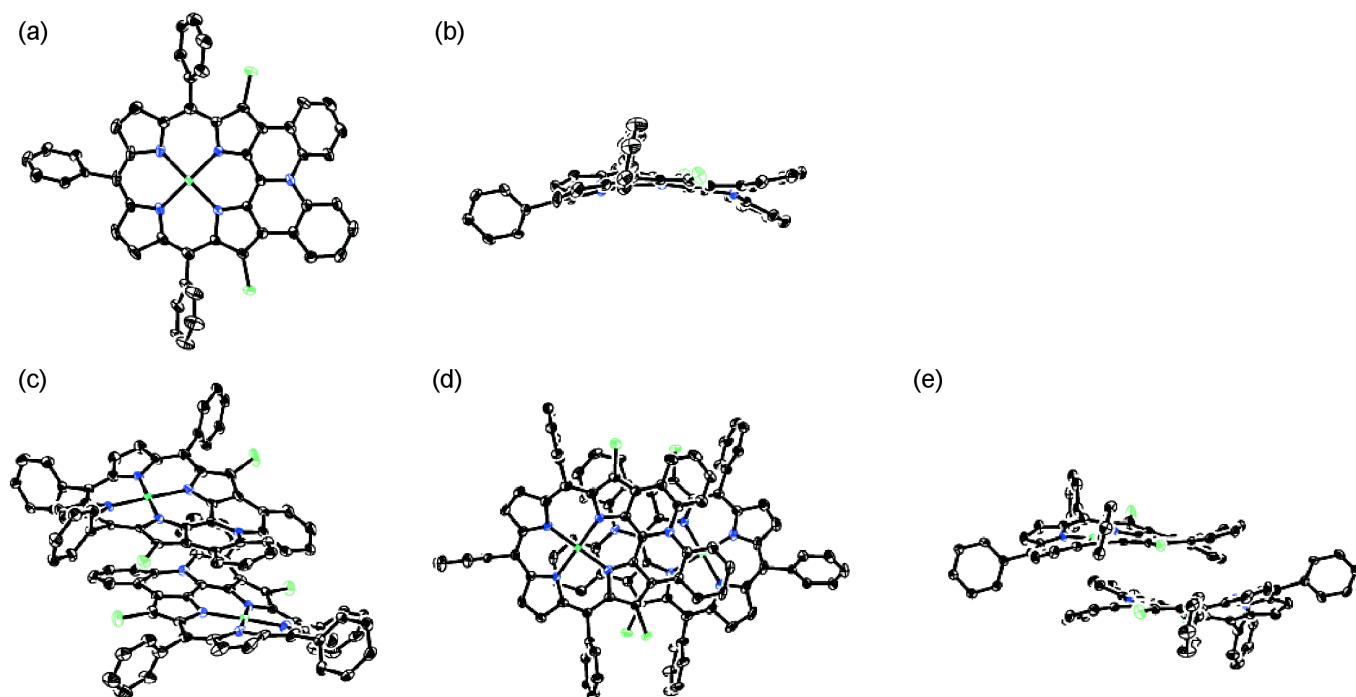

**Figure S 53.** X-Ray crystal structures of **14**. (a) Top view and (b) side view of the single molecule. (c) Over view, (d) top view, and (e) side view of the  $\pi$ -stacked dimer. Thermal ellipsoids are shown at the 50% probability level. Solvent molecules, *tert*-butyl groups, and all hydrogen atoms are omitted for clarity.

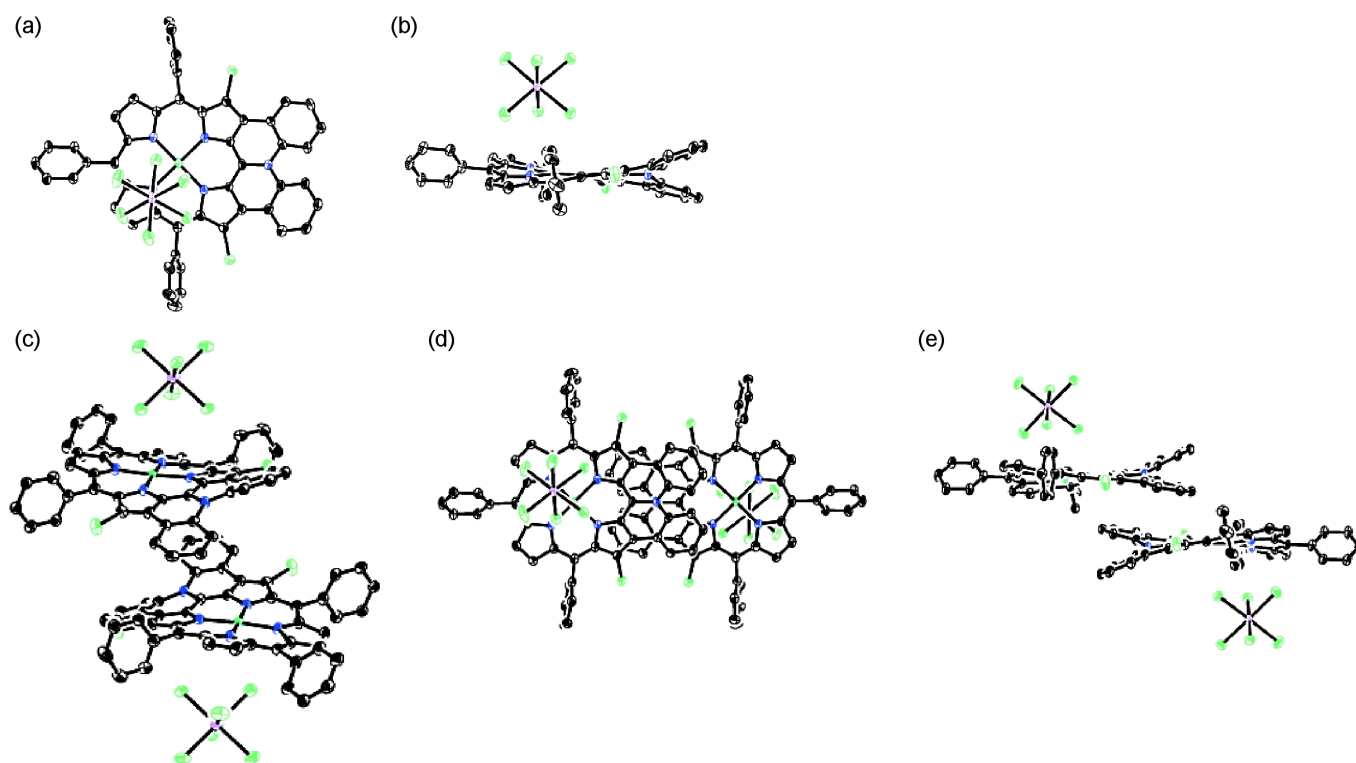

**Figure S 54.** X-Ray crystal structures of **[14]<sup>+</sup>**. (a) Top view and (b) side view of the single molecule. (c) Over view, (d) top view, and (e) side view of the  $\pi$ -stacked dimer. Thermal ellipsoids are shown at the 30% probability level. Solvent molecules, *tert*-butyl groups, and all hydrogen atoms are omitted for clarity.



**Table S 1.** Crystal data and structure refinements for **9**, **4Ni**, and **10Ni**.

| Compound                                            | <b>9</b>                                                                                                                   | <b>4Ni</b>                                                                                                 | <b>10Ni</b>                                                                                  |
|-----------------------------------------------------|----------------------------------------------------------------------------------------------------------------------------|------------------------------------------------------------------------------------------------------------|----------------------------------------------------------------------------------------------|
| Empirical Formula                                   | C <sub>74</sub> H <sub>77</sub> N <sub>5</sub> NiO,<br>0.3(C <sub>2</sub> H <sub>5</sub> OH),<br>0.41 (CHCl <sub>3</sub> ) | C <sub>74</sub> H <sub>75</sub> N <sub>5</sub> NiO,<br>1.5(C <sub>6</sub> H <sub>5</sub> CH <sub>3</sub> ) | C <sub>74</sub> H <sub>77</sub> N <sub>5</sub> Ni,<br>CHCl <sub>3</sub> , CH <sub>3</sub> CN |
| <i>Mw</i>                                           | 1170.47                                                                                                                    | 1243.27                                                                                                    | 1251.30                                                                                      |
| Crystal System                                      | Triclinic                                                                                                                  | Monoclinic                                                                                                 | Monoclinic                                                                                   |
| Space Group                                         | <i>P</i> -1 (No. 2)                                                                                                        | <i>P</i> 2 <sub>1</sub> / <i>n</i> (No. 14)                                                                | <i>C</i> 2/ <i>c</i> (No. 15)                                                                |
| <i>a</i>                                            | 12.375(7) Å                                                                                                                | 21.181(7) Å                                                                                                | 36.653(7) Å                                                                                  |
| <i>b</i>                                            | 16.832(10) Å                                                                                                               | 10.751(4) Å                                                                                                | 21.504(4) Å                                                                                  |
| <i>c</i>                                            | 18.491(10) Å                                                                                                               | 29.482(10) Å                                                                                               | 17.115(3) Å                                                                                  |
| $\alpha$                                            | 110.391(8)°                                                                                                                | —                                                                                                          | —                                                                                            |
| $\beta$                                             | 98.378(15)°                                                                                                                | 100.128(9)°                                                                                                | 98.833(7)°                                                                                   |
| $\gamma$                                            | 106.7253(10)°                                                                                                              | —                                                                                                          | —                                                                                            |
| Volume                                              | 3325(3) Å <sup>3</sup>                                                                                                     | 6609(4) Å <sup>3</sup>                                                                                     | 13330(4) Å <sup>3</sup>                                                                      |
| <i>Z</i>                                            | 2                                                                                                                          | 4                                                                                                          | 8                                                                                            |
| Density (calcd.)                                    | 1.169 g/cm <sup>3</sup>                                                                                                    | 1.250 g/cm <sup>3</sup>                                                                                    | 1.247 g/cm <sup>3</sup>                                                                      |
| Completeness                                        | 0.974                                                                                                                      | 0.992                                                                                                      | 0.990                                                                                        |
| Goodness-of-fit                                     | 1.092                                                                                                                      | 1.029                                                                                                      | 1.047                                                                                        |
| <i>R</i> <sub>1</sub> [ <i>I</i> > 2σ ( <i>I</i> )] | 0.0837                                                                                                                     | 0.0714                                                                                                     | 0.0768                                                                                       |
| <i>wR</i> <sub>2</sub> (all data)                   | 0.2483                                                                                                                     | 0.2075                                                                                                     | 0.2444                                                                                       |
| Solvent System                                      | CHCl <sub>3</sub> /EtOH                                                                                                    | toluene/MeOH                                                                                               | CHCl <sub>3</sub> /MeCN                                                                      |
| CCDC No.                                            | 1469156                                                                                                                    | 1469155                                                                                                    | 1469154                                                                                      |

**Table S 2.** Crystal data and structure refinements for **13**, **[13]<sup>+</sup>**, **[14]** and **[14]<sup>+</sup>**.

| Compound                                          | <b>13</b>                                                                                       | <b>[13]<sup>+</sup></b>                                                                                                                                         | <b>14</b>                                                                                                                                             | <b>[14]<sup>+</sup></b>                                                                                                          |
|---------------------------------------------------|-------------------------------------------------------------------------------------------------|-----------------------------------------------------------------------------------------------------------------------------------------------------------------|-------------------------------------------------------------------------------------------------------------------------------------------------------|----------------------------------------------------------------------------------------------------------------------------------|
| Empirical Formula                                 | 2(C <sub>7</sub> H <sub>7</sub> Cl <sub>2</sub> N <sub>5</sub> NiO),<br>1.5(CHCl <sub>3</sub> ) | C <sub>7</sub> H <sub>7</sub> Cl <sub>2</sub> N <sub>5</sub> NiO,<br>SbCl <sub>6</sub> ,<br>2(C <sub>6</sub> H <sub>14</sub> ), CH <sub>2</sub> Cl <sub>2</sub> | 2(C <sub>7</sub> H <sub>7</sub> Cl <sub>2</sub> N <sub>5</sub> Ni),<br>1.5(CHCl <sub>3</sub> ), C <sub>3</sub> H <sub>7</sub> OH,<br>H <sub>2</sub> O | C <sub>7</sub> H <sub>7</sub> Cl <sub>2</sub> N <sub>5</sub> Ni,<br>SbCl <sub>6</sub> ,<br>0.5(CH <sub>2</sub> Cl <sub>2</sub> ) |
| <i>M<sub>w</sub></i>                              | 2535.01                                                                                         | 1767.68                                                                                                                                                         | 3143.91                                                                                                                                               | 1540.91                                                                                                                          |
| Crystal System                                    | Triclinic                                                                                       | Tetragonal                                                                                                                                                      | Monoclinic                                                                                                                                            | Monoclinic                                                                                                                       |
| Space Group                                       | <i>P</i> -1 (No.2)                                                                              | <i>I</i> <sub>4</sub> / <i>a</i> (No. 88)                                                                                                                       | <i>C</i> 2/ <i>c</i> (No. 15)                                                                                                                         | <i>P</i> 2 <sub>1</sub> / <i>n</i> (No. 14)                                                                                      |
| <i>a</i>                                          | 18.141(3) Å                                                                                     | 57.941(6) Å                                                                                                                                                     | 72.720(9) Å                                                                                                                                           | 27.888(11) Å                                                                                                                     |
| <i>b</i>                                          | 20.0791(19) Å                                                                                   | 57.941(6) Å                                                                                                                                                     | 13.4081(16) Å                                                                                                                                         | 9.758(3) Å                                                                                                                       |
| <i>c</i>                                          | 20.299(2) Å                                                                                     | 10.6631(12) Å                                                                                                                                                   | 33.152(4) Å                                                                                                                                           | 29.846(11) Å                                                                                                                     |
| <i>α</i>                                          | 62.0374(10)°                                                                                    | —                                                                                                                                                               | —                                                                                                                                                     | —                                                                                                                                |
| <i>β</i>                                          | 79.030(16)°                                                                                     | —                                                                                                                                                               | 102.869(4)°                                                                                                                                           | 113.508(6)°                                                                                                                      |
| <i>γ</i>                                          | 87.782(14)°                                                                                     | —                                                                                                                                                               | —                                                                                                                                                     | —                                                                                                                                |
| Volume                                            | 6400.6(14) Å <sup>3</sup>                                                                       | 35798(8)                                                                                                                                                        | 31513(7) Å <sup>3</sup>                                                                                                                               | 7448(5) Å <sup>3</sup>                                                                                                           |
| <i>Z</i>                                          | 2                                                                                               | 16                                                                                                                                                              | 8                                                                                                                                                     | 4                                                                                                                                |
| Density (calcd.)                                  | 1.315 g/cm <sup>3</sup>                                                                         | 1.312 g/cm <sup>3</sup>                                                                                                                                         | 1.325 g/cm <sup>3</sup>                                                                                                                               | 1.374 g/cm <sup>3</sup>                                                                                                          |
| Completeness                                      | 0.970                                                                                           | 0.964                                                                                                                                                           | 0.964                                                                                                                                                 | 0.986                                                                                                                            |
| Goodness-of-fit                                   | 1.045                                                                                           | 1.079                                                                                                                                                           | 1.064                                                                                                                                                 | 1.004                                                                                                                            |
| <i>R<sub>i</sub></i> [ <i>I</i> > 2σ( <i>I</i> )] | 0.0791                                                                                          | 0.0992                                                                                                                                                          | 0.0996                                                                                                                                                | 0.0826                                                                                                                           |
| <i>wR<sub>2</sub></i> (all data)                  | 0.2451                                                                                          | 0.2692                                                                                                                                                          | 0.2800                                                                                                                                                | 0.2363                                                                                                                           |
| Solvent System                                    | CHCl <sub>3</sub> /EtOH                                                                         | CH <sub>2</sub> Cl <sub>2</sub> /hexane                                                                                                                         | CHCl <sub>3</sub> / <i>i</i> PrOH                                                                                                                     | CH <sub>2</sub> Cl <sub>2</sub> /heptane                                                                                         |
| CCDC No.                                          | 1469157                                                                                         | 1469158                                                                                                                                                         | 1469159                                                                                                                                               | 1469160                                                                                                                          |

## 6. Electrochemical Properties

Cyclic voltammograms and differential pulse voltammograms were obtained under the following conditions; solvent:  $\text{CH}_2\text{Cl}_2$ , electrolyte: 0.1 M  $n\text{Bu}_4\text{NPF}_6$ , working electrode: glassy carbon, counter electrode: Pt, reference electrode:  $\text{Ag}/\text{AgClO}_4$ , scan rate: 0.05 V/s ( $E > 0.27$  V) and 0.50 V/s ( $E < 0.27$  V).

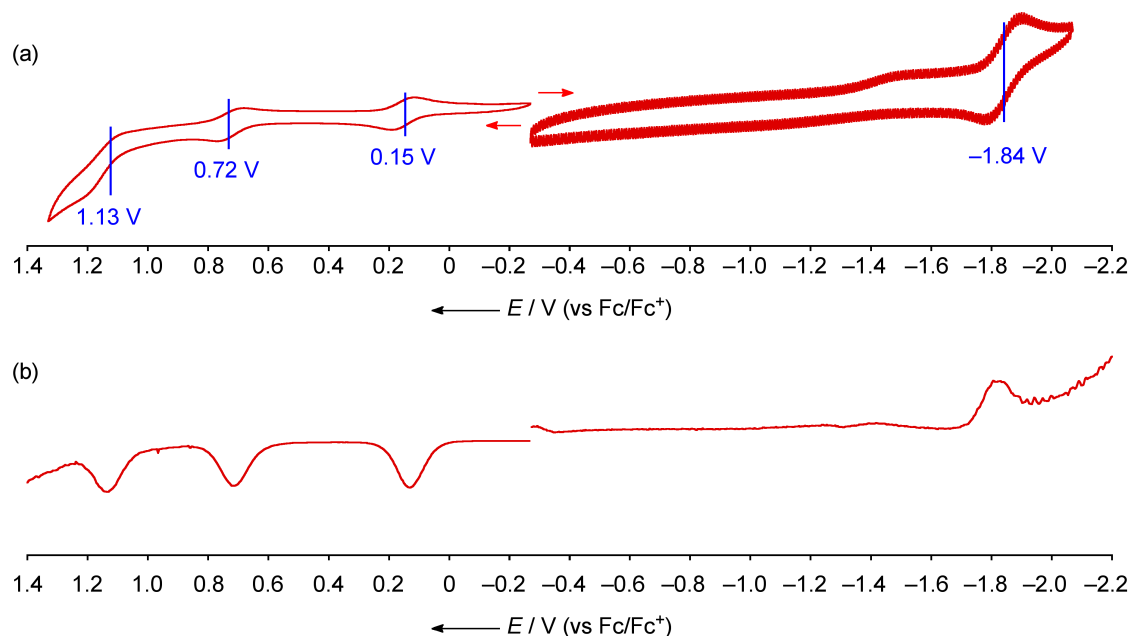

Figure S 55. (a) Cyclic voltammograms and (b) differential pulse voltammograms of 10Ni.

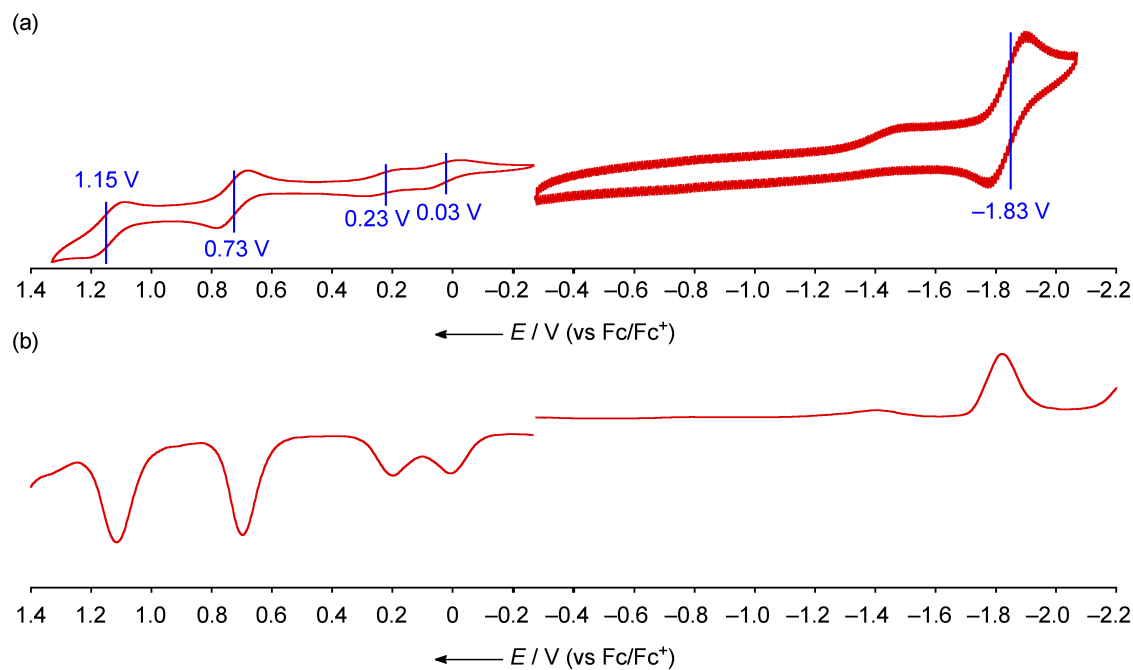

Figure S 56. (a) Cyclic voltammograms and (b) differential pulse voltammograms of 4Ni at 2.2 mM.

## 7. ESR Spectra

ESR spectra for the toluene solution samples of **[13]<sup>+</sup>** and **[14]<sup>+</sup>** were measured by using JEOL JES-FA200 spectrometer at room temperature. Samples of **[13]<sup>+</sup>** and **[14]<sup>+</sup>** (0.049 and 0.047 mM in toluene, respectively) were degassed by freeze-pump-thaw cycles in quartz tube and sealed by frame. The observed ESR signals for were reproduced by a single gaussian signal without hyperfine structure of  $g = 2.0031$  and  $2.0029$ , respectively.

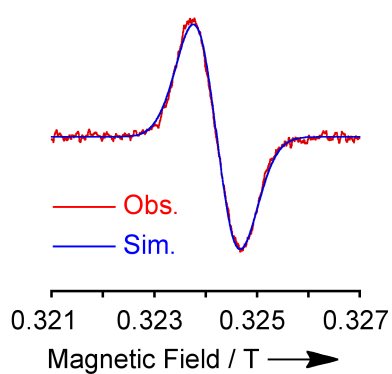

*Figure S 57.* Observed ESR spectrum of **[13]<sup>+</sup>** (0.049 mM in toluene) at room temperature ( $g = 2.0031$ ).

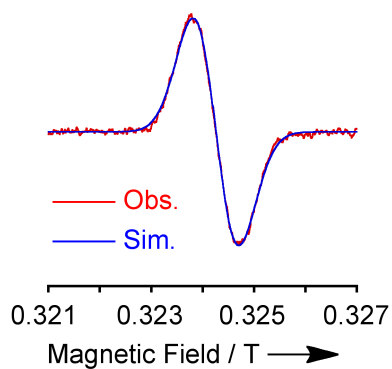

*Figure S 58.* Observed ESR spectrum of **[14]<sup>+</sup>** (0.047 mM in toluene) at room temperature ( $g = 2.0029$ ).

## 8. Temperature Dependent Magnetic Susceptibility

Magnetic susceptibility was measured for the powder sample of [13]<sup>+</sup> and [14]<sup>+</sup> with the temperature range from 2 to 350 K at 0.5 T magnetic field by a Quantum Design MPMS-2S instrument.

The simulated  $\chi T$  values of [13]<sup>+</sup> were obtained by Bleaney–Bowers singlet-triplet model (Eq. 8) with fitted parameters of  $f_1 = 0.50$ ,  $f_2 = 0.15$ , and  $J_1/k_B = -30.4$  K.

$$\chi T = f_1 \frac{N_A g^2 \mu_B^2}{k_B [3 + \exp(-2J_1/k_B T)]} + f_2 \frac{N_A g^2 \mu_B^2}{2k_B} \quad (8)$$

The simulated  $\chi T$  values of [14]<sup>+</sup> were obtained by Bonner–Fisher model (Eq. 9, 10) with fitted parameters of  $f = 0.94$  and  $J_1/k_B = -1.6$  K.

$$\chi T = f \frac{N g^2 \mu_B^2}{k_B} \frac{0.25 + 0.14995x + 0.30094x^2}{1 + 1.9862x + 0.68854x^2 + 6.0626x^3} \quad (9)$$

$$x = \frac{|J_1|}{k_B T} \quad (10)$$

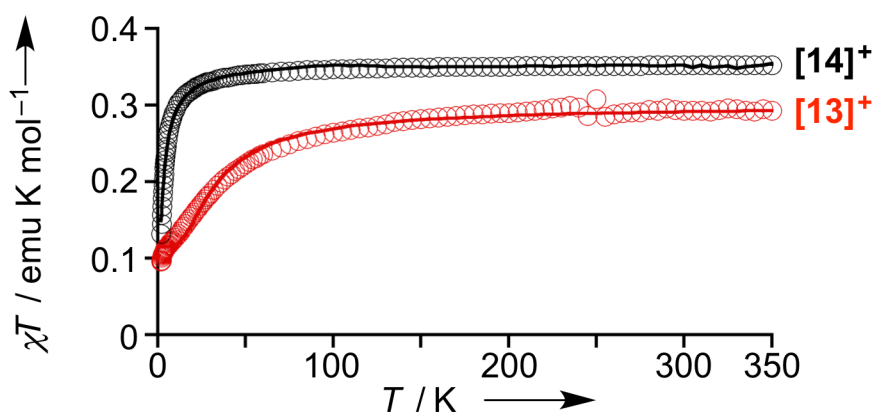

Figure S 59. Temperature dependent magnetic susceptibility of [13]<sup>+</sup> (red) and [14]<sup>+</sup> (black) by SQUID measurement. Circles: observed  $\chi T$  value. Solid line: simulated.

## 9. DFT Calculations

All calculations were carried out using the *Gaussian 09* program.<sup>[S3]</sup> The geometry was obtained from X-ray structures. The calculations of **4Ni** and **7** were performed by the density functional theory (DFT) method with restricted B3LYP (Becke's three-parameter hybrid exchange functionals and the Lee-Yang-Parr correlation functional)<sup>[S4]</sup> level, employing basis sets 6-31G(d) for C, H, O, and N and LANL2DZ for Ni. The calculation of **[6Ni]<sup>+</sup>** and **[13]<sup>+</sup>** was performed by DFT method with unrestricted B3LYP level, employing basis sets 6-31G(d) for C, H, O, N, and Cl and LANL2DZ for Ni. *tert*-Butyl groups were replaced with hydrogen atoms to simplify the calculation.

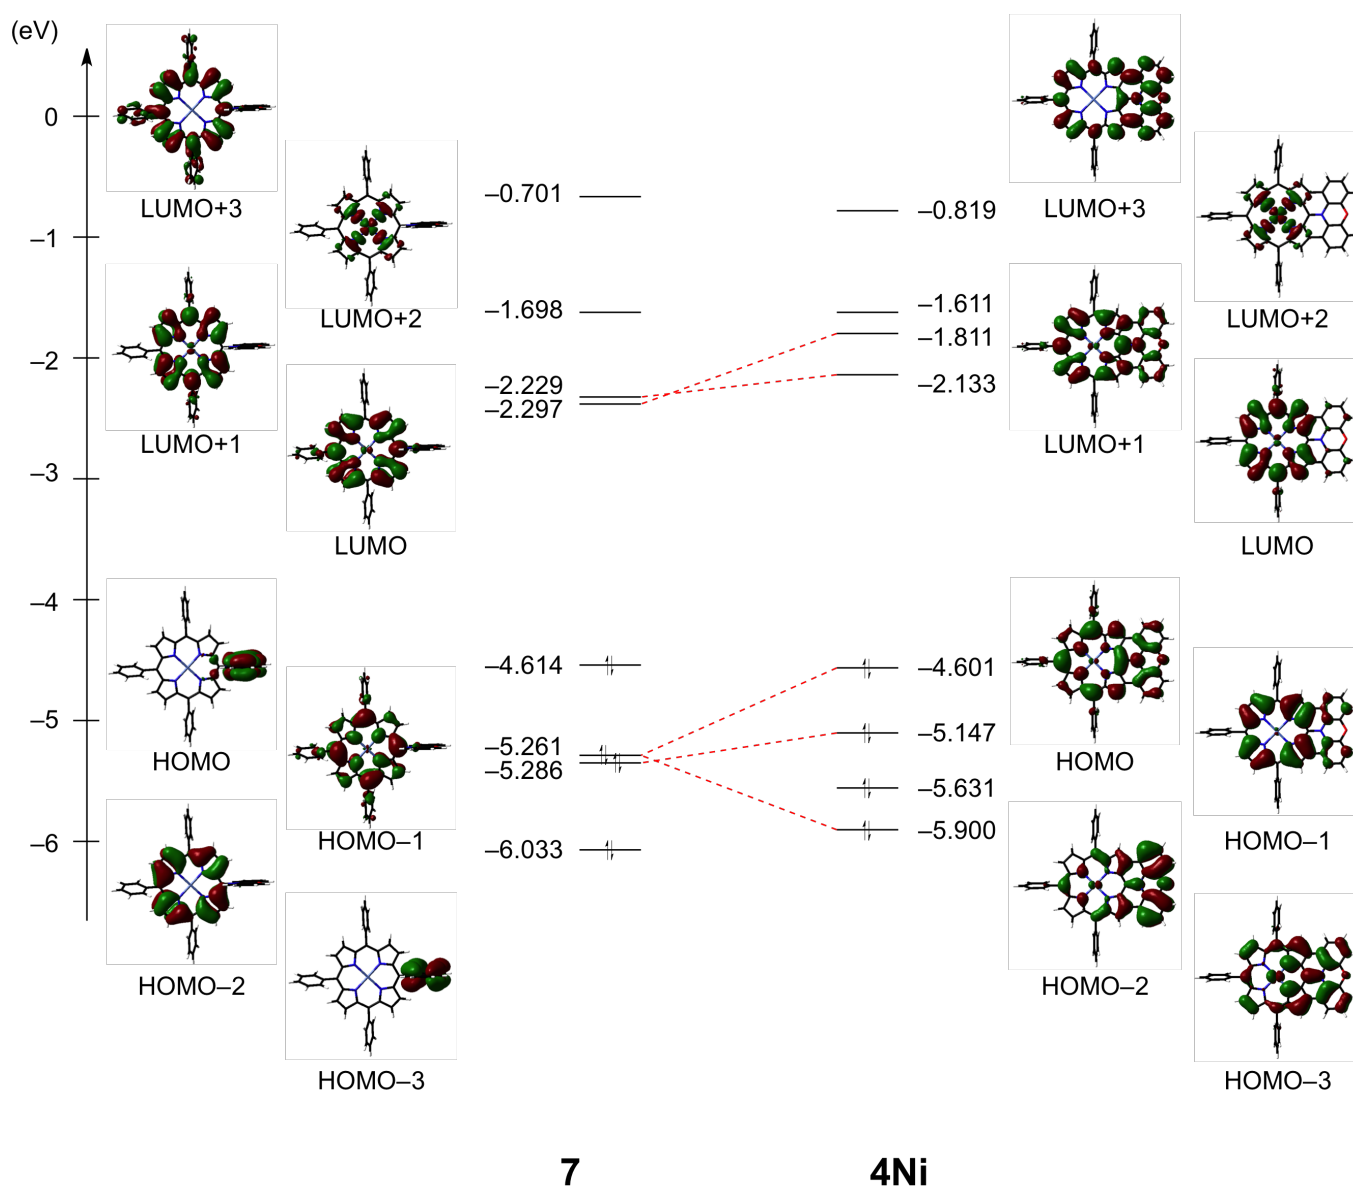

Figure S 60. Energy diagrams and Kohn-Sham orbital representations of **4Ni** and **7**.

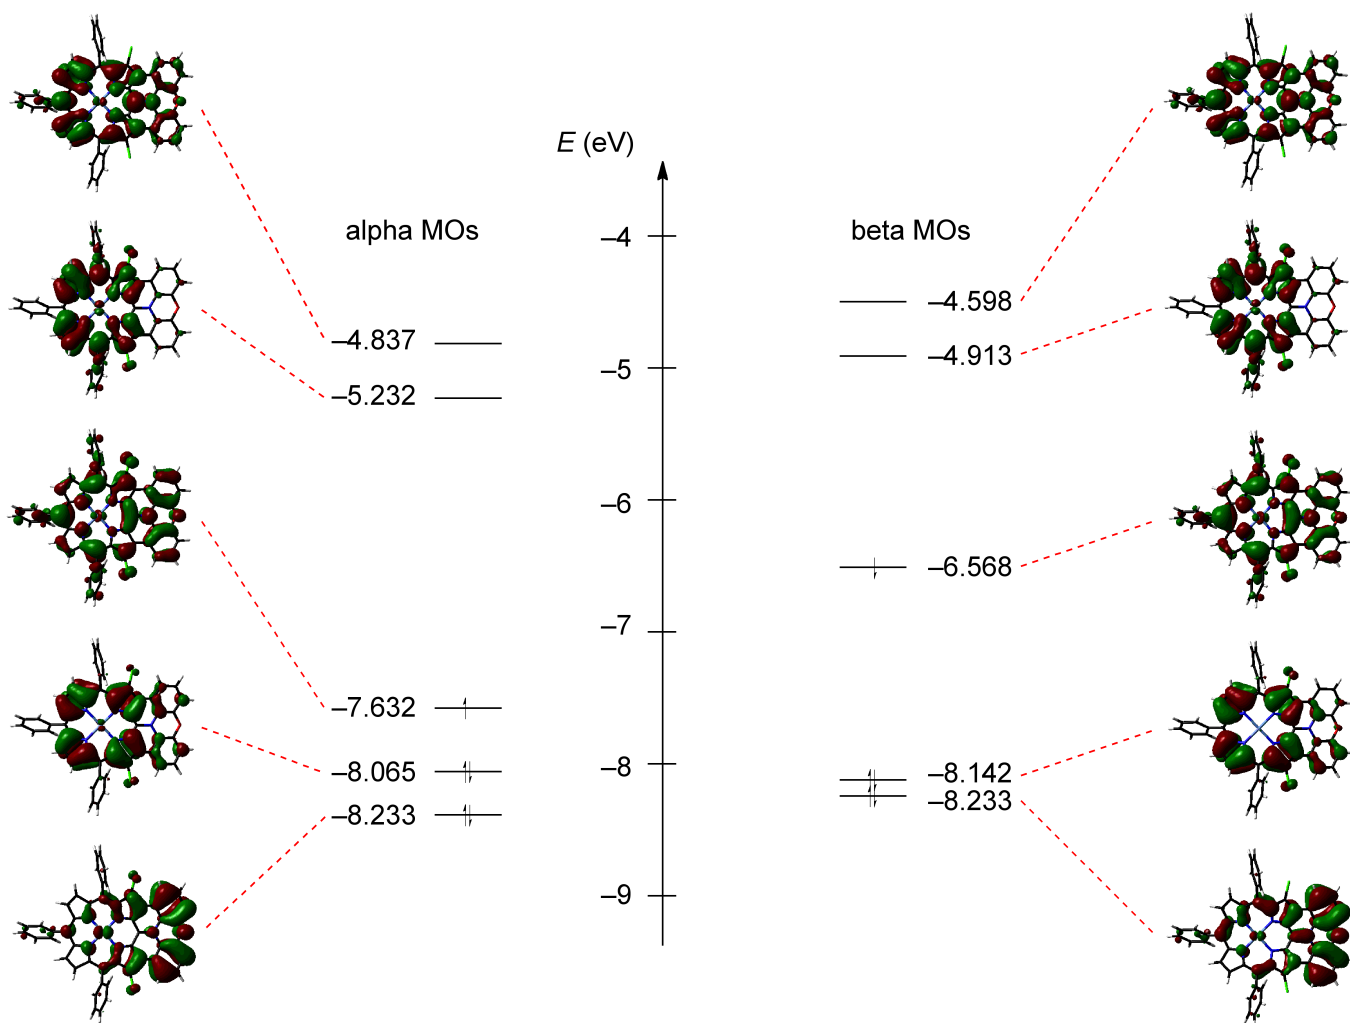

Figure S 61. Energy diagrams and Kohn-Sham orbital representations of  $[13]^+$ .

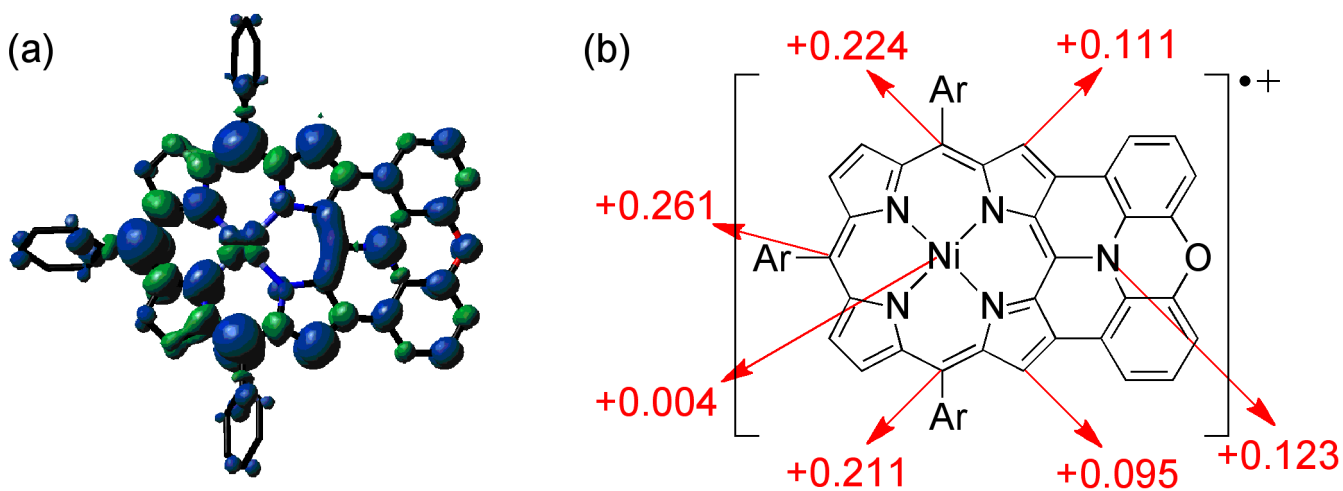

Figure S 62. (a) Spin density distribution and (b) selected values of  $[4Ni]^+$  (isovalue: 0.001; the molecular geometry was optimized based on the X-ray crystal structure of  $[13]^+$ ).

## 10. Fluorescence Decay and Time-resolved TA Spectra

The time-correlated single-photon-counting (TCSPC) system was used for fluorescence decay profiles.<sup>[S5]</sup> The transient absorption spectra were obtained by using home-made femtosecond time-resolved transient absorption (fs-TA) spectrometer. The spectrometer consists of an optical parametric amplifier (OPA; Palitra, Quantronix) pumped by a Ti:sapphire regenerative amplifier system (Integra-C, Quantronix) operating at 1 kHz repetition rate and an optical detection system.<sup>[S5]</sup>

**Table S 3.** Radiative and non-radiative rate constants of **10H<sub>2</sub>**, **10Zn**, **4H<sub>2</sub>**, and **4Zn**.

| Compound                                           | <b>10H<sub>2</sub></b> | <b>10Zn</b>       | <b>4H<sub>2</sub></b> | <b>4Zn</b>        |
|----------------------------------------------------|------------------------|-------------------|-----------------------|-------------------|
| Radiative decay rate ( $k_r$ ) [ $s^{-1}$ ]        | $3.5 \times 10^7$      | $5.2 \times 10^7$ | $4.7 \times 10^7$     | $5.9 \times 10^7$ |
| Non-radiative decay rate ( $k_{nr}$ ) [ $s^{-1}$ ] | $1.7 \times 10^8$      | $3.5 \times 10^8$ | $1.3 \times 10^8$     | $3.1 \times 10^8$ |

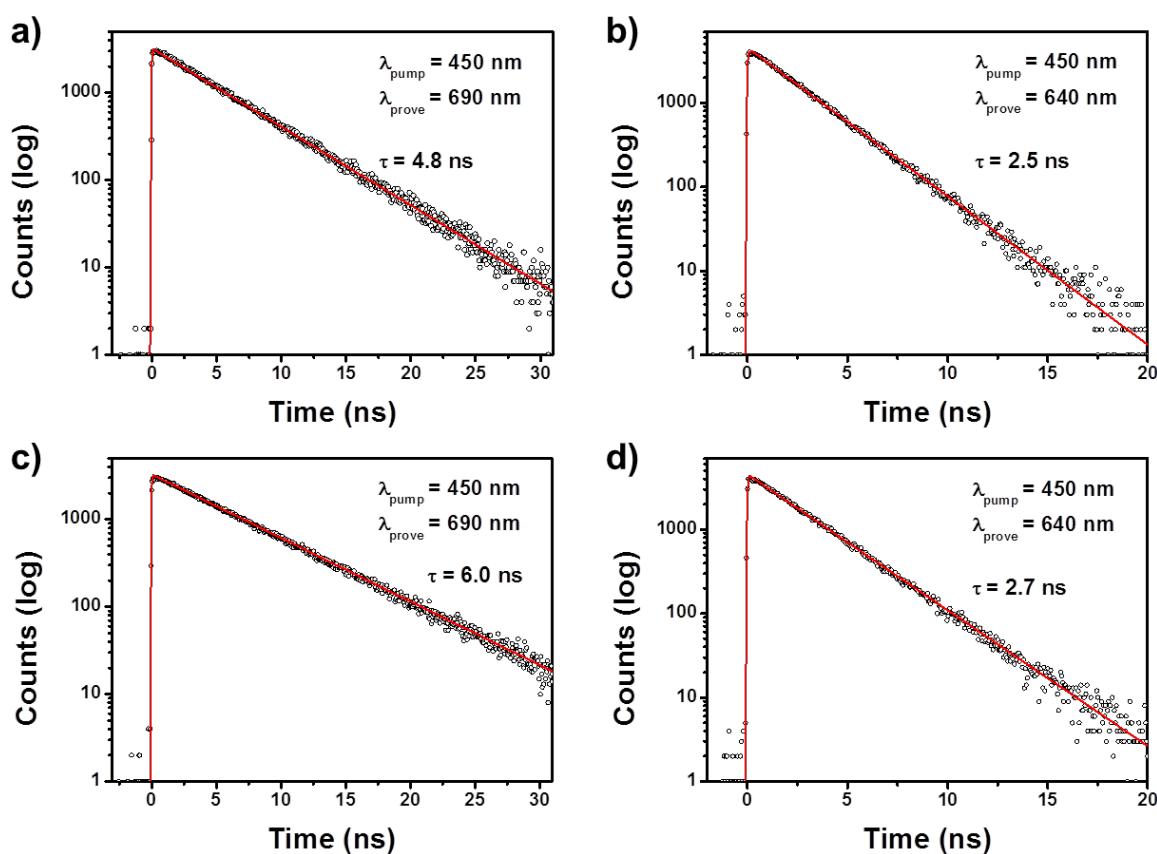

**Figure S 63.** Time-correlated single photon counting (TCSPC) decay curves of a) **10H<sub>2</sub>**, b) **10Zn**, c) **4H<sub>2</sub>**, and d) **4Zn**.



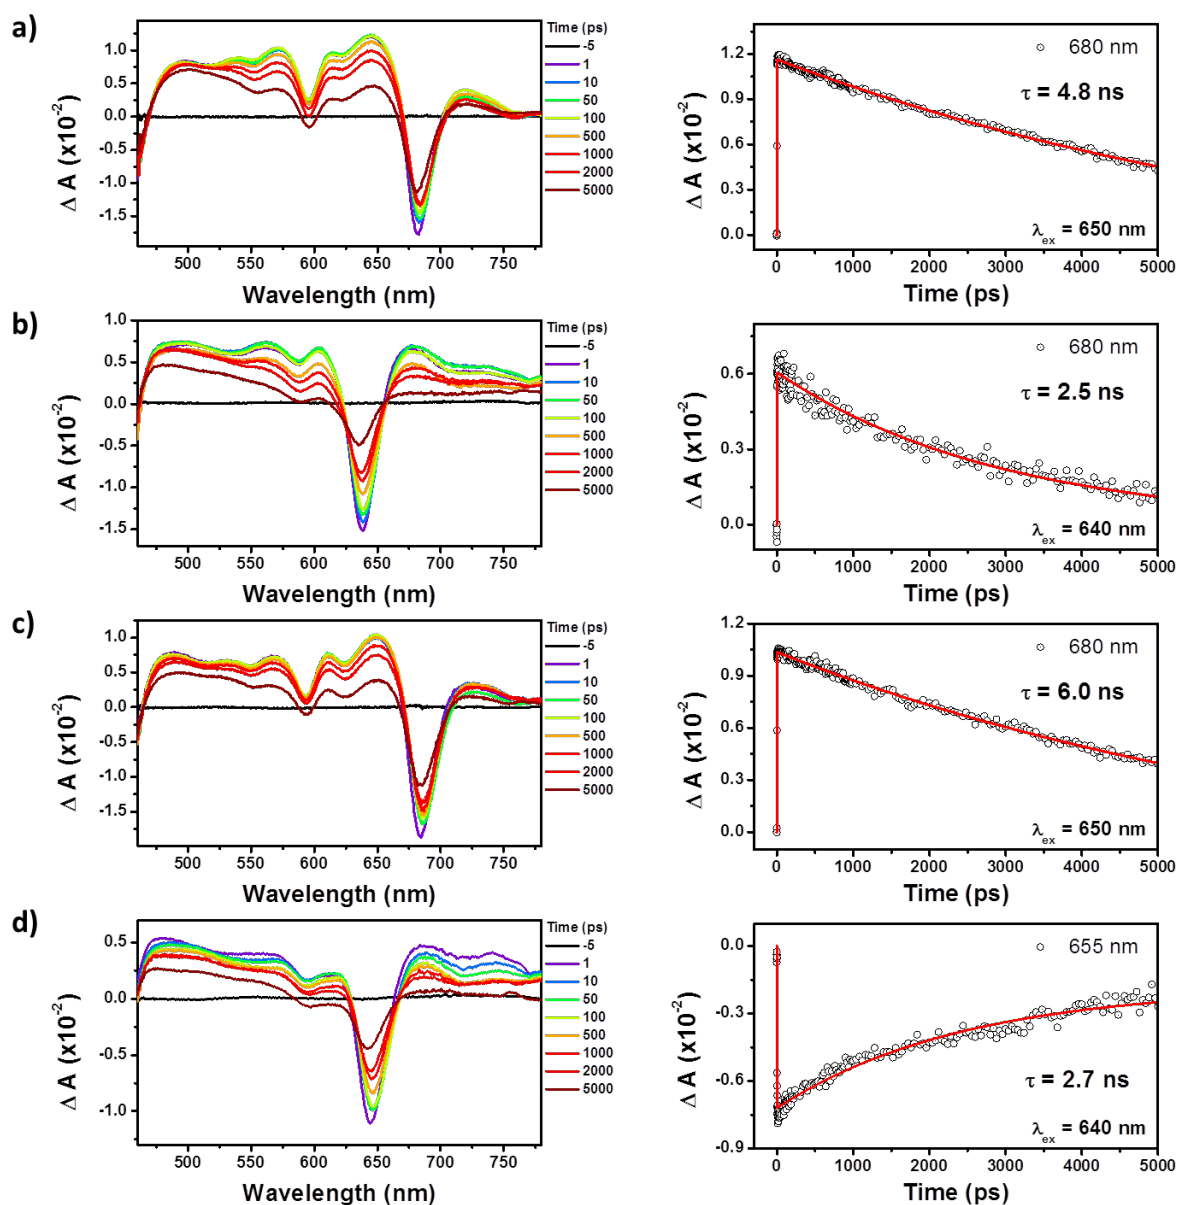

Figure S 64. TA spectra (left) and decay profiles (right) of a) 10H<sub>2</sub>, b) 10Zn, c) 4H<sub>2</sub>, and d) 4Zn in CH<sub>2</sub>Cl<sub>2</sub> with photoexcitation at 685 nm for 4H<sub>2</sub> and 10H<sub>2</sub>, and 649 nm for 4Zn and 10Zn.

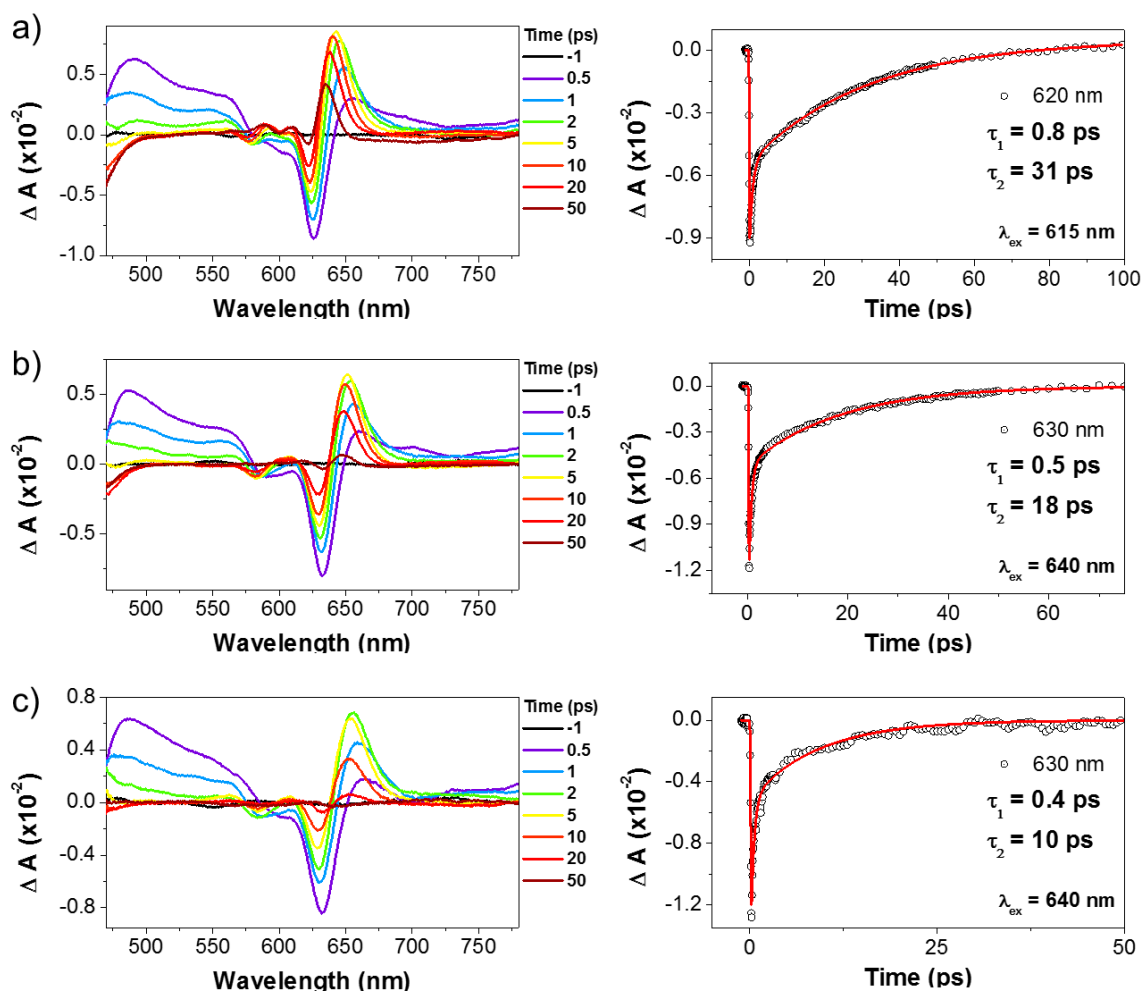

Figure S 65. TA spectra (left) and decay profiles (right) of 13 in a) methyl cyclohexane, b) toluene, and c)  $\text{CH}_2\text{Cl}_2$  with photoexcitation at 615, 640, and 640 nm, respectively.

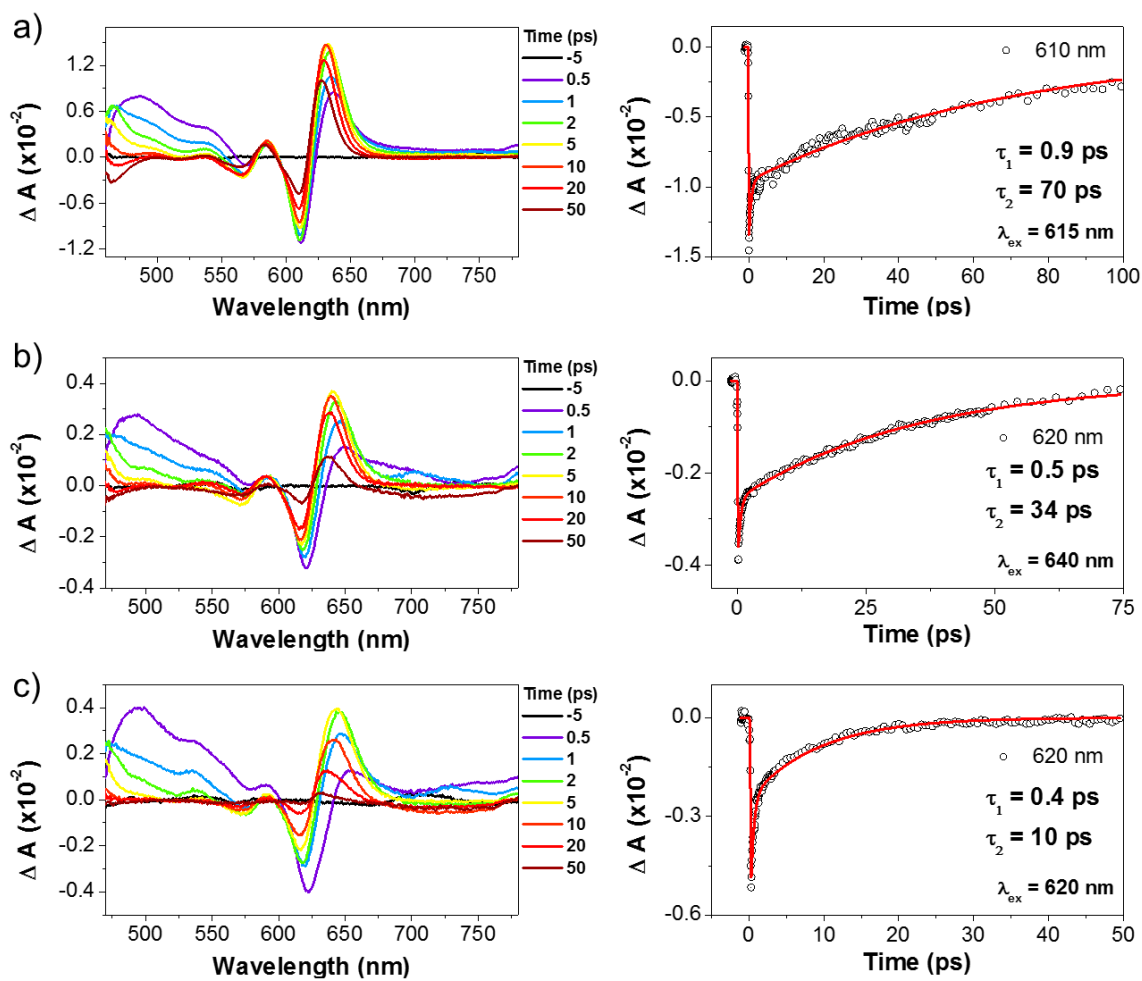

Figure S 66. TA spectra (left) and decay profiles (right) of **14** in a) methyl cyclohexane, b) toluene, and c)  $\text{CH}_2\text{Cl}_2$  with photoexcitation at 615, 640, and 620 nm, respectively.

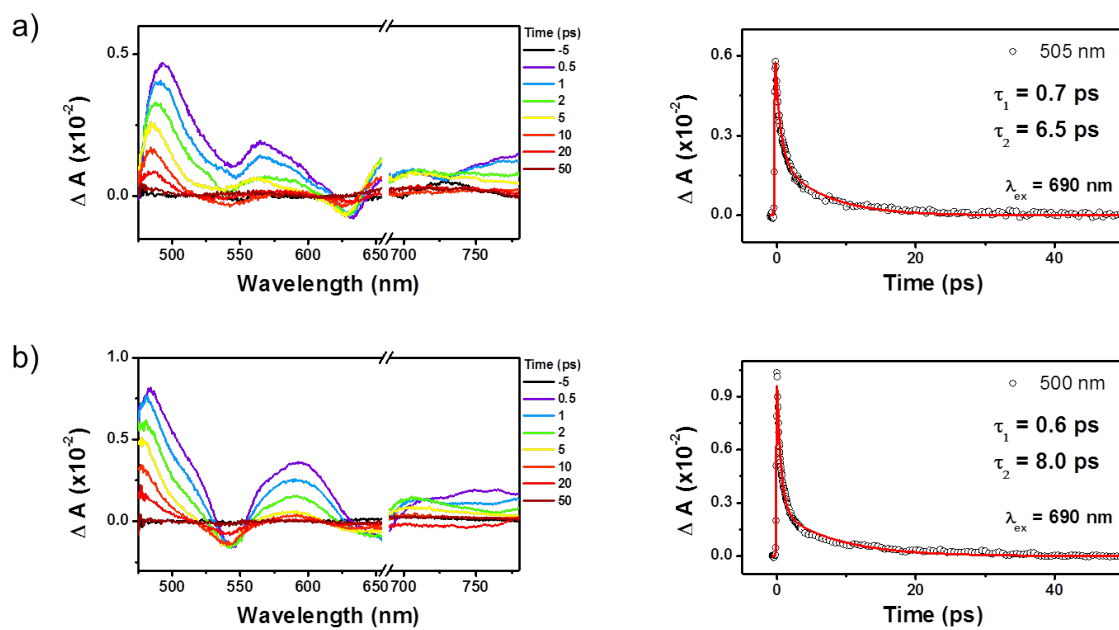

Figure S 67. TA spectra (left) and decay profiles (right) of a) [13]<sup>+</sup> and b) [14]<sup>+</sup> in toluene with photoexcitation at 690 nm.

## 11. Z-Scan Curves in TPA Measurements

The two-photon absorption (TPA) cross-section were measured using the open-aperture Z-scan method with 130 fs pulses from an optical parametric amplifier (Light Conversion, TOPAS) operating at a 2 kHz repetition rate using a Ti:sapphire regenerative amplifier system (Spectra-Physics, Hurricane).<sup>[S6]</sup>

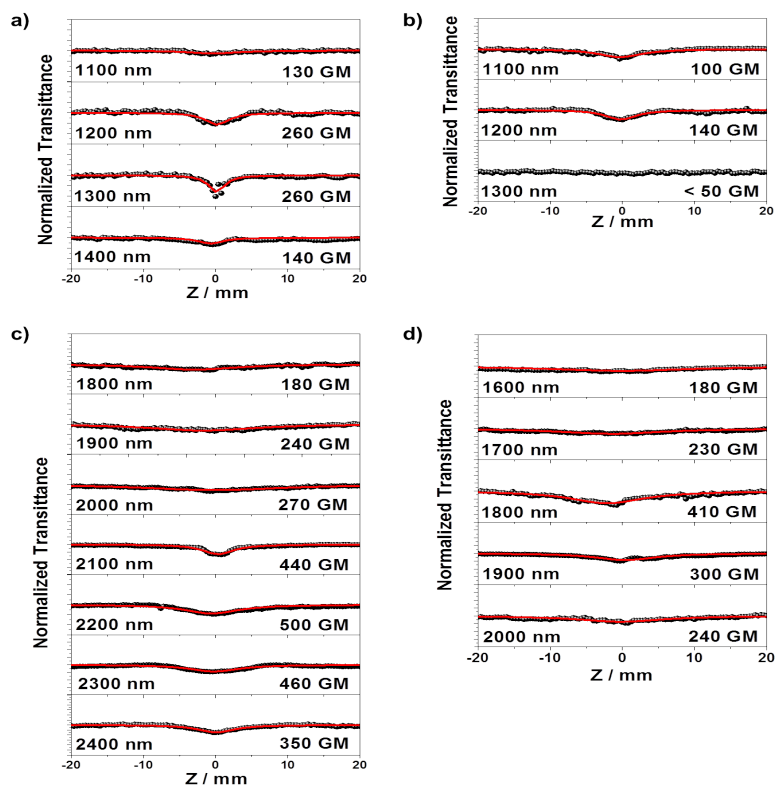

Figure S 68. Z-scan curves of a) 13, b) 14, c) [13]<sup>+</sup>, and d) [14]<sup>+</sup> in toluene.

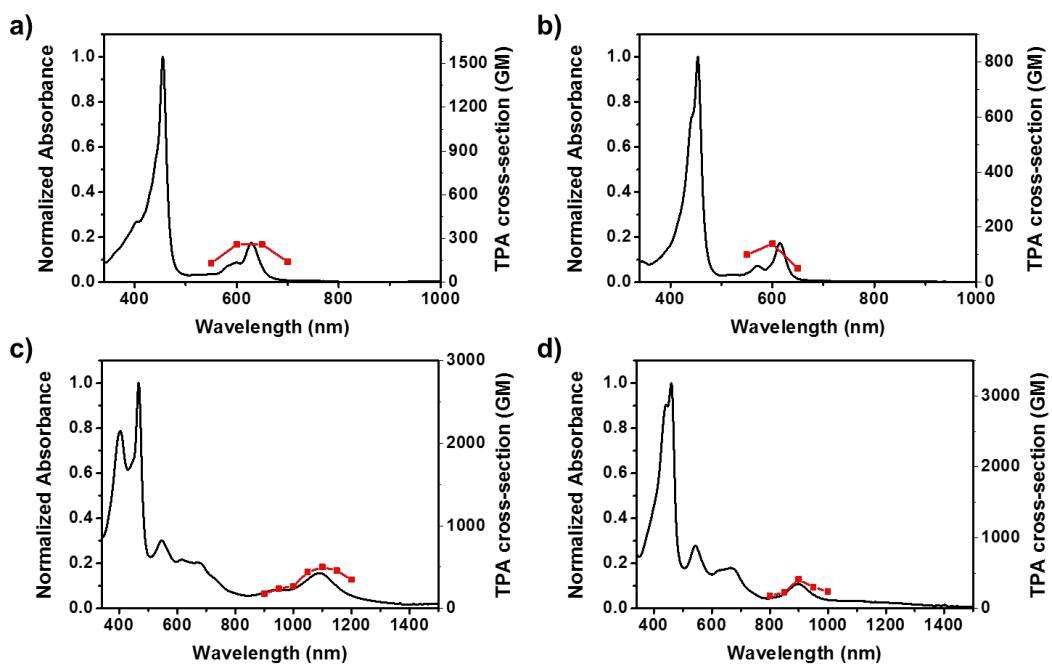

Figure S 69. One photon absorption (black solid line and left vertical axis) and two photon absorption (red line connecting red square symbols and right vertical axis) of a) 13, b) 14, c) [13]<sup>+</sup>, and d) [14]<sup>+</sup>

## **12. References**

- [S1] SHELXL-97 program for refinement of crystal structures from diffraction data, University of Goettingen, Goettingen (Germany); G. Sheldrick, T. Schneider, *Methods Enzymol.* **1997**, 277, 319. SIR-97 program for solution of crystal structures from diffraction data: A. Altomare, M. C. Burla, M. Camalli, G. L. Cascarano, C. Giacovazzo, A. Guagliardi, A. G. G. Moliterni, G. Polidori, R. Spagna, *J. Appl. Cryst.* **1999**, 32, 115-119.
- [S2] a) I. Horman, B. Dreux, *Helv. Chim. Acta* **1984**, 67, 754; b) C.-J. Wallentin, T. Wixe, O. F. Wendt, K.-E. Bergquist, K. Wärnmark, *Chem. Eur. J.* **2010**, 16, 3994.
- [S3] Gaussian 09, Revision A.02, M. J. Frisch, G. W. Trucks, H. B. Schlegel, G. E. Scuseria, M. A. Robb, J. R. Cheeseman, G. Scalmani, V. Barone, B. Mennucci, G. A. Petersson, H. Nakatsuji, M. Caricato, X. Li, H. P. Hratchian, A. F. Izmaylov, J. Bloino, G. Zheng, J. L. Sonnenberg, M. Hada, M. Ehara, K. Toyota, R. Fukuda, J. Hasegawa, M. Ishida, T. Nakajima, Y. Honda, O. Kitao, H. Nakai, T. Vreven, J. A. Montgomery, Jr., J. E. Peralta, F. Ogliaro, M. Bearpark, J. J. Heyd, E. Brothers, K. N. Kudin, V. N. Staroverov, R. Kobayashi, J. Normand, K. Raghavachari, A. Rendell, J. C. Burant, S. S. Iyengar, J. Tomasi, M. Cossi, N. Rega, J. M. Millam, M. Klene, J. E. Knox, J. B. Cross, V. Bakken, C. Adamo, J. Jaramillo, R. Gomperts, R. E. Stratmann, O. Yazyev, A. J. Austin, R. Cammi, C. Pomelli, J. W. Ochterski, R. L. Martin, K. Morokuma, V. G. Zakrzewski, G. A. Voth, P. Salvador, J. J. Dannenberg, S. Dapprich, A. D. Daniels, O. Farkas, J. B. Foresman, J. V. Ortiz, J. Cioslowski, and D. J. Fox, Gaussian, Inc.: Wallingford, CT, 2009.
- [S4] a) A. D. Becke, *J. Chem. Phys.* **1993**, 98, 1372; b) C. Lee, W. Yang, R. G. Parr, *Phys. Rev. B* **1998**, 37, 785.
- [S5] D. Shimizu, J. Oh, K. Furukawa, D. Kim, A. Osuka, *Angew. Chemie Int. Ed.* **2015**, 54, 6613.
- [S6] P. Kim, S. Ham, J. Oh, H. Uoyama, H. Watanabe, K. Tagawa, H. Uno, D. Kim, *Phys. Chem. Chem. Phys.* **2013**, 15, 10612.
